# Supplementary material for: Control of Slc7a5 sensitivity by the voltage-sensing domain of Kv1 channels
Source: eLife. 2020 Nov 9;9:e54916. doi: 10.7554/eLife.54916 (PMC7690953; doi:10.7554/eLife.54916)
Supplement: Figure 1—source data 1. [file elife-54916-fig1-data1.xlsx]

## Sheet: Sheet1
	Kv1.1		2017_04_11_0175_leak150.abf				2017_04_11_0179.abf				2017_04_11_0185_leak100.abf				2017_04_11_0192_leak140.abf				2017_04_11_0198_leak200.abf				2017_04_14_0129_leak250.abf				2017_04_14_0135.abf				2017_04_14_0147_leak500.abf				2017_04_14_0153_leak80.abf				2017_04_14_0161_leak380.abf				2017_04_20_0269_leak60.abf				2017_04_20_0275_leak40.abf
		Voltage (mV)	Tail Current Magnitude (pA)	Normalized Tail Current		Voltage (mV)	Tail Current Magnitude (pA)	Normalized Tail Current		Voltage (mV)	Tail Current Magnitude (pA)	Normalized Tail Current		Voltage (mV)	Tail Current Magnitude (pA)	Normalized Tail Current		Voltage (mV)	Tail Current Magnitude (pA)	Normalized Tail Current		Voltage (mV)	Tail Current Magnitude (pA)	Normalized Tail Current		Voltage (mV)	Tail Current Magnitude (pA)	Normalized Tail Current		Voltage (mV)	Tail Current Magnitude (pA)	Normalized Tail Current		Voltage (mV)	Tail Current Magnitude (pA)	Normalized Tail Current		Voltage (mV)	Tail Current Magnitude (pA)	Normalized Tail Current		Voltage (mV)	Tail Current Magnitude (pA)	Normalized Tail Current		Voltage (mV)	Tail Current Magnitude (pA)	Normalized Tail Current
		-120	18.5791	0		-120	17.0898	0.011885		-120	23.8965	0		-120	41.2207	0.019949		-120	55.1172	0.018433		-120	312.427	0.060484		-120	34.1797	0.005479		-120	102.393	0.040334		-120	28.6621	0.001596		-120	98.9051	0.008824		-120	43.0316	0.002854		-120	31.7383	0.008821
		-110	26.5137	0.002795		-110	18.9209	0.014431		-110	32.4414	0.001946		-110	29.624	0.007722		-110	58.1689	0.022273		-110	297.778	0.046659		-110	47.6074	0.025571		-110	78.5889	0.021151		-110	27.4414	0.000532		-110	88.5291	0.001681		-110	41.8109	0.002283		-110	34.79	0.012831
		-100	27.124	0.00301		-100	8.54492	0		-100	36.1035	0.00278		-100	29.0137	0.007079		-100	49.624	0.011521		-100	280.688	0.03053		-100	30.5176	0		-100	88.9648	0.029513		-100	26.8311	0		-100	89.7498	0.002521		-100	45.473	0.003995		-100	30.5176	0.007217
		-90	21.0205	0.00086		-90	12.207	0.005093		-90	27.5586	0.000834		-90	27.793	0.005792		-90	56.3379	0.019969		-90	289.233	0.038594		-90	36.0107	0.008219		-90	65.1611	0.01033		-90	40.8691	0.012234		-90	88.5291	0.001681		-90	36.9281	0		-90	25.0244	0
		-80	19.1895	0.000215		-80	10.9863	0.003396		-80	28.7793	0.001112		-80	31.4551	0.009653		-80	53.8965	0.016897		-80	248.34	0		-80	40.2832	0.014612		-80	52.3438	0		-80	33.5449	0.005851		-80	86.0877	0		-80	57.0697	0.009418		-80	28.0762	0.00401
		-70	34.4482	0.00559		-70	12.8174	0.005942		-70	45.8691	0.005005		-70	23.5205	0.001287		-70	40.4688	0		-70	265.43	0.016129		-70	53.1006	0.03379		-70	63.9404	0.009346		-70	29.2725	0.002128		-70	90.9706	0.003361		-70	68.056	0.014555		-70	31.1279	0.008019
		-60	66.1865	0.016771		-60	10.9863	0.003396		-60	54.4141	0.006951		-60	22.2998	0		-60	56.3379	0.019969		-60	291.675	0.040899		-60	61.0352	0.045662		-60	79.1992	0.021643		-60	51.2451	0.021277		-60	94.6327	0.005882		-60	90.639	0.025114		-60	44.5557	0.025662
		-50	286.523	0.094388		-50	42.1143	0.046689		-50	323.579	0.068261		-50	84.5557	0.065637		-50	144.228	0.130568		-50	355.151	0.100806		-50	101.318	0.105936		-50	104.224	0.04181		-50	125.098	0.085638		-50	147.733	0.042437		-50	205.385	0.078767		-50	92.1631	0.088212
		-40	979.883	0.338637		-40	242.92	0.325976		-40	1348.97	0.301821		-40	340.903	0.335907		-40	358.462	0.400154		-40	565.723	0.299539		-40	260.62	0.344292		-40	342.871	0.234137		-40	412.573	0.33617		-40	485.868	0.27521		-40	751.65	0.33419		-40	269.165	0.32077
		-30	1782.49	0.621372		-30	504.761	0.690153		-30	2672.82	0.603364		-30	696.128	0.710425		-30	622.744	0.732719		-30	934.985	0.648041		-30	518.799	0.730594		-30	874.487	0.662568		-30	875.83	0.739894		-30	1130.4	0.718908		-30	1578.68	0.72089		-30	514.526	0.643144
		-20	2314.72	0.808858		-20	665.894	0.914261		-20	3592.62	0.812874		-20	861.533	0.884813		-20	730.166	0.867896		-20	1148	0.849078		-20	631.104	0.89863		-20	1150.98	0.885391		-20	1054.66	0.895745		-20	1439.24	0.931513		-20	2002.87	0.919235		-20	655.518	0.828388
		-10	2755.4	0.964094		-10	727.539	1		-10	4115.08	0.931878		-10	934.165	0.96139		-10	807.681	0.965438		-10	1217.58	0.914747		-10	690.308	0.987215		-10	1240.09	0.957206		-10	1110.82	0.944681		-10	1522.86	0.989076		-10	2104.8	0.966895		-10	723.877	0.918204
		0	2845.12	0.9957		0	716.553	0.98472		0	4342.74	0.983734		0	961.02	0.989704		0	808.901	0.966974		0	1269.46	0.96371		0	697.021	0.99726		0	1283.42	0.99213		0	1144.99	0.974468		0	1514.31	0.983193		0	2164.61	0.994863		0	753.174	0.956696
		10	2857.32	1		10	715.942	0.983871		10	4414.15	1		10	929.893	0.956885		10	815.615	0.975422		10	1283.5	0.976959		10	676.88	0.967123		10	1293.19	1		10	1134.62	0.965426		10	1523.47	0.989496		10	2175.6	1		10	771.484	0.980754
		20	2840.84	0.994195		20	717.163	0.985569		20	4386.69	0.993744		20	965.903	0.994852		20	832.705	0.996928		20	1273.12	0.967166		20	695.19	0.994521		20	1284.64	0.993114		20	1174.29	1		20	1538.72	1		20	2147.52	0.986872		20	786.133	1
		30	2808.5	0.982799		30	718.384	0.987267		30	4316.5	0.977756		30	970.786	1		30	835.146	1		30	1260.91	0.955645		30	692.139	0.989954		30	1256.57	0.970487		30	1156.59	0.984574		30	1510.04	0.980252		30	2168.89	0.996861		30	781.25	0.993585
		40	2752.95	0.963234		40	700.684	0.962649		40	4191.99	0.949395		40	939.048	0.966538		40	816.836	0.976959		40	1284.72	0.978111		40	698.852	1		40	1244.97	0.961141		40	1144.99	0.974468		40	1519.8	0.986975		40	2168.89	0.996861		40	767.822	0.975942
		50	2691.92	0.941733		50	712.28	0.978778		50	4080.29	0.923954		50	933.555	0.960746		50	800.356	0.956221		50	1297.53	0.990207		50	686.035	0.980822		50	1238.26	0.95573		50	1149.27	0.978191		50	1503.93	0.97605		50	2133.49	0.980308		50	767.212	0.97514
		60	2629.66	0.919802		60	690.308	0.948217		60	3960.05	0.896566		60	934.775	0.962033		60	819.277	0.980031		60	1307.91	1		60	685.425	0.979909		60	1237.04	0.954747		60	1137.67	0.968085		60	1492.95	0.968487		60	2107.24	0.968037		60	757.446	0.96231
		70	2561.3	0.895721		70	688.477	0.945671		70	3832.49	0.86751		70	904.258	0.929858		70	805.85	0.963134		70	1260.91	0.955645		70	670.776	0.957991		70	1218.73	0.93999		70	1135.23	0.965957		70	1480.74	0.960084		70	2088.32	0.959189
						80	684.814	0.940577		80	3687.84	0.834561		80	904.868	0.930502		80	783.877	0.935484		80	1252.98	0.948157		80	676.88	0.967123		80	1205.3	0.929169		80	1121.19	0.953723		80	1499.05	0.972689		80	2065.13	0.948345
						90	685.425	0.941426		90	3562.72	0.806061		90	874.351	0.898327		90	782.046	0.93318		90	1252.37	0.947581		90	657.959	0.938813		90	1221.17	0.941958		90	1109.6	0.943617		90	1470.97	0.953361		90	2068.79	0.950057
						100	667.725	0.916808		100	3424.16	0.774503		100	865.806	0.889318		100	775.332	0.924731		100	1236.5	0.932604		100	686.035			100	1191.87	0.918347		100	1116.31	0.949468		100	1440.46	0.932353		100	2067.57	0.949486
						110	659.18	0.904924		110	3295.99	0.745308		110	846.885	0.869369		110	756.411	0.900922		110	1202.93	0.900922		110	664.062			110	1193.7			110	1088.84			110	1452.06			110	2028.51
						120	649.414	0.891341		120	3189.18	0.720979		120	850.547	0.87323		120	746.645	0.888633		120	1191.33	0.889977			633.545				1166.23				1068.09				1434.35				2030.34
			z->	3.15084			z->	4.24866			z->	3.24903			z->	3.98592			z->	3.43506			z->	3.2274			z->	3.83462			z->	4.38047			z->	4.01779			z->	4.85414			z->	4.13028			z->	3.16017
			V1/2->	-33.715			V1/2->	-35.0406			V1/2->	-32.7573			V1/2->	-35.3118			V1/2->	-36.7333			V1/2->	-33.8364			V1/2->	-36.0498			V1/2->	-33.4032			V1/2->	-35.843			V1/2->	-34.8419			V1/2->	-35.6911			V1/2->	-33.7594
	Kv1.1+mCherry-Slc7a5		2017_04_11_0211_leak120.abf				2017_04_11_0217_leak80.abf				2017_04_11_0224_leak200.abf				2017_04_11_0231_leak200.abf				2017_04_20_0218_leak150.abf				2017_04_20_0225_leak140.abf				2017_04_20_0232_leak300.abf				2017_04_20_0240.abf				2017_04_20_0246_leak70.abf				2017_04_20_0253_leak460.abf				2017_04_20_0260_leak65.abf
		Voltage (mV)	Tail Current Magnitude (pA)	Normalized Tail Current		Voltage (mV)	Tail Current Magnitude (pA)	Normalized Tail Current		Voltage (mV)	Tail Current Magnitude (pA)	Normalized Tail Current		Voltage (mV)	Tail Current Magnitude (pA)	Normalized Tail Current		Voltage (mV)	Tail Current Magnitude (pA)	Normalized Tail Current		Voltage (mV)	Tail Current Magnitude (pA)	Normalized Tail Current		Voltage (mV)	Tail Current Magnitude (pA)	Normalized Tail Current		Voltage (mV)	Tail Current Magnitude (pA)	Normalized Tail Current		Voltage (mV)	Tail Current Magnitude (pA)	Normalized Tail Current		Voltage (mV)	Tail Current Magnitude (pA)	Normalized Tail Current		Voltage (mV)	Tail Current Magnitude (pA)	Normalized Tail Current			Voltage (mV)	AVERAGE
		-120	97.9248	0.01952		-120	45.8691	0.012804		-120	25.21	0.003157		-120	60	0.005382		-120	48.0968	0.032374		-120	62.4582	0		-120	27.832	0.006645		-120	17.0898	0.015873		-120	85.918	0.043253		-120	40.5926	0.016544		-120	65.1312	0			-120	0.014141
		-110	89.9902	0.00976		-110	42.8174	0.006402		-110	22.1582	0		-110	58.1689	0.004613		-110	45.6554	0.017986		-110	64.2892	0.002114		-110	21.7285	0		-110	14.6484	0.007937		-110	90.8008	0.057093		-110	35.0994	0		-110	68.7933	0.006166			-110	0.010188
		-100	92.4316	0.012763		-100	47.0898	0.015365		-100	25.8203	0.003788		-100	49.624	0.001025		-100	45.6554	0.017986		-100	96.6379	0.039464		-100	31.4941	0.010631		-100	12.207	0		-100	77.9834	0.020761		-100	39.9822	0.014706		-100	68.183	0.005139			-100	0.012875
		-90	82.0557	0		-90	39.7656	0		-90	36.8066	0.015152		-90	47.1826	0		-90	42.6036	0		-90	99.0793	0.042283		-90	50.415	0.031229		-90	17.0898	0.015873		-90	85.3076	0.041522		-90	39.9822	0.014706		-90	79.7796	0.024666			-90	0.016857
		-80	94.8731	0.015766		-80	43.4277	0.007682		-80	37.417	0.015783		-80	69.7656	0.009482		-80	44.4347	0.010791		-80	95.4172	0.038055		-80	51.6357	0.032558		-80	12.207	0		-80	82.2559	0.032872		-80	49.7479	0.044118		-80	83.4417	0.030832			-80	0.021631
		-70	86.3281	0.005255		-70	59.2969	0.040973		-70	42.2998	0.020833		-70	75.2588	0.011789		-70	54.8107	0.071942		-70	120.442	0.066949		-70	39.4287	0.019269		-70	16.4795	0.013889		-70	70.6592	0		-70	48.5271	0.040441		-70	99.3109	0.057554			-70	0.031718
		-60	103.418	0.026276		-60	70.2832	0.06402		-60	50.8447	0.029672		-60	108.828	0.025884		-60	54.2003	0.068345		-60	171.711	0.126145		-60	55.2978	0.036545		-60	28.6865	0.053571		-60	91.4111	0.058824		-60	88.8104	0.161765		-60	109.076	0.073998			-60	0.065913
		-50	143.091	0.075075		-50	106.294	0.139565		-50	95.4004	0.075758		-50	244.936	0.083034		-50	67.6281	0.147482		-50	295.002	0.268499		-50	120.606	0.107641		-50	40.8935	0.093254		-50	131.694	0.17301		-50	118.718	0.251838		-50	163.398	0.165468			-50	0.143693
		-40	340.845	0.318318		-40	265.596	0.473752		-40	249.819	0.23548		-40	768.618	0.302922		-40	125.001	0.485612		-40	525.715	0.534884		-40	381.226	0.391362		-40	108.643	0.313492		-40	230.571	0.453287		-40	236.515	0.606618		-40	359.931	0.496403			-40	0.419284
		-30	660.059	0.710961		-30	399.873	0.755442		-30	538.516	0.534091		-30	1481.51	0.602255		-30	176.881	0.791367		-30	784.504	0.833686		-30	702.27	0.740864		-30	236.206	0.728175		-30	367.9	0.842561		-30	334.172	0.900735		-30	551.581	0.819116			-30	0.750841
		-20	813.257	0.899399		-20	462.129	0.886044		-20	746.645	0.749369		-20	1967.96	0.806509		-20	209.84	0.985612		-20	886.433	0.951374		-20	853.027	0.904983		-20	280.151	0.871032		-20	403.911	0.944637		-20	356.755	0.96875		-20	644.965	0.976362			-20	0.904006
		-10	861.475	0.958709		-10	496.919	0.959027		-10	872.378	0.879419		-10	2253.6	0.926448		-10	212.281	1		-10	899.861	0.966878		-10	907.959	0.964784		-10	280.762	0.873016		-10	411.846	0.967128		-10	361.637	0.983456		-10	654.731	0.992806			-10	0.95197
		0	882.227	0.984234		0	508.516	0.983355		0	898.013	0.905934		0	2370.79	0.975654		0	207.399	0.971223		0	913.288	0.982382		0	930.542	0.989369		0	307.617	0.960317		0	423.442	1		0	351.262	0.952206		0	659.003	1			0	0.973152
		10	890.161	0.993994		10	502.412	0.970551		10	952.944	0.962753		10	2385.44	0.981804		10	204.347	0.953237		10	915.73	0.985201		10	934.814	0.99402		10	314.331	0.982143		10	417.339	0.982699		10	367.131	1		10	641.303	0.970195			10	0.979691
		20	895.044	1		20	516.45	1		20	956.606	0.96654		20	2425.11	0.998462		20	195.802	0.902878		20	928.547	1		20	915.894	0.973422		20	319.824	1		20	412.456	0.968858		20	356.755	0.96875		20	645.576	0.97739			20	0.977845
		30	887.109	0.99024		30	506.074	0.978233		30	976.748	0.987374		30	2398.26	0.987186		30	209.84	0.985612		30	900.471	0.967583		30	926.269	0.984718		30	299.683	0.934524		30	408.184	0.956747		30	336.613	0.908088		30	637.031	0.963001			30	0.967573
		40	869.409	0.968468		40	504.243	0.974392		40	971.255	0.981692		40	2423.89	0.99795		40	211.671	0.996403		40	900.471	0.967583		40	926.88	0.985382		40	305.176	0.952381		40	402.69	0.941176		40	331.73	0.893382		40	624.213	0.941418			40	0.963657
		50	872.461	0.972222		50	499.971	0.965429		50	988.955	1		50	2428.77	1		50	194.581	0.895683		50	907.185	0.975335		50	940.308	1		50	301.514	0.940476		50	409.404	0.960208		50	343.937	0.930147		50	621.772	0.937307			50	0.961528
		60	857.202	0.953453		60	509.126	0.984635		60	974.307	0.984848		60	2409.85	0.992055		60	198.243	0.917266		60	882.771	0.947146		60	924.438	0.982724		60	310.059	0.968254		60	399.028	0.930796		60	339.665	0.917279		60	612.617	0.921891			60	0.954577
		70	830.347	0.92042		70	495.698	0.956466		70	977.358	0.988005		70	2377.51	0.978473		70	189.088	0.863309		70	873.615	0.936575		70	896.362	0.952159		70	300.903	0.938492		70	373.394	0.858131		70	351.262	0.952206		70	630.317	0.951696			70	0.935994
		80	832.178	0.922673		80	487.764	0.939821		80	976.748	0.987374		80	2346.99	0.965659		80	192.75	0.884892		80	860.798	0.921776		80	938.477	0.998007		80	291.138	0.906746		80	389.873	0.904844		80	354.924	0.963235		80	619.33	0.933196			80	0.938929
		90	831.567	0.921922		90	485.322	0.934699		90	968.813	0.979167		90	2317.08	0.953101		90	198.854	0.920863		90	861.408	0.922481		90	909.79	0.966777		90	303.345	0.946429		90	401.47	0.937716		90	354.924	0.963235		90	624.213	0.941418			90	0.944346
		100	823.023	0.911411		100	490.815	0.946223		100	987.124	0.998106		100	2333.56	0.960021		100	183.595	0.830935		100	840.046	0.897815		100	929.932	0.988704		100	319.214	0.998016		100	388.652	0.901384		100	354.313	0.961397		100	621.772	0.937307			100	0.939211
		110	815.088	0.901652		110	491.426	0.947503		110	978.579	0.989268		110	2295.72	0.944131		110	182.374	0.823741		110	843.708	0.902044		110	913.452	0.970764		110	300.903	0.938492		110	378.276	0.871972		110	355.534	0.965074		110	622.382	0.938335			110	0.926634
		120	809.595	0.894895		120	479.219	0.921895		120	978.579	0.989268		120	2318.91	0.95387		120	188.478	0.859712		120	846.15	0.904863		120	912.842	0.9701		120	306.397	0.956349		120	381.938	0.882353		120	358.586	0.974265		120	615.668	0.92703
																																																AVG	SD
			z->	4.03118			z->	3.29965			z->	2.72355			z->	3.08996			z->	3.8661			z->	3.00632			z->	3.73901			z->	3.51331			z->	3.97692			z->	3.44951			z->	3.86855			z	3.50582	0.43518
			V1/2->	-35.2375			V1/2->	-38.3576			V1/2->	-29.918			V1/2->	-32.7652			V1/2->	-39.4281			V1/2->	-42.0466			V1/2->	-36.8175			V1/2->	-35.1893			V1/2->	-39.4336			V1/2->	-43.521			V1/2->	-39.9786			V1/2	-37.5175	4.02597
[truncated: 11 more columns]
