# Supplementary material for: Control of Slc7a5 sensitivity by the voltage-sensing domain of Kv1 channels
Source: eLife. 2020 Nov 9;9:e54916. doi: 10.7554/eLife.54916 (PMC7690953; doi:10.7554/eLife.54916)
Supplement: Figure 2—source data 1. [file elife-54916-fig2-data1.xlsx]

## Sheet: Sheet1
Kv1.1					Kv1.1 + GFP-Slc7a5					Kv1.2					Kv1.2 + Slc7a5
	initial	post -120mV	Fold change			initial	post -120mV	Fold change			initial	post -120mV	Fold change			initial	post -120mV	Fold change
2017_04_11_0188_leak180.abf	24.5742	129.049	5.25141		2017_04_11_0200_leak120.abf	1.90052	13.2414	6.96724		2018_09_09_0016Leak.abf	271.559	261.836	0.964195		2019_02_15_0001.abf	1.81996	7.05789	3.87806
2017_04_11_0194_leak160.abf	13.4491	68.775	5.11372		2017_04_11_0207_leak80.abf	26.8321	102.28	3.81184		2018_09_20_0057Leak.abf	222.516	279.021	1.25394		2019_02_15_0020.abf	4.42504	24.2615	5.48276
2017_04_14_0125_leak180.abf	80.4087	173.359	2.15598		2017_04_11_0213_leak80.abf	4.06629	51.5026	12.6657		2018_09_20_0061Leak.abf	26.3917	36.7677	1.39315		2019_02_15_0027Leak.abf	7.59802	27.5134	3.62113
2017_04_14_0131.abf	26.9209	105.939	3.93521		2017_04_11_0220_leak190.abf	35.1137	241.913	6.88943		2018_09_22_0007Leak.abf	158.567	177.963	1.12232		2019_02_15_0053Leak.abf	5.56128	30.7587	5.53086
2017_04_14_0142_leak420.abf	91.5629	173.327	1.89298		2017_04_11_0227_leak150.abf	158.897	590.923	3.7189		2019_03_03_0021.abf	124.007	120.69	0.973252		2019_02_19_0105.abf	120.724	275.427	2.28145
2017_04_14_0155_leak220.abf	79.2782	229.273	2.89201		2017_04_14_0164_leak360.abf	3.1005	17.092	5.51265		2019_03_03_0009.abf	70.3938	73.1795	1.03957		2019_02_24_0000Leak.abf	3.12083	19.7052	6.31407
2017_04_20_0264.abf	97.7593	291.314	2.97991		2017_04_20_0214_leak110.abf	8.50703	29.0739	3.41763		2019_03_03_0003.abf	138.236	122.813	0.888424		2019_02_24_0004Leak.abf	72.2123	229.407	3.17684
2017_04_20_0271.abf	34.4188	68.1768	1.9808		2017_04_20_0220_leak100.abf	17.1521	139.861	8.15413		2019_06_03_0056.abf	314.965	275.855	0.875829		2019_02_24_0008Leak.abf	8.09638	56.2908	6.95258
2017_04_20_0279.abf	29.639	95.8992	3.23557		2017_04_20_0236.abf	12.1448	58.7308	4.83588		2019_06_03_0064.abf	69.494	62.2957	0.896417		2019_02_24_0015.abf	67.7221	381.649	5.63552
2017_04_20_0285.abf	73.4374	158.301	2.15559		2017_04_20_0242_leak50.abf	7.33623	54.3518	7.40868		2019_06_03_0070.abf	99.9783	119.483	1.19509		2019_02_24_0021.abf	49.457	160.344	3.2421
2017_04_20_0291.abf	117.961	410.531	3.48022		2017_04_20_0248.abf	6.89617	34.3933	4.98731		2019_06_03_0083.abf	134.686	117.711	0.873963		2019_02_24_0023Leak.abf	18.3183	172.008	9.38992
					2017_04_20_0256_leak90.abf	17.9281	89.077	4.96857							2019_04_24_0092.abf	2.62971	19.6416	7.46914
															2019_04_24_0099.abf	8.76223	39.6958	4.53033
										Fold change data for Kv1.2+/- Slc7a5					2019_04_24_0087.abf	7.09712	49.0553	6.91201
															2019_04_24_0078.abf	27.2535	89.1909	3.27264
															2019_03_02_0103.abf	13.2459	106.773	8.06081
															average	26.1278	105.549	5.35939
