# Supplementary material for: Control of Slc7a5 sensitivity by the voltage-sensing domain of Kv1 channels
Source: eLife. 2020 Nov 9;9:e54916. doi: 10.7554/eLife.54916 (PMC7690953; doi:10.7554/eLife.54916)
Supplement: Figure 3—source data 1. [file elife-54916-fig3-data1.xlsx]

## Sheet: Main Figure
Figure 3A (PCR)	Relative mRNA (Slc7a5/GAPDH)				Figure 3C (WB densitometry)
Parental LM	ShR4-1				Parental LM	ShR4-1
1	0.07				1	0.1323
1.2303	0.2435				1	0
0.4689	0.3266				1	0.112
1.7334	0.4478				1	0
					1	0
t-test	P = 0.022				t-test	P = 0.008
Figure 3F and G
Parental LM					ShR4-1 Ctrl					ShR4-1 + Slc7a5
	initial	post -120mV	Fold change			initial	post -120mV	Fold change			initial	post -120mV	Fold change
2019_04_16_0082Leak.abf	11.242	33.224	2.95535		2019_06_10_0061.abf	70.1082	108.109	1.54203		2019_06_10_0028.abf	7.11905	103.544	14.5447
2019_04_16_0097.abf	226.024	281.205	1.24414		2019_06_10_0066.abf	110.423	149.689	1.3556		2019_06_10_0034leak.abf	16.5506	54.4577	3.29038
2019_04_16_0103.abf	31.3199	62.5826	1.99817		2019_06_10_0071leak.abf	161.399	218.695	1.355		2019_06_10_0036leak.abf	2.26495	11.9464	5.27446
2019_04_17_0004.abf	62.2796	145.766	2.34051		2019_06_10_0076leak.abf	45.2518	73.2074	1.61778		2019_06_10_0045leak.abf	7.69774	29.1807	3.79082
2019_04_17_0009.abf	12.0375	30.2754	2.51509		2019_06_10_0078leak.abf	382.228	452.885	1.18486		2019_06_10_0046.abf	1.3224	15.5713	11.775
2019_04_17_0015.abf	31.9059	50.5833	1.58539		2019_06_10_0083.abf	67.936	94.1096	1.38527		2019_06_26_0003leak.abf	16.5557	72.6032	4.38538
2019_05_01_0001.abf	6.20561	33.1045	5.33461		2019_06_10_0088.abf	306.098	336.44	1.09912		2019_06_26_0015leak.abf	6.86599	75.6392	11.0165
2019_05_01_0006.abf	4.563	23.3694	5.12151		2019_06_10_0093leak.abf	230.712	229.163	0.993286		2019_06_26_0024leak.abf	11.3219	67.7109	5.98055
2019_05_01_0011.abf	12.4776	46.4664	3.72398		2019_06_26_0029.abf	41.6291	66.732	1.60301		2019_06_26_0025leak.abf	6.23767	65.0219	10.4241
2019_05_01_0023.abf	15.5907	33.6657	2.15934		2019_06_26_0034.abf	140.855	158.343	1.12416
2019_05_01_0030.abf	7.00633	25.609	3.65513		2019_06_26_0041leak.abf	45.223	67.6674	1.49631
2019_02_26_0030.abf	10.9656	26.5865	2.42453		2019_06_26_0045.abf	117.304	174.177	1.48484
2019_02_26_0035.abf	11.515	31.9129	2.77143		2019_06_26_0049.abf	78.3838	122.465	1.56237
2019_02_26_0040.abf	18.5231	41.5707	2.24426
2019_02_26_0059.abf	20.2165	87.4796	4.32713
average	32.1248	63.5601	2.96004			138.273	173.206	1.36951			8.43733	55.0751	7.83132

## Sheet: Supplement 1
Fig. 3 Supp. 1 (A and B)
Kv1.1
Parental LM	current density at 10 mV	fold change		ShR1	current density at 10 mV	fold change		ShR2	current density at 10 mV	fold change		ShR3	current density at 10 mV	fold change		ShR4	current density at 10 mV	fold change
2019_02_26_0030.abf	10.9656	2.42453		2019_02_20_0052.abf	14.8866	2.69001		2019_02_26_0000.abf	3.079	6.19469		2019_02_18_0045.abf	186.68	1.53078		2019_03_04_0000.abf	94.8046	1.46135
2019_02_26_0035.abf	11.515	2.77143		2019_02_20_0056.abf	9.74974	1.45529		2019_02_26_0006.abf	15.3422	2.78261		2019_02_18_0047.abf	10.0579	2.06553		2019_03_04_0005.abf	142.415	1.14913
2019_02_26_0040.abf	18.5231	2.24426		2019_02_20_0058.abf	14.3707	1.93933		2019_02_26_0012.abf	29.0605	1.68213		2019_02_18_0049.abf	359.824	1.0756		2019_03_04_0011.abf	317.978	1.39107
2019_02_26_0059.abf	20.2165	4.32713		2019_02_26_0064.abf	23.4324	3.14391		2019_02_26_0016.abf	24.8413	1.67322		2019_02_18_0053.abf	41.3492	4.54817		2019_03_04_0018.abf	35.7583	3.66979
2018_09_11_0002.abf	60.1608	1.97057		2019_02_26_0070.abf	168.746	1.17709		2019_02_26_0024.abf	13.1765	1.8679						2019_03_04_0022.abf	50.604	0.984746
2018_09_11_0010.abf	13.4346	2.34078		2019_02_26_0078Leak.abf	172.615	1.38915										2019_03_04_0024Leak.abf	68.9268	3.64974
2018_09_24_0017.abf	208.457	2.00331		2019_02_26_0081.abf	85.7951	1.2909										2019_03_04_0031.abf	333.112	1.24512
2018_09_24_0004.abf	17.2439	3.9244		2019_02_26_0087.abf	247.043	2.32326										2019_03_04_0035.abf	85.6227	2.14378
				2019_02_26_0088.abf	277.511	1.30624										2019_03_04_0037.abf	121.164	1.80913
																2019_03_04_0041.abf	29.7961	3.17146
		2.7508				1.85724				2.84011				2.30502				2.06753
		0.891327				0.710682				1.9303				1.54919				1.04771
Fig. 3 Supp. 1 (C)
Parental LM	fold change		ShR1-3	fold change		ShR1-4	fold change		ShR1-5	fold change		ShR1-6	fold change			ShR4-1	fold change	ShR4-2	fold change		ShR4-3	fold change		ShR4-4	fold change		ShR-4-5	fold change
2019_04_16_0073.abf	1.68162		2019_04_30_0001.abf	1.00985		2019_04_16_0008.abf	1.43772		2019_04_16_0029.abf	1.58984		2019_04_16_0050.abf	1.38461		2019_04_30_0024.abf	1.17963		2019_04_16_0109.abf	1.12393		2019_04_16_0130.abf	1.48995		2019_04_16_0151.abf	1.41907		2019_04_17_0039.abf	1.65607
2019_04_16_0087.abf	1.78397		2019_04_30_0006.abf	1.7905		2019_04_16_0018.abf	1.37615		2019_04_16_0035.abf	1.46198		2019_04_16_0058.abf	1.41539		2019_04_30_0031.abf	1.28265		2019_04_16_0115.abf	1.63758		2019_04_16_0134.abf	1.60713		2019_04_16_0155.abf	2.03685		2019_04_17_0045.abf	1.34891
2019_04_16_0082Leak.abf	2.95535		2019_04_30_0010.abf	1.22655		2019_04_16_0024.abf	1.54508		2019_04_16_0040.abf	1.48688		2019_04_16_0064.abf	1.54652		2019_04_30_0036.abf	0.962056		2019_04_16_0121.abf	1.76627		2019_04_16_0139.abf	1.39571		2019_04_16_0162.abf	1.83429
2019_04_16_0078.abf	2.09136		2019_04_30_0014.abf	1.30085		2019_04_17_0020.abf	1.32735		2019_04_16_0044.abf	1.41596		2019_04_16_0068.abf	1.65225					2019_04_16_0125.abf	1.47416		2019_04_16_0144.abf	1.47431
2019_04_16_0097.abf	1.24414		2019_04_30_0020.abf	1.28355		2019_04_17_0024.abf	1.58258
2019_04_16_0103.abf	1.99817					2019_04_17_0029.abf	1.50776
2019_04_17_0004.abf	2.34051					2019_04_17_0034.abf	1.24587
2019_04_17_0009.abf	2.51509					2019_05_01_0035.abf	1.55559
2019_04_17_0015.abf	1.58539					2019_05_01_0040.abf	0.985618
2019_05_01_0001.abf	5.33461					2019_05_01_0045.abf	1.51215
2019_05_01_0006.abf	5.12151					2019_05_01_0049.abf	1.49428
2019_05_01_0011.abf	3.72398					2019_05_01_0054.abf	1.39544
2019_05_01_0018.abf	1.37758
2019_05_01_0023.abf	2.15934
2019_05_01_0030.abf	3.65513
	2.63785			1.32226			1.4138			1.48866			1.49969			1.14145			1.50049			1.49178			1.7634			1.50249
	1.28393			0.286341			0.168455			0.0735701			0.123581			0.163673			0.278043			0.0872613			0.314932			0.217194

## Sheet: Supplement 2
Kv1.1 Parental LM cells		2019_05_01_0026.abf					2019_05_01_0021.abf					2019_05_01_0014.abf				2019_05_01_0009.abf					2019_05_01_0004.abf					2019_04_17_0018.abf					2019_04_17_0013.abf					2019_04_16_0106.abf					2019_04_16_0101.abf					2019_04_16_0076.abf
	Voltage (mV)	Tail Current Magnitude (pA)	Normalized Tail Current			Voltage (mV)	Tail Current Magnitude (pA)	Normalized Tail Current			Voltage (mV)	Tail Current Magnitude (pA)	Normalized Tail Current			Voltage (mV)	Tail Current Magnitude (pA)	Normalized Tail Current			Voltage (mV)	Tail Current Magnitude (pA)	Normalized Tail Current			Voltage (mV)	Tail Current Magnitude (pA)	Normalized Tail Current			Voltage (mV)	Tail Current Magnitude (pA)	Normalized Tail Current			Voltage (mV)	Tail Current Magnitude (pA)	Normalized Tail Current			Voltage (mV)	Tail Current Magnitude (pA)	Normalized Tail Current			Voltage (mV)	Tail Current Magnitude (pA)	Normalized Tail Current
	-130	61.6455	0.0457516			-130	40.8936	0.0205864			-130	37.2314	0.0316594			-130	28.6865	0.010582			-130	56.1523	0			-130	62.2559	0.0156863			-130	54.9316	0.0359281			-130	67.1387	0.0326209			-130	64.0869	0.0036142			-130	37.8418	0
	-120	51.2695	0.0179739			-120	36.0107	0.0155958			-120	32.959	0.0240175			-120	29.2969	0.0123457			-120	67.749	0.0289634			-120	66.5283	0.0248366			-120	64.6973	0.0678643			-120	58.5938	0.0168729			-120	63.4766	0.0033883			-120	53.1006	0.0603865
	-110	56.1523	0.0310458			-110	34.79	0.0143481			-110	19.5312	0			-110	33.5693	0.0246914			-110	61.6455	0.0137195			-110	69.5801	0.0313725			-110	60.4248	0.0538922			-110	58.5938	0.0168729			-110	54.3213	0			-110	48.2178	0.0410628
	-100	58.5938	0.0375817			-100	20.752	0			-100	32.3486	0.0229258			-100	29.9072	0.0141093			-100	75.0732	0.0472561			-100	62.2559	0.0156863			-100	45.7764	0.005988			-100	62.2559	0.023622			-100	57.9834	0.0013553			-100	40.8936	0.0120773
	-90	53.7109	0.0245098			-90	28.0762	0.007486			-90	33.5693	0.0251092			-90	37.8418	0.037037			-90	88.501	0.0807927			-90	54.9316	0			-90	43.9453	0			-90	49.4385	0			-90	62.2559	0.0029365			-90	47.6074	0.0386473
	-80	44.5557	0			-80	37.8418	0.0174672			-80	35.4004	0.0283843			-80	31.7383	0.0194004			-80	77.5146	0.0533537			-80	75.0732	0.0431373			-80	44.5557	0.001996			-80	70.1904	0.0382452			-80	67.1387	0.0047436			-80	45.7764	0.031401
	-70	61.0352	0.0441176			-70	54.9316	0.0349345			-70	46.3867	0.0480349			-70	25.0244	0			-70	86.6699	0.0762195			-70	82.3975	0.0588235			-70	61.0352	0.0558882			-70	70.8008	0.0393701			-70	104.98	0.0187486			-70	46.9971	0.0362319
	-60	75.0732	0.0816993			-60	85.4492	0.066126			-60	75.6836	0.100437			-60	54.9316	0.0864198			-60	100.708	0.111281			-60	108.643	0.115033			-60	62.8662	0.0618762			-60	92.7734	0.079865			-60	150.757	0.0356901			-60	44.5557	0.02657
	-50	98.2666	0.143791			-50	201.416	0.184654			-50	167.847	0.265284			-50	95.8252	0.204586			-50	170.898	0.286585			-50	170.288	0.247059			-50	108.643	0.211577			-50	133.057	0.154106			-50	340.576	0.105941			-50	61.0352	0.0917874
	-40	230.103	0.496732			-40	487.061	0.476606			-40	340.576	0.574236			-40	195.923	0.493827			-40	248.413	0.480183			-40	289.307	0.501961			-40	192.261	0.48503			-40	275.879	0.417323			-40	913.696	0.318048			-40	106.201	0.270531
	-30	344.849	0.803922			-30	750.122	0.745477			-30	493.164	0.847162			-30	281.372	0.740741			-30	334.473	0.695122			-30	424.805	0.792157			-30	287.476	0.796407			-30	496.216	0.823397			-30	1605.22	0.573978			-30	194.702	0.620773
	-20	393.677	0.93464			-20	880.127	0.878353			-20	559.082	0.965066			-20	330.2	0.881834			-20	397.339	0.852134			-20	491.333	0.93464			-20	317.993	0.896208			-20	546.875	0.91676			-20	2139.28	0.771629			-20	245.972	0.823672
	-10	402.832	0.95915			-10	933.838	0.93325			-10	573.73	0.991266			-10	355.225	0.954145			-10	426.025	0.923781			-10	513.916	0.983007			-10	335.083	0.952096			-10	584.106	0.985377			-10	2430.42	0.879377			-10	282.593	0.968599
	0	414.429	0.990196			0	966.187	0.966313			0	567.017	0.979258			0	364.38	0.9806			0	438.843	0.955793			0	521.24	0.998693			0	337.524	0.96008			0	583.496	0.984252			0	2611.69	0.946465			0	280.151	0.958937
	10	411.987	0.98366			10	990.601	0.991266			10	572.51	0.989083			10	360.718	0.970018			10	436.401	0.949695			10	510.864	0.976471			10	348.511	0.996008			10	574.341	0.967379			10	2689.82	0.975378			10	289.307	0.995169
	20	418.091	1			20	999.146	1			20	576.172	0.995633			20	371.094	1			20	453.491	0.992378			20	518.188	0.992157			20	349.121	0.998004			20	592.041	1			20	2738.04	0.993223			20	290.527	1
	30	402.222	0.957516			30	948.486	0.948222			30	568.237	0.981441			30	344.849	0.924162			30	456.543	1			30	521.851	1			30	349.731	1			30	572.51	0.964005			30	2756.35	1			30	277.1	0.94686
	40	400.391	0.952614			40	981.445	0.981909			40	578.613	1			40	346.68	0.929453			40	432.129	0.939024			40	512.695	0.980392			40	336.914	0.958084			40	588.379	0.993251			40	2728.88	0.989835			40	258.179	0.871981
	50	404.053	0.962418			50	972.9	0.973175			50	559.692	0.966157			50	341.187	0.91358			50	441.284	0.96189			50	509.033	0.972549			50	326.538	0.924152			50	576.782	0.971878			50	2708.13	0.982155			50	260.62	0.881642
	60	389.404	0.923203			60	949.097	0.948846			60	543.213	0.936681			60	327.148	0.873016			60	441.284	0.96189			60	500.488	0.954248			60	334.473	0.9501			60	560.913	0.942632			60	2692.87	0.976508			60	281.982	0.966184
	70	384.521	0.910131			70	937.5	0.936993			70	542.603	0.935589			70	334.473	0.89418			70	444.336	0.969512			70	491.333	0.93464			70	314.941	0.886227			70	564.575	0.949381			70	2636.11	0.9555			70	247.803	0.830918
	80	382.08	0.903595			80	942.383	0.941984			80	547.485	0.944323			80					80	447.998	0.978658			80	496.826	0.946405			80	314.331				80	561.523	0.943757			80	2595.83	0.940592			80	264.282	0.896135
	90	370.483	0.872549			90	945.435	0.945103			90	527.954	0.909389			90					90	444.336	0.969512			90	486.45	0.924183			90	321.655				90	551.758	0.925759			90	2583.01	0.935848			90	245.972	0.823672
	100	367.432	0.864379			100	942.993	0.942608			100					100					100	428.467				100	487.061				100	314.331				100	546.265	0.915636			100	2577.51	0.933815			100	241.089	0.804348
	110	369.873	0.870915			110					110					110					110	419.922				110	470.581				110	301.514				110	546.875	0.91676			110	2482.91				110	250.854	0.842995
		z->	3.68786				z->	2.96601				z->	3.35526				z->	2.91073				z->	2.16986				z->	2.97518				z->	3.15639				z->	3.80351				z->	2.62566				z->	3.35129
		V1/2->	-39.5228				V1/2->	-38.5647				V1/2->	-42.527				V1/2->	-39.0641				V1/2->	-39.2488				V1/2->	-40.7852				V1/2->	-39.6767				V1/2->	-38.5843				V1/2->	-32.0227				V1/2->	-32.9893
Kv1.1 ShR4-1 cells		2019_06_26_0032.abf					2019_06_10_0086.abf					2019_06_10_0081.abf				2019_06_10_0091.abf					2019_06_10_0096.abf					2019_06_10_0074.abf					2019_06_10_0069.abf					2019_06_10_0064.abf					2019_04_30_0034.abf					2019_04_30_0027.abf
	Voltage (mV)	Tail Current Magnitude (pA)	Normalized Tail Current			Voltage (mV)	Tail Current Magnitude (pA)	Normalized Tail Current			Voltage (mV)	Tail Current Magnitude (pA)	Normalized Tail Current			Voltage (mV)	Tail Current Magnitude (pA)	Normalized Tail Current			Voltage (mV)	Tail Current Magnitude (pA)	Normalized Tail Current			Voltage (mV)	Tail Current Magnitude (pA)	Normalized Tail Current			Voltage (mV)	Tail Current Magnitude (pA)	Normalized Tail Current			Voltage (mV)	Tail Current Magnitude (pA)	Normalized Tail Current			Voltage (mV)	Tail Current Magnitude (pA)	Normalized Tail Current			Voltage (mV)	Tail Current Magnitude (pA)	Normalized Tail Current
	-130	55.542	0.0144231			-130	83.0078	0.0140406			-130	192.871	0.0073399			-130	72.6318	0.0036046			-130	39.0625	0.0052166			-130	115.356	0.0002661			-130	102.539	0.0079663			-130	240.479	0.0108747			-130	71.4111	0.0074974			-130	245.361	0.0151207
	-120	43.335	0.0037393			-120	89.7217	0.0226209			-120	175.781	0.0037965			-120	61.0352	0			-120	25.0244	0			-120	119.019	0.0018627			-120	92.1631	0			-120	226.44	0			-120	61.6455	0.0033609			-120	228.271	0.0119612
	-110	50.0488	0.0096154			-110	73.2422	0.0015601			-110	157.471	0			-110	66.5283	0.0017075			-110	38.4521	0.0049898			-110	134.888	0.0087813			-110	104.98	0.0098407			-110	230.103	0.0028369			-110	61.0352	0.0031024			-110	200.195	0.0067705
	-100	45.7764	0.0058761			-100	72.6318	0.00078			-100	194.702	0.0077196			-100	84.2285	0.0072093			-100	49.4385	0.0090724			-100	138.55	0.0103779			-100	93.3838	0.0009372			-100	231.323	0.0037825			-100	65.3076	0.0049121			-100	203.857	0.0074475
	-90	45.166	0.0053419			-90	72.0215	0			-90	223.389	0.0136674			-90	68.9697	0.0024663			-90	47.6074	0.0083919			-90	114.746	0			-90	95.8252	0.0028116			-90	247.803	0.0165485			-90	53.7109	0			-90	173.34	0.0018055
	-80	39.0625	0			-80	89.7217	0.0226209			-80	235.596	0.0161984			-80	79.9561	0.0058812			-80	59.2041	0.0127013			-80	123.291	0.0037254			-80	112.915	0.0159325			-80	253.296	0.0208038			-80	57.9834	0.0018097			-80	163.574	0
	-70	50.0488	0.0096154			-70	93.3838	0.0273011			-70	275.269	0.0244242			-70	109.253	0.0149877			-70	98.877	0.0274439			-70	126.953	0.005322			-70	134.277	0.0323336			-70	249.023	0.0174941			-70	68.9697	0.0064633			-70	168.457	0.0009027
	-60	87.2803	0.0422009			-60	111.084	0.049922			-60	395.508	0.0493546			-60	167.847	0.0332005			-60	233.765	0.0775686			-60	208.13	0.0407131			-60	141.602	0.0379569			-60	311.279	0.065721			-60	112.915	0.0250776			-60	237.427	0.0136538
	-50	231.934	0.168803			-50	189.209	0.149766			-50	803.223	0.13389			-50	482.788	0.131095			-50	559.692	0.198684			-50	389.404	0.119745			-50	256.958	0.126523			-50	393.066	0.129078			-50	301.514	0.104964			-50	563.965	0.0740239
	-40	613.403	0.502671			-40	380.249	0.393916			-40	1879.27	0.356998			-40	1205.44	0.35572			-40	1088.26	0.395101			-40	957.642	0.367483			-40	505.981	0.317713			-40	620.728	0.305437			-40	870.361	0.345915			-40	1829.22	0.307944
	-30	933.838	0.78312			-30	651.245	0.74025			-30	3065.19	0.602885			-30	1930.54	0.581104			-30	1738.28	0.636652			-30	1605.22	0.649814			-30	882.568	0.606842			-30	951.538	0.561702			-30	1500.24	0.61272			-30	3537.6	0.623787
	-20	1071.17	0.903312			-20	767.822	0.889236			-20	3947.75	0.785877			-20	2469.48	0.748625			-20	2029.42	0.74484			-20	2019.65	0.830495			-20	1159.06	0.819119			-20	1220.09	0.76974			-20	1925.66	0.792916			-20	4713.75	0.841232
	-10	1137.09	0.961004			-10	823.975	0.960998			-10	4494.02	0.899139			-10	2808.23	0.853918			-10	2482.3	0.913132			-10	2212.52	0.914582			-10	1280.52	0.912371			-10	1335.45	0.859102			-10	2172.24	0.897363			-10	5264.28	0.943015
	0	1148.68	0.971154			0	822.144	0.958658			0	4833.37	0.969501			0	3021.24	0.920129			0	2557.37	0.94103			0	2339.48	0.969931			0	1370.85	0.981724			0	1458.13	0.954137			0	2306.52	0.95424			0	5530.4	0.992214
	10	1181.64	1			10	823.364	0.960218			10	4939.58	0.991521			10	3138.43	0.956555			10	2644.65	0.973463			10	2408.45	1			10	1359.86	0.97329			10	1497.19	0.984397			10	2346.19	0.971044			10	5572.51	1
	20	1179.81	0.998397			20	831.299	0.970359			20	4980.47	1			20	3231.81	0.985581			20	2686.77	0.989113			20	2408.45	1			20	1376.95	0.98641			20	1517.33	1			20	2398.07	0.99302			20	5571.9	0.999887
	30	1176.15	0.995192			30	821.533	0.957878			30	4923.71	0.988231			30	3253.78	0.992411			30	2714.23	0.99932			30	2387.09	0.990687			30	1394.65	1			30	1505.74	0.991016			30	2412.11	0.998966			30	5447.39	0.976867
	40	1170.65	0.990385			40	854.492	1			40	4849.85	0.972918			40	3273.93	0.998672			40	2716.06	1			40	2390.75	0.992283			40					40	1509.4	0.993853			40	2398.07	0.99302			40	5324.1	0.954074
	50	1130.98	0.955662			50	826.416	0.964119			50	4741.21	0.950392			50	3278.2	1			50	2656.25	0.977773			50	2354.13	0.976317			50					50	1479.49	0.970686			50	2414.55	1			50
	60	1137.09	0.961004			60	824.585	0.961778			60	4611.82	0.923564			60					60	2640.38	0.971876			60					60					60	1505.74	0.991016			60					60
	70	1138.92	0.962607			70	810.547	0.943838			70	4490.36	0.89838			70					70	2529.3	0.930597			70					70					70	1480.71	0.971631			70					70
	80	1107.18	0.934829			80	814.209	0.948518			80	4427.49	0.885346			80					80	2475.59	0.910637			80					80					80	1447.75	0.946099			80					80
	90	1094.97	0.924145			90	812.988	0.946958			90	4345.7	0.868388			90					90	2413.33				90					90					90					90					90
	100	1083.37	0.913996			100	797.729	0.927457			100	4324.95	0.864085			100					100	2332.76				100					100					100					100					100
	110	1085.82	0.916133			110	779.419	0.904056			110	4252.32	0.849026			110					110	2236.33				110					110					110					110					110
		z->	3.48734				z->	3.33938				z->	2.6014				z->	2.33962				z->	2.26857				z->	2.94538				z->	2.87296				z->	2.48067				z->	2.77854				z->	3.41393
		V1/2->	-39.3526				V1/2->	-37.0633				V1/2->	-33.5181				V1/2->	-32.1974				V1/2->	-34.7502				V1/2->	-34.6975				V1/2->	-33.3802				V1/2->	-31.8161				V1/2->	-33.2563				V1/2->	-33.4572

## Sheet: Supplement 3
Figure 3 - Supplement 3A
1.2-1.1 dimer ShR4-1 cells		2019_09_25_0048.abf						2019_09_25_0054.abf						2019_09_25_0062.abf						Voltage (mV)	AVERAGE
	Voltage (mV)	Tail Current Magnitude (pA)	Normalized Tail Current				Voltage (mV)	Tail Current Magnitude (pA)	Normalized Tail Current				Voltage (mV)	Tail Current Magnitude (pA)	Normalized Tail Current					-130	0.017083
	-130	20.752	0.0194969				-130	-39.0625	0.0251457				-130	-97.0459	0.0066065					-120	0.0191767
	-120	26.8555	0.0257862				-120	-36.0107	0.0266789				-120	-101.318	0.005065					-110	0.0160007
	-110	20.1416	0.0188679				-110	-48.2178	0.0205458				-110	-91.5527	0.0085884					-100	0.0102136
	-100	15.2588	0.0138365				-100	-65.3076	0.0119595				-100	-101.929	0.0048447					-90	0.0077682
	-90	11.5967	0.0100629				-90	-67.1387	0.0110396				-90	-109.253	0.0022022					-80	0.0090236
	-80	14.6484	0.0132075				-80	-68.9697	0.0101196				-80	-104.98	0.0037437					-70	0.0059547
	-70	4.88281	0.0031447				-70	-59.8145	0.0147194				-70	-115.356	0					-60	0.0011745
	-60	1.83105	0				-60	-89.1113	0				-60	-105.591	0.0035235					-50	0.0159123
	-50	10.9863	0.009434				-50	-34.79	0.0272922				-50	-84.8389	0.0110108					-40	0.107755
	-40	95.8252	0.0968553				-40	194.092	0.142288				-40	117.798	0.0841224					-30	0.344186
	-30	321.655	0.32956				-30	749.512	0.421343				-30	665.283	0.281656					-20	0.649671
	-20	665.894	0.684277				-20	1349.49	0.722784				-20	1386.72	0.541951					-10	0.834539
	-10	830.078	0.853459				-10	1691.89	0.894818				-10	1978.15	0.75534					0	0.91541
	0	895.996	0.921384				0	1801.15	0.949709				0	2310.18	0.875138					10	0.97345
	10	972.29	1				10	1859.74	0.979147				10	2493.29	0.941202					20	0.986272
	20	968.628	0.996226				20	1875	0.986814				20	2589.11	0.975776					30	0.980029
	30	930.176	0.956604				30	1901.25	1				30	2610.47	0.983484					40	0.987384
	40	955.2	0.98239				40	1860.96	0.979761				40	2656.25	1					50	0.972193
	50	924.683	0.950943				50	1856.08	0.977308				50	2623.9	0.988329					60	0.971355
	60	948.486	0.975472				60	1823.73	0.961055				60	2593.99	0.977538					70	0.976371
	70	949.707	0.97673				70	1854.25	0.976388				70	2589.72	0.975997					80	0.951708
	80	914.307	0.940252				80	1816.41	0.957375				80	2538.45	0.957498					90	0.952641
	90	918.579	0.944654				90	1823.73	0.961055				90	2523.8	0.952213					100	0.942187
	100	936.89	0.963522				100	1798.71	0.948482				100	2419.43	0.914556					110	0.940276
	110	934.448	0.961006				110	1799.32	0.948789				110	2409.67	0.911033
		z->	3.45387					z->	3.37881					z->	2.72548						3.18605	0.400628	0.231303
		V1/2->	-24.746					V1/2->	-27.1339					V1/2->	-20.6919						-24.1906	3.25671	1.88026
1.2-1.1 dimer LM cells		2017_07_31_0005.abf						2017_07_31_0011_leak100.abf						2017_07_31_0017_leak200.abf						2017_07_31_0027_leak60.abf						2017_07_31_0033.abf						2017_08_02_0005_leak330.abf						2017_08_02_0005_leak330.abf						2017_08_02_0014_leak100.abf
	Voltage (mV)	Tail Current Magnitude (pA)	Normalized Tail Current				Voltage (mV)	Tail Current Magnitude (pA)	Normalized Tail Current				Voltage (mV)	Tail Current Magnitude (pA)	Normalized Tail Current				Voltage (mV)	Tail Current Magnitude (pA)	Normalized Tail Current				Voltage (mV)	Tail Current Magnitude (pA)	Normalized Tail Current				Voltage (mV)	Tail Current Magnitude (pA)	Normalized Tail Current				Voltage (mV)	Tail Current Magnitude (pA)	Normalized Tail Current				Voltage (mV)	Tail Current Magnitude (pA)	Normalized Tail Current				Voltage (mV)
	-130	20.752	0.0022148				-130	39.7656	0.0250184				-130	110.049	0.0086999				-130	35.8691	0.0031026				-130	32.959	0.0040816				-130	58.4961	0.0007187				-130	58.4961	0.0007187				-130	45.2588	0				-130
	-120	26.8555	0.0049834				-120	36.1035	0.0206034				-120	111.27	0.0090282				-120	26.1035	0				-120	39.6729	0.00553				-120	57.8857	0.0004792				-120	57.8857	0.0004792				-120	64.1797	0.0051624				-120
	-110	17.7002	0.0008306				-110	40.376	0.0257542				-110	103.945	0.0070584				-110	31.5967	0.0017452				-110	14.0381	0				-110	63.9893	0.0028749				-110	63.9893	0.0028749				-110	72.7246	0.0074938				-110
	-100	21.9727	0.0027685				-100	38.5449	0.0235467				-100	101.504	0.0064018				-100	33.4277	0.0023269				-100	30.5176	0.003555				-100	68.2617	0.004552				-100	68.2617	0.004552				-100	58.6865	0.0036636				-100
	-90	29.9072	0.0063677				-90	22.0654	0.0036792				-90	97.8418	0.0054169				-90	45.0244	0.0060112				-90	20.752	0.0014483				-90	56.665	0				-90	56.665	0				-90	80.0488	0.0094921				-90
	-80	18.9209	0.0013843				-80	26.9482	0.0095659				-80	88.6865	0.0029547				-80	39.5312	0.004266				-80	21.3623	0.00158				-80	67.6514	0.0043124				-80	67.6514	0.0043124				-80	70.8936	0.0069942				-80
	-70	15.8691	0				-70	25.1172	0.0073584				-70	77.7002	0				-70	30.9863	0.0015513				-70	29.2969	0.0032916				-70	66.4307	0.0038333				-70	66.4307	0.0038333				-70	92.8662	0.0129892				-70
	-60	16.4795	0.0002769				-60	19.0137	0				-60	96.0107	0.0049245				-60	51.1279	0.0079504				-60	40.8936	0.0057933				-60	80.4688	0.0093436				-60	80.4688	0.0093436				-60	88.5938	0.0118235				-60
	-50	73.8525	0.0263012				-50	48.9209	0.0360559				-50	135.073	0.0154301				-50	77.9834	0.0164825				-50	86.0596	0.0155365				-50	116.479	0.0234787				-50	116.479	0.0234787				-50	146.577	0.0276436				-50
	-40	237.427	0.100498				-40	111.787	0.111847				-40	414.004	0.0904465				-40	320.903	0.0936591				-40	404.663	0.084266				-40	338.647	0.110685				-40	338.647	0.110685				-40	405.977	0.098418				-40
	-30	828.247	0.368494				-30	282.075	0.317145				-30	1260.56	0.318122				-30	1211.41	0.376576				-30	1437.38	0.307044				-30	902.612	0.332056				-30	902.612	0.332056				-30	1215.3	0.319234				-30
	-20	1560.67	0.70072				-20	519.502	0.603385				-20	2345.77	0.60998				-20	2341.78	0.735699				-20	2791.75	0.59921				-20	1533.11	0.57954				-20	1533.11	0.57954				-20	2269.38	0.606828				-20
	-10	1977.54	0.889812				-10	668.428	0.782929				-10	3141.05	0.823867				-10	2963.12	0.933101				-10	3800.05	0.816721				-10	1977.44	0.753953				-10	1977.44	0.753953				-10	3016.45	0.810658				-10
	0	2135.62	0.961517				0	722.749	0.848418				0	3537.78	0.930565				0	3162.09	0.996316				0	4302.37	0.925082				0	2279.57	0.872544				0	2279.57	0.872544				0	3468.72	0.934055				0
	10	2178.34	0.980897				10	755.098	0.887417				10	3724.55	0.980795				10	3166.97	0.997867				10	4581.91	0.985385				10	2491.36	0.955678				10	2491.36	0.955678				10	3704.93	0.998501				10
	20	2200.32	0.990864				20	803.315	0.945548				20	3781.92	0.996225				20	3173.69	1				20	4644.78	0.998947				20	2604.27	1				20	2604.27	1				20	3710.42	1				20
	30	2220.46	1				30	822.236	0.968359				30	3795.96	1				30	3090.07	0.973434				30	4644.78	0.998947				30	2601.22	0.998802				30	2601.22	0.998802				30	3621.92	0.975854				30
	40	2210.08	0.995294				40	824.067	0.970567				40	3773.99	0.994091				40	3104.72	0.978088				40	4647.83	0.999605				40	2574.98	0.9885				40	2574.98	0.9885				40	3560.88	0.959201				40
	50	2213.75	0.996955				50	836.885	0.986019				50	3683.05	0.969632				50	3093.73	0.974598				50	4649.66	1				50	2538.35	0.974125				50	2538.35	0.974125				50	3482.76	0.937885				50
	60	2197.88	0.989756				60	826.509	0.97351				60	3598.82	0.94698				60	3055.28					60	4616.09	0.992758				60	2486.47	0.953761				60	2486.47	0.953761				60	3406.46	0.917069				60
	70	2166.14	0.97536				70	848.481	1				70	3529.85	0.928431				70	2989.36					70	4608.76	0.991178				70	2427.88	0.930762				70	2427.88	0.930762				70	3271.58	0.880266				70
	80	2182.62	0.982835				80	812.471	0.956586				80						80	2922.83					80	4539.18	0.976168				80	2359.52	0.903929				80	2359.52	0.903929				80	3194.06	0.859117				80
	90	2146	0.966224				90	846.04	0.997057				90						90	2872.78					90	4489.14					90	2286.89	0.875419				90	2286.89	0.875419				90						90
	100	2135.62	0.961517				100	839.326	0.988962				100						100	2844.1					100	4470.83					100	2228.3	0.85242				100	2228.3	0.85242				100						100
	110	2146.61	0.966501				110	839.937	0.989698				110						110	2789.78					110	4372.56					110	2149.56	0.821514				110	2149.56	0.821514				110						110
		z->	3.61122					z->	2.47336					z->	3.15862					z->	4.11284					z->	3.15461					z->	2.58443					z->	2.58443					z->	3.05889
		V1/2->	-25.8359					V1/2->	-22.1764					V1/2->	-23.2671					V1/2->	-26.5917					V1/2->	-22.8644					V1/2->	-22.0721					V1/2->	-22.0721					V1/2->	-23.2204
1.2-1.1 dimer + Slc7a5 ShR4-1		2019_09_25_0002leak.abf						2019_09_25_0004.abf						2019_09_25_0011.abf							Voltage (mV)	AVERAGE
	Voltage (mV)	Tail Current Magnitude (pA)	Normalized Tail Current				Voltage (mV)	Tail Current Magnitude (pA)	Normalized Tail Current				Voltage (mV)	Tail Current Magnitude (pA)	Normalized Tail Current						-130	0.0133063
	-130	90.2783	0				-130	117.837	0.0081142				-130	28.0762	0.0318047						-120	0.0100311
	-120	112.251	0.0104926				-120	100.137	0				-120	7.93457	0.0196006						-110	0.0063616
	-110	122.627	0.0154474				-110	108.071	0.0036374				-110	-24.4141	0						-100	0.029256
	-100	142.158	0.0247741				-100	154.458	0.0249021				-100	38.4521	0.0380917						-90	0.0455262
	-90	205.024	0.0547945				-90	159.951	0.0274203				-90	65.3076	0.0543639						-80	0.114505
	-80	365.547	0.131449				-80	302.163	0.0926133				-80	172.729	0.119453						-70	0.307414
	-70	798.286	0.338094				-70	660.439	0.256855				-70	515.747	0.327293						-60	0.560515
	-60	1305.49	0.580297				-60	1216.47	0.511752				-60	948.486	0.589497						-50	0.74406
	-50	1644.23	0.742058				-50	1658.97	0.714606				-50	1255.49	0.775518						-40	0.868007
	-40	1856.64	0.843486				-40	2001.99	0.871852				-40	1442.26	0.888683						-30	0.932973
	-30	1970.77	0.897989				-30	2175.94	0.951595				-30	1542.36	0.949334						-20	0.966928
	-20	2044.01	0.932964				-20	2256.51	0.988528				-20	1591.8	0.97929						-10	0.980306
	-10	2100.17	0.959778				-10	2281.53	1				-10	1594.85	0.981139						0	0.982245
	0	2100.17	0.959778				0	2279.7	0.999161				0	1605.84	0.987796						10	0.988055
	10	2138.01	0.977849				10	2281.53	1				10	1603.39	0.986317						20	0.989993
	20	2135.57	0.976683				20	2269.33	0.994404				20	1624.15	0.998891						30	0.977707
	30	2136.79	0.977266				30	2247.35	0.984331				30	1578.98	0.971524						40	0.98633
	40	2172.19	0.994171				40	2246.74	0.984051				40	1594.24	0.980769						50	0.977587
	50	2144.11	0.980764				50	2230.87	0.976777				50	1585.08	0.975222						60	0.970469
	60	2115.42	0.967065				60	2235.15	0.978735				60	1569.21	0.965607						70	0.974869
	70	2102.61					70	2243.69	0.982653				70	1571.66	0.967086						80	0.995962
	80	2094.67					80	2273.6	0.996363				80	1618.65	0.995562						90	0.980351
	90	2104.44					90	2257.12	0.988808				90	1579.59	0.971893						100	0.997062
	100	2136.18					100	2268.72	0.994124				100	1625.98	1						110	0.969851
	110	2184.39					110	2254.07	0.987409				110	1547.24	0.952293
		z->	2.19062					z->	2.62356					z->	2.56419							2.45946	0.234705	0.135507
		V1/2->	-61.711					V1/2->	-59.5886					V1/2->	-62.6324							-61.3107	1.5609	0.901186
1.2-1.1 dimer + Slc7a5 LM cells		2017_07_31_0040_leak200.abf						2017_07_31_0047_leak200.abf						2017_07_31_0054_leak100.abf						2017_07_31_0061_leak120.abf				2017_08_02_0155_leak210.abf						Voltage (mV)	AVERAGE
	Voltage (mV)	Tail Current Magnitude (pA)	Normalized Tail Current				Voltage (mV)	Tail Current Magnitude (pA)	Normalized Tail Current				Voltage (mV)	Tail Current Magnitude (pA)	Normalized Tail Current				Voltage (mV)	Tail Current Magnitude (pA)	Normalized Tail Current			Voltage (mV)	Tail Current Magnitude (pA)	Normalized Tail Current				-130	0.0026961
	-130	32.5342	0.0089615				-130	36.8066	0				-130	47.7002	0				-130	63.1348	0.004519			-130	183.35	0				-120	0.0083869
	-120	39.8584	0.0152873				-120	48.4033	0.0066248				-120	62.3486	0.0162272				-120	58.8623	0			-120	196.167	0.0037954				-110	0.0133557
	-110	22.1582	0				-110	60.6103	0.0135983				-110	82.4902	0.0385396				-110	67.4072	0.0090381			-110	202.271	0.0056027				-100	0.0243643
	-100	73.4277	0.0442804				-100	55.7275	0.0108089				-100	75.166	0.030426				-100	87.5488	0.0303422			-100	203.491	0.0059642				-90	0.0268407
	-90	61.2207	0.0337375				-90	73.4277	0.0209205				-90	89.2041	0.045977				-90	82.0557	0.024532			-90	213.867	0.0090367				-80	0.0576004
	-80	102.725	0.0695836				-80	102.725	0.0376569				-80	114.839	0.0743746				-80	132.104	0.0774693			-80	281.006	0.0289174				-70	0.163028
	-70	190.615	0.145493				-70	240.664	0.116458				-70	257.661	0.23259				-70	257.227	0.209813			-70	557.495	0.11079				-60	0.375039
	-60	414.004	0.338429				-60	663.027	0.357741				-60	509.126	0.511156				-60	413.477	0.375081			-60	1172.12	0.292789				-50	0.628914
	-50	724.062	0.60622				-50	1128.73	0.62378				-50	733.125	0.759297				-50	657.617	0.633312			-50	1946.04	0.521959				-40	0.8088
	-40	949.893	0.801265				-40	1440.62	0.801953				-40	866.182	0.906694				-40	805.933	0.790187			-40	2695.56	0.7439				-30	0.910084
	-30	1053.04	0.890353				-30	1588.32	0.886332				-30	927.827	0.974983				-30	919.458	0.910265			-30	3183.84	0.888487				-20	0.967833
	-20	1114.69	0.943595				-20	1738.47	0.972106				-20	950.41	1				-20	962.183	0.955455			-20	3452.39	0.96801				-10	0.989528
	-10	1160.46	0.983131				-10	1748.84	0.978034				-10	938.203	0.986477				-10	1004.3	1			-10	3560.42	1				0	0.992777
	0	1180	1				0	1787.29	1				0	938.203	0.986477				0	991.479	0.986443			0	3529.91	0.990963				10	0.983131
	10	1170.23	0.991566				10	1779.36	0.995467				10	929.658	0.977012				10	972.559	0.96643			10	3510.38	0.98518				20	0.977258
	20	1156.19	0.979441				20	1776.31	0.993724				20	905.854	0.950642				20	982.324	0.976759			20	3512.21	0.985722				30	0.971247
	30	1148.26	0.972588				30	1778.75	0.995119				30	894.258	0.937796				30	986.597	0.981278			30	3457.28	0.969456				40	0.953497
	40	1133	0.95941				40	1773.87	0.992329				40	858.857	0.89858				40	967.676	0.961265			40	3411.5	0.955901				50	0.948093
	50	1149.48	0.973643				50	1765.93	0.987796				50	851.533	0.890467				50	956.689	0.949645			50	3354.13	0.938912				60	0.944968
	60	1151.92	0.975751				60	1753.12	0.980474				60	853.975	0.893171				60	960.352	0.953518			60	3296.75	0.921923				70	0.932311
	70	1142.76	0.967844				70	1722.6	0.96304				70	832.612	0.869506				70	960.352	0.953518			70	3248.54	0.907645				80	0.921982
	80	1126.28	0.953611				80	1748.84	0.978034				80	821.016	0.85666				80	931.665	0.923176			80	3217.41	0.898428				90	0.915914
	90	1136.05	0.962045				90	1720.77	0.961994				90	816.133	0.851251				90	937.158	0.928986			90	3139.28	0.875294				100	0.908787
	100	1130.56	0.957301				100	1711.61	0.956764				100	814.302	0.849222				100	928.613				100	3127.69	0.87186				110	0.907409
	110	1098.21	0.929362				110	1695.74	0.947699				110	810.64	0.845166				110	893.823				110	3077.03
		z->	2.52468					z->	2.72617					z->	2.97183					z->	2.37849				z->	2.64789				z->	2.64981	0.222937	0.0997002
		V1/2->	-53.5528					V1/2->	-53.772					V1/2->	-60.0438					V1/2->	-55.035				V1/2->	-50.752				V1/2->	-54.6311	3.40621	1.5233
Figure 3 - Supplement 3C and D
1.2-1.1 dimer LM cells						1.2-1.1 dimer ShR4-1 cells						1.2-1.1 dimer + Slc7a5 LM cells						1.2-1.1 dimer + Slc7a5 ShR4-1 cells
	initial	post -120mV	Fold change				initial	post -120mV	Fold change				initial	post -120mV	Fold change				initial	post -120mV	Fold change
2019_09_26_0001.abf	498.75	561.099	1.12501			2019_09_25_0046leak.abf	133.362	139.949	1.04939			2017_07_31_0039_leak80.abf	14.1015	127.634	9.05109			2019_09_25_0000.abf	12.6478	82.6514	6.53484
2019_09_26_0008leak.abf	15.2681	18.4002	1.20514			2019_09_25_0049.abf	194.43	199.577	1.02647			2017_07_31_0045_leak170.abf	29.0906	321.603	11.0552			2019_09_25_0014leak.abf	45.4534	397.835	8.7526
2019_09_26_0016.abf	1747.78	1806.48	1.03358			2019_09_25_0053.abf	356.667	578.724	1.62259			2017_07_31_0053_leak60.abf	36.3778	130.479	3.58677			2019_09_25_0007.abf	127.147	282.406	2.2211
2019_09_26_0021leak.abf	349.339	303.586	0.86903			2019_09_25_0059.abf	1205.55	1707.78	1.4166			2017_07_31_0060_leak80.abf	16.5226	96.2774	5.82701
2019_09_26_0022.abf	336.612	395.324	1.17442									2017_07_31_0065_leak450.abf	224.92	281.86	1.25316
2017_07_31_0001.abf	374.02	432.759	1.15705									2017_08_02_0148_leak450.abf	54.8268	474.002	8.64544
2017_07_31_0007.abf	67.3308	78.9774	1.17298									2017_08_02_0154_leak140.abf	50.0035	347.099	6.9415
2017_07_31_0013_leak130.abf	715.436	688.554	0.962426
2017_07_31_0022_leak210.abf	378.057	434.852	1.15023
2017_07_31_0029_leak350.abf	493.214	603.258	1.22312
2017_08_02_0001_leak350.abf	821.036	564.864	0.687989
2017_08_02_0010_leak60.abf	816.299	859.953	1.05348
2017_08_02_0016_leak100.abf	280.424	374.224	1.33449
[truncated: 19 more columns]
