# Supplementary material for: Control of Slc7a5 sensitivity by the voltage-sensing domain of Kv1 channels
Source: eLife. 2020 Nov 9;9:e54916. doi: 10.7554/eLife.54916 (PMC7690953; doi:10.7554/eLife.54916)
Supplement: Figure 4—source data 1. [file elife-54916-fig4-data1.xlsx]

## Sheet: Main Figure
Figure 4C
WT Kv1.1	initial	post -120mV	Fold change			WT Kv1.1 + BCH 3-6 Hours	initial	post -120mV	Fold change			WT Kv1.1 + Overnight BCH	initial	post -120mV	Fold change			WT Kv1.1 + Slc7a5 + Overnight BCH	initial	post -120mV	Fold change			WT Kv1.1 + Rapamycin 3-6 Hours	initial	post -120mV	Fold change			WT Kv1.1 + Rapamycin Overnight	initial	post -120mV	Fold change			WT Kv1.1 + Slc7a5 + Rapamycin Overnight	initial	post -120mV	Fold change
6.19.2019.1.1	36.4694	94.415	2.58888			6.19.2019.7.1	171.49	388.618	2.26612			2020_06_15_0022.abf	43.8672	441.366	10.0614			2020_06_15_0076Leak.abf	2.8894	28.575	9.8896			6.25.2019.2.1	47.1202	85.8525	1.82199			2020_06_12_0030Leak.abf	94.3256	343.217	3.63864			2020_06_12_0000Leak.abf	6.05845	41.7405	6.88964
6.19.2019.2.1	41.24	180.95	4.38773			6.20.2019.11.1	28.0129	77.9655	2.7832			2020_06_15_0026.abf	29.4987	100.467	3.40582			2020_06_15_0078Leak.abf	7.94005	55.3148	6.96655			6.25.2019.3.1	51.6667	301.953	5.84426			2020_06_12_0036.abf	93.994	220.337	2.34416			2020_06_12_0006Leak.abf	5.76685	54.3541	9.42525
6.19.2019.3.1 and .3	135.35	322.55	2.38308			6.20.2019.12.1	88.4314	333.928	3.77613			2020_06_15_0027Leak.abf	32.6979	188.338	5.75992			2020_06_25_0017Leak.abf	2.5937	16.6153	6.40603			6.25.2019.4.1 and .2	74.2403	190.581	2.56709			2020_06_12_0043.abf	7.12699	43.6977	6.1313			2020_06_12_0011Leak.abf	4.10156	25.6434	6.2521
6.19.2019.4.1	18.302	55.8524	3.05171			6.20.2019.13.1	53.4793	120.183	2.24729			2020_06_15_0031.abf	13.0835	98.5758	7.53436			2020_06_25_0020Leak.abf	13.4691	94.4824	7.01474			6.25.2019.5.3	332.042	466.675	1.40547			2020_06_12_0044Leak.abf	20.2646	159.318	7.86186			2020_06_12_0013.abf	5.24015	30.7845	5.87474
6.19.2019.5.1	201.035	408.91	2.03403			6.20.2019.14.1	126.069	267.428	2.12128			2020_06_15_0033Leak.abf	239.124	797.216	3.33391			2020_06_25_0027Leak.abf	2.8711	50.2987	17.519			6.25.2019.6.1	230.939	261.614	1.13283			2020_06_12_0045.abf	195.59	372.592	1.90496			2020_06_12_0017Leak.abf	4.13281	29.4624	7.1289
6.19.2019.6.1	64.9597	106.016	1.63203			6.20.2019.15.1	75.3052	172.409	2.28947			2020_06_15_0035Leak.abf	17.6159	87.44	4.9637			2020_06_25_0031Leak.abf	5.06257	47.6196	9.40621			6.25.2019.7.1	32.9387	84.3681	2.56137			2020_06_22_0001.abf	88.1617	173.611	1.96924			2020_06_22_0021Leak.abf	15.2371	173.224	11.3686
6.20.2019.1.1	60.9252	103.531	1.69931			6.20.2019.16.1	122.402	380.76	3.11073			2020_06_15_0037Leak.abf	12.1512	80.1619	6.59701			2020_06_25_0033.abf	1.12221	19.6387	17.5			6.25.2019.8.1	49.5325	104.305	2.10579			2020_06_22_0005.abf	244.499	478.588	1.95742			2020_06_25_0000leak.abf	4.16519	69.4821	16.6816
6.20.2019.2.1	51.7388	122.771	2.37289			6.20.2019.17.1	63.8333	228.753	3.5836			2020_06_23_0000Leak.abf	99.5387	164.77	1.65534			2020_06_25_0036.abf	2.84247	51.925	18.2675			6.25.2019.9.1	42.9818	163.721	3.80908			2020_06_22_0008.abf	183.105	635.235	3.46923			2020_06_25_0006Leak.abf	4.14165	25.0221	6.04157
6.20.2019.3.1	67.3809	179.976	2.67103			6.21.2019.1.1	15.7786	88.5429	5.61159			2020_06_23_0002.abf	75.6304	228.218	3.01755									6.25.2019.10.1	88.1728	148.228	1.68111			2020_06_22_0012.abf	17.4658	141.977	8.12889			2020_06_25_0008.abf	5.1645	52.5842	10.1819
6.20.2019.4.1 and .3	30.0357	266.851	8.88446			6.21.2019.2.1	11.7692	101.093	8.58964			2020_06_23_0006Leak.abf	18.3401	141.173	7.69753									6.26.2019.5.1	533.316	915.421	1.71647			2020_06_22_0013.abf	35.3362	122.07	3.45455			2020_06_25_0011Leak.abf	9.42772	35.8363	3.80117
6.20.2019.5.1	87.7391	389.835	4.44311			6.27.2019.1.1	40.2685	130.12	3.23132			2020_06_23_0011Leak.abf	21.6805	88.367	4.07587									6.26.2019.6.1	262.61	595.639	2.26816									2020_06_25_0012Leak.abf	11.168	139.873	12.5244
6.20.2019.6.1 and .2	49.8034	241.521	4.84949			6.27.2019.2.1	10.31	123.31	11.9602															6.26.2019.7.1	91.3525	110.043	1.2046
6.20.2019.7.1	31.5882	52.6364	1.66633			6.27.2019.3.1 and .2	15.4845	160.289	10.3515															6.26.2019.8.1	27.223	101.737	3.73716
6.20.2019.8.1	102.228	261.348	2.55653			6.27.2019.4.1	15.0867	32.22	2.13566															6.26.2019.9.1 and .2	50.5966	214.328	4.23601
6.20.2019.9.1	41	220.261	5.37223			6.27.2019.5.1	37.5721	110.67	2.94553															7.4.2019.2.1	40.7338	101.201	2.48446
6.20.2019.10.1	264.266	614.723	2.32615			6.27.2019.6.1	71.3538	155.485	2.17906															7.4.2019.3.1	131.919	321.977	2.44071
6.26.2019.1.1	71.0168	93.4622	1.31606			6.27.2019.7.1	29.8095	75.3274	2.52696															7.4.2019.4.1	93.7547	149.679	1.5965
6.26.2019.2.1	79.4852	367.317	4.6212			6.27.2019.8.1	16.9755	28.2209	1.66245															7.4.2019.5.1	90.5282	140.725	1.55449
6.26.2019.3.1	158.262	423.299	2.67468			6.27.2019.9.1	92.6338	151.387	1.63426															7.4.2019.6.1	36.0192	50.0513	1.38957
6.26.2019.4.1	100.509	267.08	2.65729			6.27.2019.10.1	28.0291	79.1163	2.82265															7.4.2019.7.1	30.0932	55.7267	1.85181
Figure 4 D, E and F
		Kv1.1 Nanoluc							EGFP Kv1.1							EGFP Slc7a5								EGFP Slc7a6
		March 9th	March 13th						March 9th	March 13th						March 9th	March 13th (1)	March 13th (2)						March 13th (1)	March 13th (2)
					Average							Average	Average Nanoluc substracted							Average	Nanoluc substracted						Average	Nanoluc substracted
400		57	77		67				134	73		103.5	36.5			173	77	90		113.333	46.3333			53	53		53	-14
410		392	556		474				860	478		669	195			1123	458	563		714.667	240.667			283	384		333.5	-140.5
420		1444	1859		1651.5				3039	1566		2302.5	651			3978	1579	2000		2519	867.5			1016	1356		1186	-465.5
430		3555	4532		4043.5				7557	3904		5730.5	1687			9994	3893	4850		6245.67	2202.17			2481	3238		2859.5	-1184
440		5115	6543		5829				10809	5731		8270	2441			14582	5553	6843		8992.67	3163.67			3543	4814		4178.5	-1650.5
450		6439	8192		7315.5				13605	7023		10314	2998.5			18135	6964	8601		11233.3	3917.83			4283	5923		5103	-2212.5
460		7054	8974		8014				15181	7742		11461.5	3447.5			20019	7532	9320		12290.3	4276.33			4816	6532		5674	-2340
470		6551	8077		7314				13861	7036		10448.5	3134.5			18362	6885	8535		11260.7	3946.67			4418	5962		5190	-2124
480		5958	7415		6686.5				12711	6442		9576.5	2890			16511	6278	7685		10158	3471.5			3944	5458		4701	-1985.5
490		3655	4561		4108				8660	4252		6456	2348			10756	4031	5006		6597.67	2489.67			2398	3279		2838.5	-1269.5
500		2947	3618		3282.5				7873	3910		5891.5	2609			8859	3352	4255		5488.67	2206.17			1944	2661		2302.5	-980
510		2109	2620		2364.5				6912	3241		5076.5	2712			7237	2772	3610		4539.67	2175.17			1457	1975		1716	-648.5
520		1590	1999		1794.5				5306	2626		3966	2171.5			5400	2094	2764		3419.33	1624.83			1079	1446		1262.5	-532
530		1130	1455		1292.5				3650	1749		2699.5	1407			3867	1377	1865		2369.67	1077.17			760	1044		902	-390.5
540		789	930		859.5				2523	1184		1853.5	994			2573	986	1250		1603	743.5			511	702		606.5	-253
550		503	628		565.5				1665	783		1224	658.5			1772	594	876		1080.67	515.167			335	489		412	-153.5
560		360	437		398.5				1159	561		860	461.5			1133	460	585		726	327.5			234	313		273.5	-125
570		273	287		280				756	345		550.5	270.5			804	336	406		515.333	235.333			178	231		204.5	-75.5
580		168	195		181.5				491	202		346.5	165			559	185	245		329.667	148.167			115	142		128.5	-53
590		114	152		133				341	141		241	108			407	133	180		240	107			88	108		98	-35
600		78	81		79.5				222	92		157	77.5			263	105	122		163.333	83.8333			58	84		71	-8.5
610		55	63		59				162	81		121.5	62.5			182	62	77		107	48			38	52		45	-14
620		29	34		31.5				85	49		67	35.5			98	48	61		69	37.5			30	40		35	3.5
630		18	30		24				71	33		52	28			85	35	33		51	27			16	18		17	-7
640		20	15		17.5				48	24		36	18.5			69	21	28		39.3333	21.8333			8	16		12	-5.5
650		14	16		15				24	18		21	6			32	14	36		27.3333	12.3333			9	10		9.5	-5.5
																Kv1.1 Slc7a5
400		0.00808052	0.00858034		0.00833043				0.00882682	0.0094291		0.00912796	0.000797523			0.00864179	0.010223	0.00965665		0.00950716	0.00117673			0.011005	0.0081139		0.00955944	0.00122901
410		0.0555713	0.0619568		0.058764				0.0566498	0.0617412		0.0591955	0.000431421			0.0560967	0.0608072	0.0604077		0.0591039	0.00033985			0.0587625	0.0587875		0.058775	1.09475e-05
420		0.204707	0.207154		0.20593				0.200184	0.202273		0.201229	-0.0047014			0.198711	0.209639	0.214592		0.207647	0.00171718			0.210963	0.207593		0.209278	0.00334815
430		0.503969	0.505014		0.504492				0.497793	0.504262		0.501028	-0.00346405			0.499226	0.516861	0.520386		0.512158	0.00766587			0.515158	0.495713		0.505436	0.000943677
440		0.72512	0.729106		0.727113				0.712008	0.740248		0.726128	-0.000985188			0.728408	0.737254	0.734227		0.733297	0.00618322			0.735673	0.736987		0.73633	0.00921655
450		0.912815	0.912859		0.912837				0.896186	0.90713		0.901658	-0.0111794			0.905889	0.924588	0.922854		0.917777	0.0049399			0.889327	0.906767		0.898047	-0.0147904
460		1	1		1				1	1		1	0			1	1	1		1	0			1	1		1	0
470		0.928693	0.900045		0.914369				0.913049	0.908809		0.910929	-0.00343961			0.917229	0.9141	0.915773		0.9157	0.00133158			0.917359	0.912737		0.915048	0.000679292
480		0.844627	0.826276		0.835452				0.837297	0.832085		0.834691	-0.000760858			0.824766	0.83351	0.824571		0.827616	-0.00783565			0.818937	0.835579		0.827258	-0.00819375
490		0.518146	0.508246		0.513196				0.57045	0.549212		0.559831	0.0466351			0.53729	0.535183	0.537124		0.536532	0.0233365			0.497924	0.50199		0.499957	-0.013239
500		0.417777	0.403165		0.410471				0.518609	0.505038		0.511823	0.101352			0.44253	0.445035	0.456545		0.448036	0.0375655			0.403654	0.407379		0.405517	-0.00495415
510		0.298979	0.291955		0.295467				0.455306	0.418626		0.436966	0.141499			0.361507	0.36803	0.387339		0.372292	0.0768249			0.302533	0.302358		0.302445	0.00697851
520		0.225404	0.222755		0.224079				0.349516	0.339189		0.344352	0.120273			0.269744	0.278014	0.296567		0.281441	0.057362			0.224045	0.221372		0.222708	-0.00137105
530		0.160193	0.162135		0.161164				0.240432	0.225911		0.233171	0.0720074			0.193166	0.18282	0.200107		0.192031	0.0308673			0.157807	0.159829		0.158818	-0.002346
540		0.111851	0.103633		0.107742				0.166195	0.152932		0.159563	0.0518212			0.128528	0.130908	0.13412		0.131185	0.0234433			0.106105	0.107471		0.106788	-0.000954293
550		0.0713071	0.0699799		0.0706435				0.109677	0.101137		0.105407	0.0347631			0.0885159	0.0788635	0.0939914		0.0871236	0.0164801			0.0695598	0.0748622		0.072211	0.00156751
560		0.0510349	0.0486962		0.0498656				0.0763454	0.0724619		0.0744037	0.0245381			0.0565962	0.0610728	0.0627682		0.0601457	0.0102802			0.048588	0.0479179		0.048253	-0.00161256
570		0.0387014	0.0319813		0.0353414				0.0497991	0.0445621		0.0471806	0.0118392			0.0401618	0.0446097	0.0435622		0.0427779	0.00743655			0.0369601	0.0353644		0.0361622	0.000820884
580		0.0238163	0.0217294		0.0227729				0.0323431	0.0260914		0.0292173	0.0064444			0.0279235	0.0245619	0.0262876		0.0262576	0.00348477			0.0238787	0.0217391		0.0228089	3.60765e-05
590		0.016161	0.0169378		0.0165494				0.0224623	0.0182123		0.0203373	0.00378789			0.0203307	0.017658	0.0193133		0.0191007	0.00255123			0.0182724	0.016534		0.0174032	0.000853774
600		0.0110576	0.00902607		0.0100418				0.0146235	0.0118832		0.0132534	0.00321157			0.0131375	0.0139405	0.0130901		0.0133894	0.00334757			0.0120432	0.0128598		0.0124515	0.00240966
610		0.007797	0.00702028		0.00740864				0.0106712	0.0104624		0.0105668	0.00315819			0.00909136	0.00823154	0.0082618		0.00852824	0.0011196			0.00789036	0.00796081		0.00792559	0.000516948
620		0.00411114	0.00378872		0.00394993				0.0055991	0.0063291		0.00596411	0.00201418			0.00489535	0.00637281	0.00654506		0.00593774	0.00198781			0.00622924	0.0061237		0.00617647	0.00222653
630		0.00255174	0.00334299		0.00294737				0.0046769	0.0042625		0.00446968	0.00152231			0.00424597	0.00464684	0.00354077		0.00414453	0.00119716			0.00332226	0.00275566		0.00303896	9.1594e-05
640		0.00283527	0.0016715		0.00225338				0.00316185	0.0031		0.00313091	0.000877528			0.00344673	0.0027881	0.00300429		0.00307971	0.000826324			0.00166113	0.00244948		0.0020553	-0.000198079
650		0.00198469	0.00178293		0.00188381				0.00158092	0.002325		0.00195295	6.91435e-05			0.00159848	0.00185874	0.00386266		0.00243996	0.00055615			0.00186877	0.00153093		0.00169985	-0.000183961
		0.000559741	0.00206834		0.00131404				0.00130604	0.0029171		0.00211156	0.000797523			0.00112101	0.00371104	0.00314465		0.0026589	0.00134486			0.00449298	0.00160189		0.00304744	0.0017334
		0.00398139	0.00456971		0.00427555				0.00505984	0.0043541		0.00470697	0.00043142			0.00450679	0.00342017	0.00302067		0.00364921	-0.00062634			0.0013754	0.00140045		0.00138793	-0.00288762
		0.0194578	0.0093518		0.0144048				0.0149357	0.0044711		0.00970342	-0.0047014			0.0134625	0.0118367	0.0167901		0.0140298	-0.000375065			0.0131613	0.00979119		0.0114762	-0.0029286
		0.0181533	0.030452		0.0243027				0.0119772	0.0297		0.0208386	-0.00346405			0.0134097	0.0422989	0.0458238		0.0338441	0.00954147			0.0405953	0.0211509		0.0308731	0.00657048
		0.0085352	0.0315076		0.0200214				-0.0045769	0.0426493		0.0190362	-0.000985189			0.0118227	0.0396557	0.0366288		0.0293691	0.00934765			0.0380741	0.0393884		0.0387313	0.0187098
		0.0144119	0.0105395		0.0124757				-0.0022175	0.00481		0.00129629	-0.0111794			0.00748592	0.0222685	0.0205342		0.0167629	0.00428717			-0.0129927	0.00444678		-0.0042729	-0.0167486
		0	0		0				0	0		0	0			0	0	0		0	0			0	0		0
		0.00733128	0.00505068		0.00619098				-0.0083125	0.0138152		0.00275137	-0.00343961			-0.004133	0.0191059	0.0207786		0.0119172	0.00572621			0.0223649	0.0177434		0.0200541	0.0138632
		0.00942463	0.00820509		0.00881486				0.00209409	0.0140139		0.008054	-0.000760859			-0.0104361	0.0154395	0.0065		0.00383449	-0.00498037			0.000866059	0.0175079		0.00918697	0.000372105
		0.00119099	-0.0180055		-0.00840725				0.0534952	0.0229606		0.0382279	0.0466351			0.0203348	0.00893169	0.0108729		0.0133798	0.0217871			-0.0283279	-0.0242613		-0.0262946	-0.0178874
		0.00347447	-0.0140107		-0.00526813				0.104306	0.087862		0.0960841	0.101352			0.0282269	0.0278591	0.0393696		0.0318186	0.0370867			-0.0135209	-0.00979636		-0.0116586	-0.00639052
		-0.0147824	-0.0234708		-0.0191266				0.141544	0.1032		0.122372	0.141499			0.0477449	0.0526044	0.0719137		0.057421	0.0765476			-0.0128921	-0.0130677		-0.0129799	0.0061467
		-0.00813602	0.000532402		-0.00380181				0.115976	0.116967		0.116471	0.120273			0.0362037	0.0557916	0.0743443		0.0554465	0.0592483			0.00182263	-0.000850514		0.00048606	0.00428787
		-0.00394495	-0.0185731		-0.011259				0.0762944	0.0452024		0.0607484	0.0720074			0.0290287	0.00211179	0.0193991		0.0168465	0.0281056			-0.0229009	-0.0208796		-0.0218903	-0.0106312
		-0.00280749	-0.0160254		-0.00941645				0.0515357	0.0332739		0.0424048	0.0518212			0.013869	0.01125	0.0144621		0.0131937	0.0226101			-0.0135535	-0.0121872		-0.0128703	-0.00345389
		-0.000997994	-0.00490813		-0.00295306				0.0373715	0.0262486		0.03181	0.0347631			0.0162109	0.00397544	0.0191033		0.0130965	0.0160496			-0.00532827	-2.59e-05		-0.0026771	0.000275997
		-2.73e-05	-0.00299282		-0.00151005				0.0252833	0.0207728		0.0230281	0.0245381			0.00553409	0.00938371	0.0110792		0.00866566	0.0101757			-0.00310101	-0.00377111		-0.0034361	-0.00192602
		0.00175726	-0.00179976		-2.12485e-05				0.0128549	0.0107811		0.011818	0.0118392			0.00321766	0.0108286	0.0097812		0.0079425	0.00796374			0.0031791	0.00158333		0.00238121	0.00240246
		-6.55e-05	-0.00146958		-0.000767544				0.00846128	0.0028924		0.00567685	0.0064444			0.00404169	0.00136285	0.00308853		0.00283102	0.00359857			0.000679714	-0.00145989		-0.0003901	0.000377454
		-0.000727728	-0.0013772		-0.00105246				0.00557352	-0.0001027		0.00273542	0.00378789			0.00344191	-0.000657026	0.000998286		0.00126106	0.00231352			-4.26e-05	-0.00178103		-0.0009118	0.00014065
		-0.00160902	-0.00399794		-0.00280348				0.00195696	-0.0011408		0.00040809	0.00321157			0.00047094	0.000916507	6.61e-05		0.000484521	0.003288			-0.000980824	-0.000164246		-0.0005725	0.00223095
		-0.000911278	-0.00315473		-0.002033				0.00196296	0.0002874		0.00112518	0.00315819			0.00038309	-0.00194346	-0.00191321		-0.00115786	0.000875143			-0.00228465	-0.0022142		-0.0022494	-0.00021642
		-0.000638824	-0.00313028		-0.00188455				0.00084914	-0.0005899		0.00012962	0.00201418			0.00014538	-0.000546198	-0.000373943		-0.000258253	0.0016263			-0.000689771	-0.000795308		-0.0007425	0.00114201
		-0.000746845	-0.00113401		-0.00094043				0.00137831	-0.0002145		0.00058189	0.00152231			0.00094738	0.000169836	-0.000936232		6.03273e-05	0.00100076			-0.00115474	-0.00172134		-0.001438	-0.000497613
		0.0001964	-0.00036351		-8.35535e-05				0.00052298	0.001065		0.00079397	0.000877528			0.00080786	0.000753102	0.00096929		0.000843416	0.000926969			-0.000373872	0.000414477		2.0303e-05	0.000103856
		5.54e-06	-0.00065907		-0.000326769				-0.0003982	-0.000117		-0.00025763	6.91432e-05			-0.0003807	-0.000583266	0.00142066		0.000152241	0.000479009			-0.000573232	-0.000911078		-0.0007422	-0.000415386
		0.530846	-0.127954		0.201446				6.59234	5.86079		6.22657	6.02512			2.47468	3.39945	4.26866		3.38093	3.17948			0.0789451	0.21142		0.145182	-0.0562637
EGFP Kv1.1
March 9th
	wavelength	400	410	420	430	440	450	460	470	480	490	500	510	520	530	540	550	560	570	580	590	600	610	620	630	640	650
Nanoluc substract	Raw data	0.000746301	0.00107845	-0.00452	-0.00617609	-0.01311	-0.01663	0	-0.0156437	-0.0073305	0.0523042	0.100832	0.156327	0.124112	0.0802393	0.0543431	0.0383695	0.0253106	0.0110976	0.00852679	0.00630124	0.00356599	0.00287424	0.00148796	0.00212516	0.000326576	-0.0004038
	x 10	0.00746301	0.0107845	-0.04522	-0.0617608	-0.13112	-0.16629	0	-0.156437	-0.0733054	0.523042	1.00832	1.56327	1.24112	0.802393	0.543432	0.383695	0.253106	0.110976	0.0852679	0.0630124	0.0356599	0.0287424	0.0148796	0.0212516	0.00326576	-0.0040377	Sum (Area 460 to 620)
																												6.42716
March 13th
	wavelength	400	410	420	430	440	450	460	470	480	490	500	510	520	530	540	550	560	570	580	590	600	610	620	630	640	650
Nanoluc substract	Raw data	0.00109866	0.00297712	-0.00366	-0.000229469	0.013135	-0.00571	0	-0.0055597	-0.0033668	0.0360162	0.0945665	0.123159	0.11511	0.0647467	0.04519	0.0304932	0.0225963	0.00922077	0.00331859	0.00166292	0.00184142	0.00305377	0.00237918	0.0013151	0.000846591	0.00044117
	x 10	0.0109866	0.0297712	-0.03657	-0.00229468	0.131346	-0.05707	0	-0.0555966	-0.033668	0.360162	0.945665	1.23159	1.1511	0.647467	0.4519	0.304932	0.225963	0.0922077	0.0331859	0.0166292	0.0184142	0.0305377	0.0237918	0.013151	0.00846591	0.00441172	Sum (Area 460 to 620)
																												5.44427
EGFP Slc7a5
March 9th
	wavelength	400	410	420	430	440	450	460	470	480	490	500	510	520	530	540	550	560	570	580	590	600	610	620	630	640	650
Nanoluc substract	Raw data	0.000561268	0.000525401	-0.006	-0.00474364	0.003288	-0.00693	0	-0.0114643	-0.0198607	0.0191438	0.0247524	0.0625273	0.0443397	0.0329737	0.0166765	0.0172089	0.00556136	0.0014604	0.0041072	0.00416964	0.00207996	0.00129437	0.000784206	0.00169422	0.000611455	-0.0003862
	x 10	0.00561268	0.00525401	-0.05995	-0.0474364	0.032875	-0.06926	0	-0.114643	-0.198607	0.191438	0.247524	0.625273	0.443397	0.329737	0.166765	0.172089	0.0556136	0.014604	0.041072	0.0416964	0.0207996	0.0129437	0.00784206	0.0169422	0.00611455	-0.0038621	Sum (Area 460 to 620)
																												2.05754
March 13th (1)
	wavelength	400	410	420	430	440	450	460	470	480	490	500	510	520	530	540	550	560	570	580	590	600	610	620	630	640	650
Nanoluc substract	Raw data	0.0016427	-0.00114954	0.002485	0.0118469	0.008148	0.011729	0	0.0140553	0.0072344	0.0269372	0.0418698	0.0760752	0.0552592	0.0206849	0.0272754	0.00888357	0.0123765	0.0126284	0.00283243	0.000720173	0.00491444	0.00121126	0.00258409	0.00130385	0.00111661	7.5808e-05
	x 10	0.016427	-0.0114954	0.024849	0.118469	0.081481	0.117291	0	0.140553	0.0723445	0.269372	0.418698	0.760752	0.552592	0.206849	0.272754	0.0888357	0.123765	0.126284	0.0283243	0.00720173	0.0491444	0.0121126	0.0258409	0.0130385	0.0111661	0.00075808	Sum (Area 460 to 620)
																												3.15542
March 13th (2)
	wavelength	400	410	420	430	440	450	460	470	480	490	500	510	520	530	540	550	560	570	580	590	600	610	620	630	640	650
Nanoluc substract	Raw data	0.00107631	-0.00154904	0.007438	0.0153718	0.005121	0.009995	0	0.015728	-0.0017051	0.0288784	0.0533804	0.0953845	0.0738119	0.0379722	0.0304875	0.0240115	0.014072	0.011581	0.00455811	0.00237549	0.00406405	0.00124152	0.00275634	0.000197782	0.0013328	0.00207973
	x 10	0.0107631	-0.0154904	0.074383	0.153718	0.051212	0.099947	0	0.15728	-0.0170509	0.288784	0.533804	0.953845	0.738119	0.379722	0.304875	0.240115	0.14072	0.11581	0.0455811	0.0237549	0.0406405	0.0124152	0.0275634	0.00197782	0.013328	0.0207973	Sum (Area 460 to 620)
																												3.98598
EGFP Slc7a6
March 13th (1)
	wavelength	400	410	420	430	440	450	460	470	480	490	500	510	520	530	540	550	560	570	580	590	600	610	620	630	640	650
Nanoluc substract	Raw data	0.00242464	-0.00319431	0.003809	0.0101433	0.006566	-0.02353	0	0.0173142	-0.007339	-0.0103225	0.00048979	0.0105787	0.00129023	-0.00432775	0.00247193	-0.000420141	-0.000108194	0.00497885	0.0021493	0.0013346	0.00301711	0.000870084	0.00244051	-2.0732e-05	-1.0365e-05	8.5843e-05
	x 10	0.0242464	-0.0319431	0.038095	0.101433	0.065665	-0.23532	0	0.173142	-0.0733903	-0.103225	0.00489787	0.105787	0.0129023	-0.0432775	0.0247193	-0.00420141	-0.00108194	0.0497885	0.021493	0.013346	0.0301711	0.00870084	0.0244051	-0.00020732	-0.00010365	0.00085843	Sum (Area 460 to 620)
																												0.244178
March 13th (2)
	wavelength	400	410	420	430	440	450	460	470	480	490	500	510	520	530	540	550	560	570	580	590	600	610	620	630	640	650
Nanoluc substract	Raw data	-0.000466442	-0.00316926	0.000439	-0.00930108	0.007881	-0.00609	0	0.0126927	0.0093028	-0.0062558	0.00421436	0.0104031	-0.00138291	-0.00230652	0.0038382	0.00488228	-0.000778292	0.00338308	9.689e-06	-0.000403833	0.00383369	0.000940527	0.00233498	-0.000587327	0.000777984	-0.000252
	x 10	-0.00466442	-0.0316926	0.004394	-0.0930108	0.078808	-0.06093	0	0.126927	0.0930278	-0.0625584	0.0421436	0.104031	-0.0138292	-0.0230652	0.0383819	0.0488227	-0.00778292	0.0338308	9.689e-05	-0.00403833	0.0383369	0.00940527	0.0233498	-0.00587327	0.00777984	-0.00252	Sum (Area 460 to 620)
																												0.44708

## Sheet: Supplement 1
Figure 4 - supplement 1 C and D
WT Kv1.1
		6.19.2019.1.2					6.19.2019.2.3						6.19.2019.3.4						6.19.2019.4.2					6.19.2019.5.2						6.19.2019.6.2						6.20.2019.1.3						6.20.2019.3.2					6.20.2019.4.3
	Voltage (mV)	Tail Current Magnitude (pA)	Normalized Tail Current			Voltage (mV)	Tail Current Magnitude (pA)	Normalized Tail Current				Voltage (mV)	Tail Current Magnitude (pA)	Normalized Tail Current				Voltage (mV)	Tail Current Magnitude (pA)	Normalized Tail Current			Voltage (mV)	Tail Current Magnitude (pA)	Normalized Tail Current				Voltage (mV)	Tail Current Magnitude (pA)	Normalized Tail Current				Voltage (mV)	Tail Current Magnitude (pA)	Normalized Tail Current				Voltage (mV)	Tail Current Magnitude (pA)	Normalized Tail Current			Voltage (mV)	Tail Current Magnitude (pA)	Normalized Tail Current
	-130	41.0813	0.070438			-130	112.374	0.0888993				-130	92.4275	0.0405567				-130	108.692	0.164835			-130	72.3966	0.0097845				-130	80.4259	0.0899007				-130	121.188	0.054853				-130	111.253	0.0242838			-130	99.3166	0.0289779
	-120	45.8034	0.0794184			-120	108.136	0.083595				-120	81.0052	0.0327321				-120	95.9429	0.126577			-120	88.7889	0.0164858				-120	72.4913	0.0737705				-120	136.233	0.0766527				-120	101.507	0.017763			-120	87.1927	0.0145549
	-110	34.7207	0.058342			-110	97.2512	0.0699737				-110	74.9016	0.0285509				-110	93.3659	0.118844			-110	88.4838	0.016361				-110	65.0191	0.0585802				-110	123.4	0.0580588				-110	91.264	0.0109105			-110	96.7642	0.0259414
	-100	18.9158	0.0282852			-100	81.4499	0.0501995				-100	67.0543	0.0231752				-100	93.6372	0.119658			-100	48.4621	0				-100	54.5322	0.0372612				-100	113.146	0.0432014				-100	81.1551	0.0041473			-100	96.1538	0.0252153
	-90	13.0372	0.0171055			-90	67.8526	0.0331834				-90	57.3758	0.0165452				-90	78.9209	0.0754986			-90	138.969	0.0369994				-90	47.282	0.0225222				-90	88.8696	0.0080256				-90	82.948	0.0053468			-90	89.6064	0.0174263
	-80	8.63624	0.008736			-80	57.9513	0.0207927				-80	49.6157	0.0112292				-80	70.2403	0.0494505			-80	105.05	0.0231335				-80	42.0107	0.0118063				-80	83.3307	0				-80	74.9562	0			-80	74.958	0
	-70	10.8528	0.0129513			-70	48.8978	0.0094628				-70	42.335	0.0062418				-70	61.9667	0.0246235			-70	147.296	0.0404035				-70	36.832	0.0012784				-70	88.183	0.0070307				-70	78.4276	0.0023225			-70	92.1033	0.0203967
	-60	4.04254	0			-60	41.3362	0				-60	33.2234	0				-60	53.7608	0			-60	126.326	0.0318309				-60	36.2032	0				-60	100.512	0.024895				-60	103.376	0.0190136			-60	200.025	0.148784
	-50	18.2091	0.0269412			-50	75.5159	0.0427735				-50	71.4575	0.0261916				-50	94.9935	0.123728			-50	294.39	0.100536				-50	69.5321	0.0677546				-50	235.873	0.221026				-50	268.438	0.129445			-50	485.031	0.487838
	-40	146.03	0.270023			-40	244.753	0.254562				-40	343.108	0.212281				-40	229	0.525845			-40	936.088	0.362865				-40	228.815	0.391563				-40	452.029	0.534225				-40	794.599	0.481465			-40	716.077	0.762698
	-30	421.298	0.793512			-30	574.309	0.666978				-30	857.46	0.564628				-30	334.794	0.843305			-30	1832.65	0.729384				-30	424.22	0.788803				-30	617.648	0.774199				-30	1296.92	0.817533			-30	817.728	0.883626
	-20	502.7	0.948317			-20	756.024	0.894382				-20	1249.26	0.833025				-20	387.013	1			-20	2298.04	0.919639				-20	500.57	0.944014				-20	709.826	0.907761				-20	1514.76	0.963275			-20	848.329	0.92003
	-10	529.876	1			-10	818.754	0.972885				-10	1443.48	0.966073				-10	369.584	0.9477			-10	2471.73	0.990643				-10	528.11	1				-10	748.049	0.963144				-10	1552.22	0.988337			-10	861.59	0.935806
	0	517.316	0.976113			0	840.422	1				0	1489.17	0.997372				0	361.378	0.923077			0	2494.62	1				0	509.688	0.962551				0	773.486	1				0	1569.65	1			0	870.08	0.945906
	10	525.251	0.991203			10	831.809	0.989222				10	1493.01	1				10	357.241	0.910663			10	2493.84	0.999679				10	500.089	0.943037				10	759.539	0.979792				10	1543.42	0.982454			10	863.837	0.93848
	20	505.719	0.95406			20	832.691	0.990325				20	1470.86	0.984829				20	348.289	0.883801			20	2435.07	0.975654				20	495.613	0.933937				20	751.559	0.968229				20	1529.52	0.973151			20	869.969	0.945774
	30	505.27	0.953204			30	824.688	0.980311				30	1447.5	0.968821				30					30	2435.94	0.976011				30	477.302	0.896714				30	745.776	0.95985				30	1508.18	0.958872			30	866.612	0.94178
	40	486.381	0.917283			40	809.362	0.96113				40	1424	0.952724				40					40	2435.46	0.975815				40						40	721.362	0.924475				40	1483.32	0.942245			40	878.347	0.955741
	50	493.609	0.931028			50	807.361	0.958627				50	1387.94	0.928025				50					50	2396.31	0.95981				50						50	697.802	0.890339				50	1470.05	0.933363			50	885.033	0.963695
	60	493.866	0.931517			60	800.173	0.949631				60	1352.37	0.903655				60					60	2333.18	0.934003				60						60	675.204	0.857595				60	1425.03	0.903248			60	913.747	0.997855
	70	485	0.914656			70	776.267	0.919715				70	1310.04	0.874656				70					70	2277.86	0.911387				70						70						70	1400.87	0.88708			70	909.447	0.992739
	80	466.721	0.879895			80	777.827	0.921667				80	1290.85	0.861516				80					80	2274.55	0.910032				80						80						80	1378.53	0.872137			80	906.617	0.989373
	90	477.483	0.900361			90	748.971	0.885556				90	1257.5	0.838669				90					90	2252.53	0.901032				90						90						90	1370.52	0.866777			90	911.861	0.99561
	100	471.411	0.888814			100	734.119	0.866969				100	1214.69					100					100	2208.28					100						100						100					100	915.551	1
	110	470.191	0.886493			110	712.011					110	1184.87					110					110	2168.74					110						110						110					110	879.901	0.957589
		z->	5.89432				z->	4.3939					z->	3.95728					z->	4.7458				z->	3.93913					z->	4.71232					z->	3.30907					z->	4.34912				z->	3.33857
		V1/2->	-35.6874				V1/2->	-33.7442					V1/2->	-31.3507					V1/2->	-40.1472				V1/2->	-36.3383					V1/2->	-37.2973					V1/2->	-40.1661					V1/2->	-39.2735				V1/2->	-48.4731
WT Kv1.1 + 3-6 Hour BCH		6.19.2019.7.2					6.20.2019.11.2					6.20.2019.12.2					6.20.2019.13.2					6.20.2019.14.2					6.20.2019.15.2					6.20.2019.16.2				6.20.2019.17.2					6.21.2019.1.4					6.21.2019.2.2
	Voltage (mV)	Tail Current Magnitude (pA)	Normalized Tail Current			Voltage (mV)	Tail Current Magnitude (pA)	Normalized Tail Current			Voltage (mV)	Tail Current Magnitude (pA)	Normalized Tail Current			Voltage (mV)	Tail Current Magnitude (pA)	Normalized Tail Current			Voltage (mV)	Tail Current Magnitude (pA)	Normalized Tail Current			Voltage (mV)	Tail Current Magnitude (pA)	Normalized Tail Current			Voltage (mV)	Tail Current Magnitude (pA)	Normalized Tail Current		Voltage (mV)	Tail Current Magnitude (pA)	Normalized Tail Current			Voltage (mV)	Tail Current Magnitude (pA)	Normalized Tail Current			Voltage (mV)	Tail Current Magnitude (pA)	Normalized Tail Current
	-130	104.428	0.023074			-130	79.2422	0.0497372			-130	70.6464	0.0138364			-130	134.232	0.0982637			-130	37.2279	0.01027			-130	114.297	0.0664319			-130	105.673	0.0192117		-130	133.593	0.0596482			-130	107.588	0.0598111			-130	106.699	0.0587718
	-120	101.776	0.0213877			-120	67.2967	0.0333705			-120	59.4566	0.0079599			-120	122.199	0.0837709			-120	36.5158	0.0097149			-120	101.561	0.0531497			-120	95.8278	0.0151757		-120	121.269	0.0499508			-120	100.622	0.0485018			-120	97.1369	0.0445599
	-110	102.997	0.0221639			-110	59.7981	0.0230965			-110	52.5647	0.0043406			-110	104.79	0.0628019			-110	34.0235	0.0077719			-110	95.9658	0.0473149			-110	87.7606	0.0118686		-110	106.214	0.0381035			-110	95.3626	0.0399615			-110	104.165	0.0550058
	-100	90.3901	0.0141469			-100	58.1124	0.0207869			-100	47.0207	0.001429			-100	95.8961	0.0520899			-100	31.4804	0.0057893			-100	90.7575	0.0418833			-100	81.8163	0.0094318		-100	90.0832	0.02541			-100	84.4481	0.0222397			-100	93.0309	0.0384573
	-90	81.6978	0.0086193			-90	47.3586	0.0060529			-90	46.4104	0.0011085			-90	78.6028	0.0312609			-90	28.1743	0.0032119			-90	80.5239	0.0312109			-90	72.0507	0.0054285		-90	74.65	0.0132653			-90	78.3985	0.0124169			-90	82.7659	0.0232008
	-80	71.1324	0.0019005			-80	44.9172	0.0027079			-80	44.2996	0			-80	64.0997	0.0137926			-80	25.2497	0.0009318			-80	68.7035	0.0188835			-80	65.3368	0.0026762		-80	64.1578	0.0050088			-80	75.975	0.008482			-80	76.8658	0.0144318
	-70	68.1438	0			-70	42.9408	0			-70	44.9608	0.0003472			-70	54.5375	0.0022754			-70	24.0544	0			-70	56.6592	0.0063228			-70	58.8087	0		-70	57.7927	0			-70	70.7511	0			-70	67.1557	0
	-60	72.8583	0.002998			-60	61.106	0.0248885			-60	67.1369	0.0119933			-60	52.6483	0			-60	28.5812	0.0035291			-60	50.5964	0			-60	79.5341	0.0084962		-60	60.5247	0.0021499			-60	79.1524	0.0136411			-60	81.7301	0.0216614
	-50	123.286	0.0350661			-50	209.276	0.227899			-50	248.004	0.106978			-50	157.542	0.126339			-50	106.274	0.0640985			-50	103.127	0.0547835			-50	338.933	0.114835		-50	169.836	0.0881687			-50	136.813	0.107264			-50	172.413	0.156441
	-40	450.392	0.243081			-40	532.937	0.671352			-40	923.816	0.46189			-40	433.537	0.458762			-40	452.674	0.334153			-40	423.867	0.389277			-40	1252.18	0.489214		-40	568.483	0.401871			-40	280.209	0.340096			-40	483.563	0.61889
	-30	1121.04	0.669562			-30	728.307	0.939033			-30	1586.71	0.810017			-30	679.131	0.754568			-30	903.546	0.685654			-30	864.826	0.849144			-30	2117.02	0.84375		-30	1075.16	0.800585			-30	427.268	0.578874			-30	675.898	0.90475
	-20	1534.29	0.932357			-20	772.805	1			-20	1891.35	0.970003			-20	827.126	0.932822			-20	1165.44	0.889825			-20	1000.16	0.990282			-20	2439.9	0.97611		-20	1290.76	0.970245			-20	539.304	0.760785			-20	734.344	0.991616
	-10	1640.66	1			-10	756.674	0.977899			-10	1948.47	1			-10	876.855	0.992719			-10	1269.12	0.970657			-10	1009.48	1			-10	2498.17	1		-10	1328.57	1			-10	609.512	0.874782			-10	739.985	1
	0	1637.9	0.998247			0	764.464	0.988571			0	1943.84	0.997569			0	882.901	1			0	1306.76	1			0	991.697	0.981456			0	2495.49	0.998901		0	1323.57	0.996066			0	650.567	0.941442			0	715.478	0.963577
	10	1639.57	0.999304			10	753.361	0.973359			10	1894.96	0.9719			10	882	0.998915			10	1303.22	0.997244			10	971.495	0.960387			10	2442.58	0.977209		10	1294.1	0.972875			10	679.774	0.988866			10	711.114	0.95709
	20	1630.43	0.993495			20	725.517	0.93521			20	1874.69	0.961255			20	872.205	0.987118			20	1302.64	0.996788			20	941.669	0.929282			20	2381.65	0.952232		20	1269.17	0.953251			20	686.632	1			20	691.693	0.928226
	30	1605.56	0.977676			30	723.89	0.93298			30	1825.56	0.935452			30	853.255	0.964293			30	1289.54	0.986577			30	924.05	0.910908			30	2335.39	0.93327		30	1231.27	0.923427			30	679.343	0.988166			30	675.103	0.903568
	40	1572.2	0.956462			40	699.417	0.899451			40	1807.27	0.92585			40	840.641	0.9491			40	1265.51	0.967842			40	913.817	0.900235			40	2276.72	0.909217		40	1197.23	0.896645			40	685.555	0.998251			40	654.055	0.872286
	50	1536.63	0.933843			50	683.083	0.877071			50	1754.63	0.898204			50	819.366	0.923476			50	1247	0.953408			50	881.285	0.866309			50	2211.52	0.882489		50	1178.54	0.881939			50	674.299	0.979975			50
	60	1523.52	0.925505			60					60	1732.28	0.886464			60	809.484				60	1213.73	0.927475			60					60	2160.67	0.861645		60					60	665.431	0.965577			60
	70	1499.12	0.909992			70					70					70	813.204				70	1200.71	0.917324			70					70				70					70	659.866	0.956541			70
	80	1456.38	0.88281			80					80					80	796.812				80	1178.69	0.900155			80					80				80					80	643.871	0.93057			80
	90	1439.98	0.872383			90					90					90	800.532				90	1161.04	0.886395			90					90				90					90	628.648	0.905853			90
	100					100					100					100					100	1140.49				100					100				100					100					100
	110					110					110					110					110	1125.76				110					110				110					110					110
		z->	4.8466				z->	5.08384				z->	4.53698				z->	3.88738				z->	3.92613				z->	5.74726				z->	4.79314			z->	4.76713				z->	2.59493				z->	5.26878
		V1/2->	-33.8205				V1/2->	-43.6723				V1/2->	-38.7877				V1/2->	-38.1505				V1/2->	-34.9966				V1/2->	-37.9089				V1/2->	-39.5361			V1/2->	-37.7235				V1/2->	-32.1543				V1/2->	-42.1304
WT Kv1.1 + Overnight BCH		2020_06_15_0023.abf					2020_06_15_0029.abf					2020_06_15_0034.abf					2020_06_15_0038Leak.abf					2020_06_23_0009Leak.abf					2020_06_23_0013.abf
	Voltage (mV)	Tail Current Magnitude (pA)	Normalized Tail Current			Voltage (mV)	Tail Current Magnitude (pA)	Normalized Tail Current			Voltage (mV)	Tail Current Magnitude (pA)	Normalized Tail Current			Voltage (mV)	Tail Current Magnitude (pA)	Normalized Tail Current			Voltage (mV)	Tail Current Magnitude (pA)	Normalized Tail Current			Voltage (mV)	Tail Current Magnitude (pA)	Normalized Tail Current				voltage	average
	-130	-280.762	0			-130	-85.4492	0.0043103			-130	-537.109	0			-130	3.51564	0			-130	122.275	0.0263158			-130	115.967	0.025				-130	0.009271
	-120	-262.451	0.0049751			-120	-73.2422	0.012931			-120	-500.488	0.0057859			-120	27.9297	0.0253164			-120	128.379	0.0350877			-120	103.76	0.0125				-120	0.0160994
	-110	-219.727	0.0165837			-110	-91.5527	0			-110	-488.281	0.0077146			-110	27.9297	0.0253164			-110	116.172	0.0175439			-110	91.5527	0				-110	0.0111931
	-100	-195.312	0.0232172			-100	-79.3457	0.0086207			-100	-476.074	0.0096432			-100	46.2402	0.0443038			-100	110.068	0.0087719			-100	97.6562	0.00625				-100	0.0168011
	-90	-177.002	0.0281924			-90	-61.0352	0.0215517			-90	-488.281	0.0077146			-90	34.0332	0.0316456			-90	103.965	0			-90	103.76	0.0125				-90	0.016934
	-80	-177.002	0.0281924			-80	-73.2422	0.012931			-80	-457.764	0.0125362			-80	21.8262	0.0189873			-80	110.068	0.0087719			-80	91.5527	0				-80	0.0135698
	-70	-73.2422	0.0563847			-70	-36.6211	0.0387931			-70	-396.728	0.0221794			-70	27.9297	0.0253164			-70	103.965	0			-70	97.6562	0.00625				-70	0.0248206
	-60	244.141	0.14262			-60	67.1387	0.112069			-60	-103.76	0.0684667			-60	58.4473	0.056962			-60	146.689	0.0614035			-60	109.863	0.01875				-60	0.0767119
	-50	1043.7	0.359867			-50	280.762	0.262931			-50	1068.12	0.253616			-50	253.76	0.259494			-50	207.725	0.149123			-50	183.105	0.09375				-50	0.229797
	-40	2111.82	0.650083			-40	634.766	0.512931			-40	2984.62	0.556413			-40	565.039	0.582279			-40	433.555	0.473684			-40	463.867	0.38125				-40	0.526107
	-30	2868.65	0.855721			-30	915.527	0.711207			-30	4553.22	0.804243			-30	809.18	0.835443			-30	641.074	0.77193			-30	854.492	0.78125				-30	0.793299
	-20	3240.97	0.956882			-20	1123.05	0.857759			-20	5383.3	0.935391			-20	912.939	0.943038			-20	732.627	0.903509			-20	1007.08	0.9375				-20	0.922346
	-10	3399.66	1			-10	1232.91	0.935345			-10	5725.1	0.989393			-10	925.146	0.955696			-10	769.248	0.95614			-10	1068.12	1				-10	0.972762
	0	3399.66	1			0	1287.84	0.974138			0	5792.24	1			0	967.871	1			0	799.766	1			0	1055.91	0.9875				0	0.993606
	10	3350.83	0.986733			10	1318.36	0.99569			10	5755.61	0.994214			10	967.871	1			10	787.559	0.982456			10	1068.12	1				10	0.993182
	20	3253.17	0.960199			20	1312.26	0.991379			20	5621.34	0.972999			20	961.768	0.993671			20	781.455	0.973684			20	1055.91	0.9875				20	0.979905
	30	3186.03	0.941957			30	1324.46	1			30	5603.03	0.970106			30	961.768	0.993671			30	757.041	0.938596			30	1049.8	0.98125				30	0.97093
	40	3021.24	0.897181			40	1293.95	0.978448			40	5499.27	0.953713			40	925.146	0.955696			40	726.523	0.894737			40	1043.7	0.975				40	0.942462
	50	2905.27	0.865672			50	1306.15	0.987069			50	5346.68	0.929605			50	949.56	0.981013			50	720.42	0.885965			50	1007.08	0.9375				50	0.931137
	60	2764.89	0.827529			60	1287.84	0.974138			60	5285.64	0.919961			60	912.939	0.943038			60	702.109	0.859649			60	1019.29	0.95				60	0.912386
	70	2624.51				70	1269.53	0.961207			70					70	925.146	0.955696			70	671.592	0.815789			70	994.873	0.925				70	0.914423
	80	2520.75				80	1257.32	0.952586			80					80	937.353	0.968354			80	689.902	0.842105			80	988.769	0.91875				80	0.920449
	90	2404.78				90	1251.22	0.948276			90					90	925.146	0.955696			90	641.074	0.77193			90	982.666	0.9125				90	0.8971
	100	2301.03				100	1208.5	0.918103			100					100	894.629	0.924051			100	616.66	0.736842			100	952.148	0.88125				100	0.865062
	110	2227.78				110	1214.6	0.922414			110					110	888.525	0.917721			110	598.35	0.710526			110	952.148	0.88125				110	0.857978
		z->	3.02608				z->	2.46069				z->	3.29222				z->	3.46436				z->	3.48288				z->	4.43422				z->	3.36008	0.648813	0.264877
		V1/2->	-45.1953				V1/2->	-39.5967				V1/2->	-41.4731				V1/2->	-42.1566				V1/2->	-38.6827				V1/2->	-37.1902				V1/2->	-40.7158	2.84713	1.16234
WT Kv1.1 + Slc7a5 Overnight BCH		2020_06_15_0079Leak.abf					2020_06_15_0083.abf					2020_06_25_0023.abf					2020_06_25_0028.abf					2020_06_25_0034.abf					2020_06_25_0037.abf					2020_06_25_0038.abf
	Voltage (mV)	Tail Current Magnitude (pA)	Normalized Tail Current			Voltage (mV)	Tail Current Magnitude (pA)	Normalized Tail Current			Voltage (mV)	Tail Current Magnitude (pA)	Normalized Tail Current			Voltage (mV)	Tail Current Magnitude (pA)	Normalized Tail Current			Voltage (mV)	Tail Current Magnitude (pA)	Normalized Tail Current			Voltage (mV)	Tail Current Magnitude (pA)	Normalized Tail Current			Voltage (mV)	Tail Current Magnitude (pA)	Normalized Tail Current
	-130	61.1677	0.0222222			-130	109.863	0.0222222			-130	109.863	0.0625			-130	24.4141	0.0384615			-130	34.1657	0.0759494			-130	48.8281	0.0333333			-130	54.9316	0.0128205
	-120	73.3747	0.0444445			-120	109.863	0.0222222			-120	109.863	0.0625			-120	24.4141	0.0384615			-120	40.2693	0.0886076			-120	42.7246	0.0222222			-120	67.1387	0.0384615
	-110	55.0642	0.0111111			-110	109.863	0.0222222			-110	109.863	0.0625			-110	24.4141	0.0384615			-110	21.9587	0.0506329			-110	42.7246	0.0222222			-110	54.9316	0.0128205
	-100	48.9607	0			-100	103.76	0.0111111			-100	91.5527	0.0390625			-100	6.10352	0			-100	9.75169	0.0253165			-100	30.5176	0			-100	61.0352	0.025641
	-90	61.1677	0.0222222			-90	97.6562	0			-90	85.4492	0.03125			-90	12.207	0.0128205			-90	-2.45534	0			-90	36.6211	0.0111111			-90	54.9316	0.0128205
	-80	67.2712	0.0333333			-80	103.76	0.0111111			-80	61.0352	0			-80	18.3105	0.025641			-80	34.1657	0.0759494			-80	36.6211	0.0111111			-80	54.9316	0.0128205
	-70	61.1677	0.0222222			-70	97.6562	0			-70	61.0352	0			-70	18.3105	0.025641			-70	21.9587	0.0506329			-70	42.7246	0.0222222			-70	48.8281	0
	-60	73.3747	0.0444445			-60	109.863	0.0222222			-60	61.0352	0			-60	36.6211	0.0641026			-60	21.9587	0.0506329			-60	67.1387	0.0666667			-60	79.3457	0.0641026
	-50	103.892	0.1			-50	158.691	0.111111			-50	109.863	0.0625			-50	67.1387	0.128205			-50	64.6833	0.13924			-50	152.588	0.222222			-50	164.795	0.24359
	-40	219.859	0.311111			-40	274.658	0.322222			-40	323.486	0.335938			-40	231.934	0.474359			-40	198.961	0.417722			-40	341.797	0.566667			-40	292.969	0.512821
	-30	384.654	0.611111			-30	451.66	0.644444			-30	567.627	0.648438			-30	433.35	0.897436			-30	388.17	0.810127			-30	531.006	0.911111			-30	469.971	0.884615
	-20	488.414	0.8			-20	555.42	0.833333			-20	726.318	0.851562			-20	482.178	1			-20	467.515	0.974684			-20	579.834	1			-20	506.592	0.961538
	-10	543.345	0.9			-10	604.248	0.922222			-10	805.664	0.953125			-10	463.867	0.961538			-10	479.722	1			-10	573.73	0.988889			-10	524.902	1
	0	561.656	0.933333			0	640.869	0.988889			0	823.975	0.976562			0	469.971	0.974359			0	449.205	0.936709			0	579.834	1			0	512.695	0.974359
	10	579.966	0.966667			10	640.869	0.988889			10	842.285	1			10	463.867	0.961538			10	443.101	0.924051			10	561.523	0.966667			10	500.488	0.948718
	20	598.277	1			20	640.869	0.988889			20	842.285	1			20	476.074	0.987179			20	412.584	0.86076			20	537.109	0.922222			20	482.178	0.910257
	30	598.277	1			30	646.973	1			30	842.285	1			30	445.557	0.923077			30	400.377	0.835443			30	524.902	0.9			30	463.867	0.871795
	40	592.173	0.988889			40	640.869	0.988889			40	823.975	0.976562			40	457.764	0.948718			40	363.756	0.759494			40	524.902	0.9			40	445.557	0.833333
	50	579.966	0.966667			50	610.352	0.933333			50	830.078	0.984375			50	415.039	0.858974			50	363.756	0.759494			50	512.695	0.877778			50	421.143	0.782051
	60	586.07	0.977778			60	604.248	0.922222			60	823.975	0.976562			60	415.039	0.858974			60					60	506.592	0.866667			60	433.35	0.807692
	70	598.277	1			70					70					70	402.832	0.833333			70					70	488.281	0.833333			70	421.143	0.782051
	80	567.759	0.944444			80					80					80	390.625	0.807692			80					80	469.971	0.8			80	415.039	0.769231
	90	579.966	0.966667			90					90					90	402.832	0.833333			90					90	469.971	0.8			90	408.936	0.75641
	100	586.07	0.977778			100					100					100					100					100	445.557	0.755556			100	415.039	0.769231
	110	579.966	0.966667			110					110					110					110					110	439.453	0.744444			110	396.728
		z->	2.79258				z->	3.15758				z->	3.5252				z->	5.05262				z->	4.18699				z->	4.27865				z->	3.82793
		V1/2->	-32.8796				V1/2->	-34.0089				V1/2->	-34.1809				V1/2->	-39.853				V1/2->	-38.434				V1/2->	-42.1859				V1/2->	-41.404
WT Kv1.1 + 3-6 Hour Rapa		6.25.2019.2.2					6.25.2019.3.2					6.25.2019.4.3					6.25.2019.5.5					6.25.2019.6.2					6.25.2019.7.2					6.25.2019.8.2					6.25.2019.9.2					6.25.2019.10.2					6.26.2019.5.2
	Voltage (mV)	Tail Current Magnitude (pA)	Normalized Tail Current			Voltage (mV)	Tail Current Magnitude (pA)	Normalized Tail Current			Voltage (mV)	Tail Current Magnitude (pA)	Normalized Tail Current			Voltage (mV)	Tail Current Magnitude (pA)	Normalized Tail Current			Voltage (mV)	Tail Current Magnitude (pA)	Normalized Tail Current			Voltage (mV)	Tail Current Magnitude (pA)	Normalized Tail Current			Voltage (mV)	Tail Current Magnitude (pA)	Normalized Tail Current			Voltage (mV)	Tail Current Magnitude (pA)	Normalized Tail Current			Voltage (mV)	Tail Current Magnitude (pA)	Normalized Tail Current			Voltage (mV)	Tail Current Magnitude (pA)	Normalized Tail Current
	-130	134.471	0.10823			-130	114.524	0.0276195			-130	206.402	0.0852522			-130	159.468	0.0481608			-130	205.335	0.0424058			-130	115.847	0.0942384			-130	92.8181	0.135098			-130	174.45	0.104728			-130	126.914	0.103179			-130	144.212	0.0177167
	-120	123.781	0.0901268			-120	106.925	0.0233155			-120	183.819	0.0624751			-120	131.226	0.0347101			-120	189.124	0.0347916			-120	104.468	0.0696667			-120	78.4514	0.109705			-120	151.919	0.0775958			-120	119.397	0.09074			-120	90.0084	0
	-110	108.984	0.0650668			-110	98.0253	0.0182755			-110	172.041	0.0505956			-110	98.9879	0.0193568			-110	177.308	0.0292414			-110	94.3829	0.047888			-110	61.8311	0.0803286			-110	133.608	0.0555466			-110	109.117	0.0737295			-110	114.164	0.0078954
	-100	101.264	0.0519919			-100	86.212	0.0115852			-100	161.137	0.039598			-100	112.277	0.0256857			-100	159.974	0.0210997			-100	90.9824	0.0405448			-100	53.873	0.0662628			-100	127.06	0.0476612			-100	94.5973	0.0497023			-100	127.451	0.0122383
	-90	90.7234	0.0341398			-90	80.8173	0.00853			-90	144.212	0.0225276			-90	72.3267	0.0066593			-90	139.881	0.0116622			-90	77.8308	0.0121446			-90	58.3567	0.0741878			-90	117.201	0.0357895			-90	79.981	0.0255156			-90	132.968	0.0140414
	-80	78.5494	0.0135218			-80	74.635	0.0050288			-80	121.876	0			-80	65.1412	0.0032371			-80	125.159	0.0047474			-80	82.9316	0.0231595			-80	28.473	0.0213684			-80	101.177	0.0164933			-80	71.95	0.0122262			-80	139.916	0.0163126
	-70	70.5653	0			-70	65.7554	0			-70	190.038	0.0687475			-70	58.3441	0			-70	115.052	0			-70	72.2068	0			-70	30.8909	0.0256421			-70	87.4801	0			-70	64.5616	0			-70	139.517	0.0161821
	-60	74.2769	0.006286			-60	93.7725	0.015867			-60	350.412	0.2305			-60	107.45	0.0233867			-60	133.826	0.0088183			-60	81.6237	0.0203351			-60	16.3833	0			-60	101.684	0.0171037			-60	79.724	0.0250904			-60	339.126	0.0814247
	-50	131.666	0.103481			-50	293.81	0.129155			-50	617.812	0.5002			-50	338.912	0.133621			-50	392.859	0.130486			-50	122.212	0.107983			-50	26.9471	0.0186714			-50	184.64	0.116998			-50	174.81	0.182437			-50	984.15	0.292253
	-40	334.666	0.447282			-40	937.554	0.493728			-40	831.979	0.716209			-40	878.934	0.390809			-40	971.522	0.402282			-40	308.82	0.510952			-40	186.789	0.301191			-40	502.498	0.499757			-40	338.609	0.453487			-40	1961.63	0.611744
	-30	557.791	0.825166			-30	1518.16	0.822542			-30	964.096	0.849461			-30	1437.35	0.656757			-30	1445.89	0.62509			-30	478.236	0.876797			-30	460.696	0.78532			-30	808.264	0.867954			-30	466.815	0.665639			-30	2716.61	0.858512
	-20	637.021	0.959351			-20	1766.1	0.962958			-20	1043.11	0.929156			-20	1821.51	0.839715			-20	1757.34	0.771378			-20	525.8	0.979508			-20	560.019	0.960873			-20	905.724	0.985313			-20	541.15	0.788646			-20	2999.11	0.950847
	-10	656.008	0.991507			-10	1831.5	1			-10	1081.46	0.967839			-10	2027.64	0.937886			-10	1982.53	0.877151			-10	535.289	1			-10	582.156	1			-10	917.92	1			-10	589.464	0.868595			-10	3116.91	0.98935
	0	661.023	1			0	1824.1	0.995807			0	1113.35	1			0	2117.67	0.980762			0	2142.13	0.952113			0	518.737	0.964257			0	578.235	0.993071			0	913.12	0.99422			0	630.1	0.935839			0	3149.49	1
	10	640.353	0.964994			10	1809.47	0.987523			10	1086.84	0.973263			10	2158.06	1			10	2191	0.97507			10	518.926	0.964665			10	572.578	0.983071			10	880.089	0.954444			10	632.67	0.940091			10	3102.63	0.984685
	20	619.585	0.929821			20	1774.33	0.967619			20	1072.64	0.958938			20	2128.18	0.98577			20	2222.33	0.989783			20	492.695	0.908021			20	560.089	0.960997			20	858.509	0.928458			20	647.64	0.964863			20	3057.96	0.970083
	30	619.997	0.930519			30	1725.87	0.940178			30	1060.8	0.946992			30	2107.1	0.975728			30	2244.08	1			30	486.912	0.895531			30	525.252	0.899423			30	829.657	0.893716			30	646.901	0.96364			30	3033.08	0.96195
	40	596.49	0.890708			40	1677.36	0.912704			40	1072.54	0.958838			40	2014.91	0.931822			40	2236.85	0.996606			40	463.457	0.844882			40	513.914	0.879383			40	814.109	0.874992			40	651.977	0.972039			40	3026.15	0.959686
	50	575.425	0.855032			50	1657.26	0.901319			50	1036.35	0.922335			50	1948.08	0.899992			50	2236.41	0.996399			50					50	507.857	0.868678			50					50	665.308	0.9941			50	2991.06	0.948216
	60					60	1607.07	0.872896			60	1001.64	0.887329			60	1881.55	0.868308			60	2219.67	0.988533			60					60					60					60	655.671	0.978152			60	2986.78	0.946819
	70					70					70	977.111	0.862588			70					70	2234	0.995264			70					70					70					70	664.634	0.992983			70	2937.32	0.930652
	80					80					80					80					80	2179.41	0.969623			80					80					80					80	639.577	0.95152			80	2947.13	0.93386
	90					90					90					90					90	2159.12	0.960094			90					90					90					90	645.52	0.961355			90	2931.66	0.928803
	100					100					100					100					100	2088.76				100					100					100					100	668.874	1			100	2890.07	0.915207
	110					110					110					110					110	1994.08				110					110					110					110	630.165				110	2817.62	0.891528
		z->	4.68263				z->	4.40913				z->	2.64092				z->	3.00968				z->	2.55683				z->	5.17579				z->	5.62593				z->	5.016				z->	2.38248				z->	3.4903
		V1/2->	-38.6614				V1/2->	-39.4982				V1/2->	-48.7333				V1/2->	-35.3274				V1/2->	-33.9356				V1/2->	-40.0679				V1/2->	-35.9789				V1/2->	-39.9034				V1/2->	-35.7236				V1/2->	-43.291
WT Kv1.1 + Overnight Rapa		2020_06_12_0031.abf					2020_06_12_0037.abf					2020_06_12_0046.abf					2020_06_12_0051.abf					2020_06_22_0003.abf					2020_06_22_0010.abf					2020_06_22_0015.abf
	Voltage (mV)	Tail Current Magnitude (pA)	Normalized Tail Current			Voltage (mV)	Tail Current Magnitude (pA)	Normalized Tail Current			Voltage (mV)	Tail Current Magnitude (pA)	Normalized Tail Current			Voltage (mV)	Tail Current Magnitude (pA)	Normalized Tail Current			Voltage (mV)	Tail Current Magnitude (pA)	Normalized Tail Current			Voltage (mV)	Tail Current Magnitude (pA)	Normalized Tail Current			Voltage (mV)	Tail Current Magnitude (pA)	Normalized Tail Current			voltage	average
	-130	30.5176	0.0058939			-130	164.795	0.0244755			-130	134.277	0.012939			-130	238.037	0.0343053			-130	85.4492	0.0217391			-130	36.6211	0.003252			-130	115.967	0.0466667			-130	0.0213245
	-120	12.207	0			-120	140.381	0.0104895			-120	128.174	0.0110906			-120	195.312	0.0222985			-120	97.6562	0.0326087			-120	30.5176	0.001626			-120	97.6562	0.0266667			-120	0.0149686
	-110	36.6211	0.0078585			-110	146.484	0.013986			-110	122.07	0.0092421			-110	183.105	0.0188679			-110	79.3457	0.0163043			-110	30.5176	0.001626			-110	91.5527	0.02			-110	0.012555
	-100	61.0352	0.0157171			-100	140.381	0.0104895			-100	97.6562	0.0018484			-100	146.484	0.0085763			-100	79.3457	0.0163043			-100	24.4141	0			-100	85.4492	0.0133333			-100	0.009467
	-90	54.9316	0.0137525			-90	122.07	0			-90	91.5527	0			-90	152.588	0.0102916			-90	79.3457	0.0163043			-90	36.6211	0.003252			-90	79.3457	0.0066667			-90	0.007181
	-80	79.3457	0.021611			-80	152.588	0.0174825			-80	115.967	0.0073937			-80	115.967	0			-80	79.3457	0.0163043			-80	24.4141	0			-80	79.3457	0.0066667			-80	0.0099226
	-70	103.76	0.0294695			-70	140.381	0.0104895			-70	115.967	0.0073937			-70	122.07	0.0017153			-70	61.0352	0			-70	54.9316	0.0081301			-70	73.2422	0			-70	0.0081712
	-60	134.277	0.0392927			-60	146.484	0.013986			-60	128.174	0.0110906			-60	146.484	0.0085763			-60	79.3457	0.0163043			-60	122.07	0.0260163			-60	85.4492	0.0133333			-60	0.0183714
	-50	402.832	0.125737			-50	207.52	0.048951			-50	262.451	0.051756			-50	219.727	0.0291595			-50	158.691	0.0869565			-50	421.143	0.105691			-50	134.277	0.0666667			-50	0.0735596
	-40	1190.19	0.379175			-40	524.902	0.230769			-40	1000.98	0.275416			-40	970.459	0.240137			-40	518.799	0.407609			-40	1214.6	0.317073			-40	396.728	0.353333			-40	0.314787
	-30	2026.37	0.64833			-30	1177.98	0.604895			-30	2117.92	0.613678			-30	2130.13	0.566038			-30	921.631	0.766304			-30	2136.23	0.562602			-30	787.353	0.78			-30	0.648835
	-20	2600.1	0.833006			-20	1611.33	0.853147			-20	2911.38	0.853974			-20	3027.34	0.818182			-20	1098.63	0.923913			-20	2777.1	0.733333			-20	927.734	0.933333			-20	0.849841
	-10	2911.38	0.933202			-10	1782.23	0.951049			-10	3247.07	0.955638			-10	3460.69	0.939966			-10	1159.67	0.978261			-10	3302	0.873171			-10	964.355	0.973333			-10	0.943517
	0	3045.65	0.976424			0	1824.95	0.975525			0	3350.83	0.987061			0	3656.01	0.994854			0	1184.08	1			0	3582.76	0.947967			0	982.666	0.993333			0	0.982166
	10	3094.48	0.992142			10	1867.68	1			10	3393.55	1			10	3674.32	1			10	1159.67	0.978261			10	3704.83	0.980488			10	988.769	1			10	0.992984
	20	3118.9	1			20	1837.16	0.982518			20	3387.45	0.998152			20	3656.01	0.994854			20	1177.98	0.994565			20	3778.08	1			20	958.252	0.966667			20	0.990965
	30	3070.07	0.984283			30	1837.16	0.982518			30	3320.31	0.977819			30	3619.38	0.984563			30	1159.67	0.978261			30	3759.77	0.995122			30	970.459	0.98			30	0.983224
	40	3027.34	0.97053			40	1831.05	0.979021			40	3247.07	0.955638			40	3564.45	0.969125			40	1147.46	0.967391			40	3765.87	0.996748			40	946.045	0.953333			40	0.970255
	50	2978.52	0.954813			50	1770.02	0.944056			50	3161.62	0.92976			50	3472.9	0.943396			50	1104.74	0.929348			50	3698.73	0.978862			50	927.734	0.933333			50	0.944796
	60	2917.48	0.935167			60	1788.33	0.954546			60	3149.41	0.926063			60	3417.97	0.927959			60	1104.74	0.929348			60	3662.11	0.969106			60	915.527	0.92			60	0.937455
	70	2874.76	0.921415			70	1733.4	0.923077			70	3070.07	0.902033			70	3302	0.895369			70	1049.8	0.880435			70	3552.25	0.939837			70	903.32	0.906667			70	0.909833
	80	2819.82	0.903733			80	1727.29	0.91958			80	2984.62	0.876155			80	3234.86				80	1025.39	0.858696			80	3485.11	0.921951			80	885.01				80	0.896023
	90	2777.1	0.88998			90	1708.98	0.909091			90	2850.34	0.83549			90	3112.79				90	1031.49	0.86413			90	3411.86	0.902439			90	854.492				90	0.880226
	100	2752.69	0.882122			100	1721.19	0.916084			100	2813.72				100	3070.07				100	1000.98				100	3356.93				100	866.699				100	0.899103
	110	2764.89	0.886051			110	1702.88				110	2758.79				110	2984.62				110	982.666				110	3302				110	848.389				110
		z->	2.92296				z->	3.88063				z->	3.70142				z->	3.6254				z->	4.18715				z->	2.53556				z->	4.69777			z->	3.65013	0.731818	0.276601
		V1/2->	-34.9883				V1/2->	-32.32				V1/2->	-32.9604				V1/2->	-31.4578				V1/2->	-37.2933				V1/2->	-31.3255				V1/2->	-36.6443			V1/2->	-33.8556	2.45587	0.928232
WT Kv1.1 + Slc7a5 Overnight Rapa		2020_06_12_0003.abf					2020_06_12_0007.abf					2020_06_12_0014.abf					2020_06_22_0023.abf					2020_06_25_0003.abf					2020_06_25_0015.abf
	Voltage (mV)	Tail Current Magnitude (pA)	Normalized Tail Current			Voltage (mV)	Tail Current Magnitude (pA)	Normalized Tail Current			Voltage (mV)	Tail Current Magnitude (pA)	Normalized Tail Current			Voltage (mV)	Tail Current Magnitude (pA)	Normalized Tail Current			Voltage (mV)	Tail Current Magnitude (pA)	Normalized Tail Current			Voltage (mV)	Tail Current Magnitude (pA)	Normalized Tail Current			voltage	average
	-130	35.5859	0.0689655			-130	48.8281	0.0363636			-130	-109.863	0.047619			-130	146.484	0.018315			-130	61.0352	0.040404			-130	78.3105	0.0057803			-130	0.0362413
	-120	35.5859	0.0689655			-120	36.6211	0			-120	-109.863	0.047619			-120	146.484	0.018315			-120	48.8281	0.020202			-120	78.3105	0.0057803			-120	0.0268137
	-110	35.5859	0.0689655			-110	42.7246	0.0181818			-110	-122.07	0.015873			-110	122.07	0.003663			-110	48.8281	0.020202			-110	84.4141	0.0115607			-110	0.0230743
	-100	29.4824	0.0344828			-100	42.7246	0.0181818			-100	-128.174	0			-100	122.07	0.003663			-100	36.6211	0			-100	72.207	0			-100	0.0093879
	-90	29.4824	0.0344828			-90	42.7246	0.0181818			-90	-115.967	0.031746			-90	115.967	0			-90	42.7246	0.010101			-90	90.5176	0.017341			-90	0.0186421
	-80	23.3789	0			-80	48.8281	0.0363636			-80	-109.863	0.047619			-80	134.277	0.010989			-80	54.9316	0.030303			-80	78.3105	0.0057803			-80	0.0218425
	-70	29.4824	0.0344828			-70	42.7246	0.0181818			-70	-91.5527	0.0952381			-70	122.07	0.003663			-70	48.8281	0.020202			-70	84.4141	0.0115607			-70	0.0305547
	-60	29.4824	0.0344828			-60	54.9316	0.0545455			-60	-85.4492	0.111111			-60	146.484	0.018315			-60	61.0352	0.040404			-60	114.932	0.0404624			-60	0.0498868
	-50	53.8965	0.172414			-50	79.3457	0.127273			-50	-30.5176	0.253968			-50	335.693	0.131868			-50	128.174	0.151515			-50	182.07	0.104046			-50	0.156847
	-40	96.6211	0.413793			-40	164.795	0.381818			-40	79.3457	0.539682			-40	823.975	0.424908			-40	317.383	0.464647			-40	426.211	0.33526			-40	0.426685
	-30	151.553	0.724138			-30	262.451	0.672727			-30	170.898	0.777778			-30	1348.88	0.739927			-30	512.695	0.787879			-30	774.111	0.66474			-30	0.727865
	-20	163.76	0.793103			-20	323.486	0.854545			-20	219.727	0.904762			-20	1647.95	0.919414			-20	610.351	0.949495			-20	1018.25	0.895954			-20	0.886212
	-10	188.174	0.931034			-10	335.693	0.890909			-10	244.141	0.968254			-10	1733.4	0.970696			-10	634.766	0.989899			-10	1103.7	0.976879			-10	0.954612
	0	194.277	0.965517			0	360.107	0.963636			0	244.141	0.968254			0	1782.23	1			0	640.869	1			0	1128.12	1			0	0.982901
	10	194.277	0.965517			10	360.107	0.963636			10	250.244	0.984127			10	1757.81	0.985348			10	628.662	0.979798			10	1122.01	0.99422			10	0.978774
	20	188.174	0.931034			20	360.107	0.963636			20	256.348	1			20	1715.09	0.959707			20	622.559	0.969697			20	1109.8	0.982659			20	0.967789
	30	200.381	1			30	366.211	0.981818			30	225.83	0.920635			30	1702.88	0.952381			30	610.351	0.949495			30	1091.49	0.965318			30	0.961608
	40	188.174	0.931034			40	372.314	1			40	250.244	0.984127			40	1660.16	0.92674			40	616.455	0.959596			40	1079.29	0.953757			40	0.959209
	50	194.277	0.965517			50	360.107	0.963636			50	231.934	0.936508			50	1629.64	0.908425			50	573.73	0.888889			50	1079.29	0.953757			50	0.936122
	60	188.174	0.931034			60	354.004	0.945454			60	238.037	0.952381			60	1605.22				60	579.834	0.89899			60	1054.87				60	0.931965
	70	175.967	0.862069			70	354.004	0.945454			70	207.52	0.873016			70	1538.09				70	567.627	0.878788			70	1030.46				70	0.889832
	80	175.967	0.862069			80	354.004	0.945454			80	213.623	0.888889			80	1507.57				80	549.316	0.848485			80	1060.98				80	0.886224
	90	182.07	0.896552			90	347.9	0.927273			90	207.52	0.873016			90	1477.05				90	555.42				90	1030.46				90	0.898947
	100	157.656	0.758621			100	360.107	0.963636			100	219.727	0.904762			100	1464.84				100	531.006				100	1024.36				100	0.875673
	110	163.76	0.793103			110	347.9	0.927273			110					110	1446.53				110					110	1006.04				110	0.860188
		z->	2.72604				z->	2.87958				z->	2.69804				z->	3.68525				z->	3.85261				z->	3.58978			z->	3.23855	0.526051
		V1/2->	-36.4876				V1/2->	-35.4113				V1/2->	-41.2014				V1/2->	-37.4737				V1/2->	-38.915				V1/2->	-35.0342			V1/2->	-37.4205	2.32952
[truncated: 30 more columns]
