# Supplementary material for: Control of Slc7a5 sensitivity by the voltage-sensing domain of Kv1 channels
Source: eLife. 2020 Nov 9;9:e54916. doi: 10.7554/eLife.54916 (PMC7690953; doi:10.7554/eLife.54916)
Supplement: Figure 5—source data 1. [file elife-54916-fig5-data1.xlsx]

## Sheet: Main Figure
	WT Kv1.1		% reduction			1.1 + Slc7a5		% reduction			1.1 + Slc7a5 (F252A)		% reduction
	Peak current	Inactivated current				Peak current	Inactivated current				Peak current	Inactivated current
2020_03_11_0016.abf	2009.79	1568.71	21.9467		2020_03_20_0002.abf	1605.94	1329.75	17.1977		2020_03_19_0081Leak.abf	637.601	114.838	81.989
2020_03_11_0018.abf	1956.48	1328.74	32.0855		2020_03_20_0007Leak.abf	3840.32	2572.47	33.0142		2020_03_19_0077Leak.abf	4272	3039.94	28.8403
2020_03_11_0019.abf	1687.01	1167.4	30.8008		2020_03_20_0015Leak.abf	197.695	135.947	31.2342		2020_03_19_0072Leak.abf	6248.52	3829.5	38.7136
2020_03_11_0020.abf	1618.88	1192.93	26.3113		2020_03_20_0017.abf	1393.79	1025.19	26.446		2020_03_19_0068.abf	6793.92	4539.08	33.189
2020_03_13_0034Leak.abf	2166.97	1454.49	32.8792		2020_03_20_0022Leak.abf	141.216	49.7998	64.7351		2020_03_19_0037.abf	374.696	140.597	62.477
2020_03_13_0038.abf	7975.8	5048.08	36.7075		2020_03_20_0025Leak.abf	157.114	57.3722	63.4836		2020_03_19_0007.abf	686.362	583.276	15.0191
2020_03_13_0046.abf	2982.89	1810.51	39.3036		2020_03_20_0030Leak.abf	616.716	352.983	42.7641		2020_03_19_0073.abf	3049.97	1870.82	38.661
2020_03_13_0049.abf	2513.73	1426.94	43.2342		2020_03_21_0000Leak.abf	299.159	172.111	42.4682		2020_03_19_0039Leak.abf	370.866	139.574	62.3653
2020_03_11_0021.abf	1477.41	1126.91	23.7236		2020_03_12_0028Leak.abf	2046.74	1691.82	17.3407		2020_03_19_0069.abf	6043.09	4096.17	32.2173
2020_03_11_0024Leak.abf	1464.55	750.069	48.7849		2020_03_20_0025Leak.abf	537.643	381.545	29.0337		2020_03_19_0061.abf	810.085	707.364	12.6803
2020_03_11_0028Leak.abf	849.707	378.349	55.473		2020_03_20_0023Leak.abf	684.424	462.823	32.3777		2020_03_19_0075Leak.abf	1543.81	832.29	46.0885
2020_03_13_0033Leak.abf	2338.76	1624.2	30.5533		2020_03_20_0024Leak.abf	201.868	93.6219	53.6223		2020_03_19_0082Leak.abf	404.014	68.3207	83.0895
2020_03_13_0040Leak.abf	6432.03	2848.1	55.7201		2020_03_20_0021Leak.abf	230.596	77.2961	66.4799		2020_03_19_0067Leak.abf	7469.53	5229.54	29.9884
2020_03_13_0047Leak.abf	2604.65	1505.97	42.1816		2020_03_20_0003.abf	1261.04	1048.94	16.8193		2020_03_19_0065.abf	1474.23	950.394	35.5328
2020_03_11_0017.abf	1867.98	1419.68	23.9993		2020_03_20_0031Leak.abf	482.709	276.169	42.7876		2020_03_19_0040.abf	253.086	94.1677	62.7921
2020_03_13_0032Leak.abf	2779.09	1965.13	29.2888		2020_03_20_0026Leak.abf	279.075	78.5238	71.8629		2020_03_19_0041Leak.abf	373.649	226.605	39.3535
2020_03_13_0036Leak.abf	2408.71	1585.6	34.1723		2020_03_20_0008Leak.abf	3655.33	2546.83	30.3256		2020_03_19_0038Leak.abf	396.215	158.544	59.9854
2020_03_13_0039Leak.abf	5079.67	3049.54	39.9658		2020_03_12_0029Leak.abf	1351.01	1133.04	16.1337		2020_03_19_0070Leak.abf	4394.89	3173.46	27.792
2020_03_13_0042Leak.abf	6636.82	2120.32	68.0522		2020_03_12_0024Leak.abf	709.163	435.42	38.6008		2020_03_19_0074.abf	2634.12	1653.9	37.2125
2020_03_13_0045.abf	3393.64	2185.22	35.6085		2020_03_12_0019Leak.abf	929.155	824.632	11.2492		2020_03_19_0078.abf	3560.03	2533.8	28.8264
2020_03_13_0048.abf	2733.27	1624.25	40.5748		2020_03_12_0014Leak.abf	417.192	352.561	15.4918		2020_03_19_0080Leak.abf	999.46	110.849	88.9091
2020_03_11_0022.abf	1809.34	1306.33	27.8011		2020_03_12_0010Leak1000.abf	532.573	323.345	39.2863
2020_03_11_0025.abf	1146.05	620.538	45.8542		2020_03_20_0029Leak.abf	1020.06	545.29	46.5431
2020_03_11_0029Leak.abf	814.14	310.244	61.893		2020_03_20_0027Leak.abf	365.302	130.073	64.3931
2020_03_13_0041Leak.abf	9102.54	3396.7	62.6841		2020_03_20_0018Leak.abf	1057.4	761.629	27.9714
	2480.03	1420.95	42.7044		2020_03_20_0013.abf	553.781	445.927	19.4759
					2020_03_20_0009Leak.abf	1967.04	1675.28	14.8325
					2020_03_20_0006.abf	4678.24	3088.34	33.9849

## Sheet: Supplement 1
Y379T Kv1.1	10	40	70			Y397T Kv1.1 + Slc7a5	10	40	70			Y397T Kv1.1 + Slc7a5 (F252A)	10	40	70
2019_09_10_0000.abf	1088.7	822.375	706.982			2019_09_11_0000.abf	99.3177	92.0554	71.8308			2019_09_10_0021Leak.abf	572.824	467.187	346.415
2019_09_10_0002.abf	1038.41	871.385	826.656			2019_09_11_0002leak.abf	84.1923	53.5997	85.6785			2019_09_10_0022Leak.abf	736.276	627.68	583.999
2019_09_10_0003.abf	1348.84	1469.44	1105.24			2019_09_11_0005.abf	458.235	354.705	245.764			2019_09_10_0023Leak.abf	751.831	596.282	501.692
2019_09_10_0006.abf	1002.52	760.569	722.815			2019_09_11_0006.abf	1122.13	722.468	437.488			2019_09_10_0024Leak.abf	725.504	565.878	486.221
2019_09_10_0007.abf	1151.07	1110.85	794.297			2019_09_11_0007.abf	433.252	320.094	157.529			2019_09_10_0025Leak.abf	523.747	478.764	361.644
2019_09_10_0009.abf	1441.99	1095.96				2019_09_11_0011.abf	297.942	329.311	192.434			2019_09_10_0026Leak.abf	483.957	368.678	284.595
2019_09_10_0011.abf	926.08	802.478	725.892			7.31.2019.1.3	424.873	566.499	380.969			2019_09_10_0028Leak.abf	641.264	605.528	554.98
2019_09_10_0013.abf	660.447	733.362	599.261			7.31.2019.2.3	1044.22	618.083	633.837			2019_09_10_0029Leak.abf	662.918	589.245	587.169
7.25.2019.5.3	1001.78	845.044	755.932			8.2.2019.1.3	257.918	148.221	105.047			2019_09_10_0030.abf	683.995	698.232	623.375
7.25.2019.6.3	1292.81	854.851	764.173			8.2.2019.2.3	147.515	113.23	98.8734			8.9.2019.1.3	599.434	471.023	254.509
7.25.2019.7.3	1056.14	882.19	723.443			8.2.2019.3.3	96.5349	82.5696	78.4101			8.9.2019.2.3	718.062	730.839	719.725
7.25.2019.10.3	1524.89	1325.15	924.745			8.13.2019.4.4	712.895	619.411	601.22			8.9.2019.4.3	603.264	458.697	290.95
7.25.2019.11.3	1289.65	894.9	749.247			8.13.2019.5.2	647.049	549.604	417.513			8.9.2019.5.3	831.055	688.46	604.645
7.25.2019.12.3	1042.62	881.779	671.872			8.13.2019.6.2	393.449	395.728	372.053			8.13.2019.15.4	1011.52	849.374	773.698
7.25.2019.13.3	1235.31	1103.53	955.731			8.13.2019.7.3	596.407	564.215	317.717			8.14.2019.1.4	638.938	526.931	475.819
7.25.2019.14.3	1044.56	899.416	847.616			8.13.2019.8.2	723.699	439.177	454.145			8.14.2019.2.2	676.562	597.614	534.791
7.25.2019.15.3	1165.51	983.98	789.184			8.13.2019.9.2	1227.61	999.604	965.312			8.14.2019.5.2	879.657	690.028	628.506
						8.13.2019.10.4	444.132	480.008	302.28			8.14.2019.6.2	639.766	543.896	572.173
						8.13.2019.11.4	1097.67	737.563	641.209
						8.13.2019.12.2	630.88	553.148	443.457
						8.13.2019.13.2	575.447	837.972	584.85
average	1135.96	961.015	791.443			average	548.35	456.06	361.315			average	687.81	586.352	510.272
STDEV	201.551	194.386	118.168			STDEV	339.191	256.544	230.209			STDEV	96.0922	99.74	121.97
SEM	48.8834	47.1455	29.5421			SEM	74.0176	55.9824	50.2357			SEM	22.6491	23.5089	28.7486
