# Supplementary material for: Control of Slc7a5 sensitivity by the voltage-sensing domain of Kv1 channels
Source: eLife. 2020 Nov 9;9:e54916. doi: 10.7554/eLife.54916 (PMC7690953; doi:10.7554/eLife.54916)
Supplement: Figure 6—source data 1. [file elife-54916-fig6-data1.xlsx]

## Sheet: Main Figure
Figure 6 B
WT Kv1.1						WT + Slc7a5						WT + Slc7a5 (F252A)
30s	initial	post -80mV for 30s	post -120mV for 30s			30s	initial	post -80mV for 30s	post -120mV for 30s			30s	initial	post -80mV for 30s	post -120mV for 30s
2020_06_10_0088.abf	22.0889	49.1186	79.6362	2020_06_10_0089Leak.abf		2020_06_10_0051Leak.abf	6.39359	8.90682	60.4718	2020_06_10_0052Leak.abf		2020_06_10_0000.abf	66.4092	104.439	191.845	2020_06_10_0001.abf
2020_06_10_0098.abf	64.2665	84.0129	116.685	2020_06_10_0099.abf		2020_06_10_0053Leak.abf	11.2806	12.9082	119.33	2020_06_10_0054Leak.abf		2020_06_10_0003leak.abf	5.05371	17.5998	64.855	2020_06_10_0004leak.abf
2020_06_10_0107.abf	173.771	163.718	173.412	2020_06_10_0108.abf		2020_06_10_0057Leak.abf	13.0381	22.8037	205.233	2020_06_10_0058Leak.abf		2020_06_10_0008.abf	17.0898	31.4941	84.3168	2020_06_10_0009.abf
2020_06_10_0111.abf	52.0252	64.8133	101.725	2020_06_10_0113.abf		2020_06_10_0064.abf	4.65332	3.72613	42.3492	2020_06_10_0065Leak.abf		2020_06_10_0014.abf	25.3531	41.3161	251.862	2020_06_10_0015.abf
2020_06_10_0116.abf	300.428	345.527	403.687	2020_06_10_0117.abf		2020_06_10_0069Leak.abf	5.84375	6.25065	40.2771	2020_06_10_0070Leak.abf		2020_06_10_0019Leak.abf	20.6348	118.291	358.873	2020_06_10_0020.abf
2020_06_10_0121.abf	692.984	745.568	813.646	2020_06_10_0122.abf		2020_06_10_0072.abf	4.06901	6.10351	41.1775	2020_06_10_0073Leak.abf		2020_06_10_0027.abf	31.7891	64.85	120.22	2020_06_10_0028.abf
2020_06_10_0126.abf	128.576	146.331	234.046	2020_06_10_0127.abf		2020_06_10_0078Leak.abf	5.04396	6.70854	53.645	2020_06_10_0079Leak.abf		2020_06_10_0036.abf	6.654	22.2519	80.23	2020_06_10_0037.abf
2020_06_10_0129.abf	209.045	256.857	382.996	2020_06_10_0130.abf		2020_06_10_0084.abf	7.66947	10.9007	74.9682	2020_06_10_0085.abf		2020_06_10_0042.abf	12.6786	42.4782	136.004	2020_06_10_0043.abf
2020_06_16_0020.abf	103.149	114.136	148.315	2020_06_16_0021.abf		2020_06_17_0016.abf	8.71931	9.59124	41.3764	2020_06_17_0017Leak.abf		2020_06_10_0047Leak.abf	10.4059	23.1753	73.6389	2020_06_10_0048.abf
2020_06_16_0023.abf	47.0632	56.623	104.422	2020_06_16_0024.abf		2020_06_17_0021.abf	6.6474	7.85601	34.4455	2020_06_17_0022.abf		2020_06_17_0064Leak.abf	7.90815	16.3592	42.2481	2020_06_17_0065.abf
2020_06_16_0026Leak.abf	123.026	139.117	192.679	2020_06_16_0027.abf		2020_06_17_0027.abf	6.61214	6.61214	26.9572	2020_06_17_0028.abf		2020_06_17_0067.abf	7.1294	8.3501	27.6572	2020_06_17_0068.abf
												2020_06_17_0072Leak.abf	11.1976	17.5785	103.305	2020_06_17_0073.abf
												2020_06_17_0075Leak.abf	9.52311	11.8642	78.1694	2020_06_17_0076Leak.abf
												2020_06_17_0078Leak.abf	9.80013	11.0208	43.9017	2020_06_17_0079Leak.abf
												2020_06_17_0081Leak.abf	16.506	25.4069	56.8254	2020_06_17_0082Leak.abf
Figure 6 C												2020_06_17_0086.abf	8.80522	14.378	125.181	2020_06_17_0087Leak.abf
												2020_06_17_0092.abf	15.2588	38.4992	119.019	2020_06_17_0093.abf
WT Kv1.1				WT Kv1.1 + Slc7a5				WT Kv1.1 + Slc7a5(F252A)
	sweep 1	217.056			sweep 1	178.586			sweep 1	90.16
2020_06_10_0093.abf	sweep 2	220.108		2020_06_10_0055Leak.abf	sweep 2	169.634		2020_06_10_0005.abf	sweep 2	86.4301
	sweep 1	171.257			sweep 1	98.2498			sweep 1	124.512
2020_06_10_0100.abf	sweep 2	152.588		2020_06_10_0062Leak.abf	sweep 2	99.9773		2020_06_10_0010.abf	sweep 2	115.967
	sweep 1	252.757			sweep 1	64.6973			sweep 1	334.285
2020_06_10_0109.abf	sweep 2	229.779		2020_06_10_0074.abf	sweep 2	67.5456		2020_06_10_0017.abf	sweep 2	314.566
	sweep 1	135.118			sweep 1	81.9664
2020_06_10_0114.abf	sweep 2	131.049		2020_06_10_0080Leak.abf	sweep 2	80.3018			sweep 1	180.629
								2020_06_10_0029.abf	sweep 2	154.435
	sweep 1	738.525			sweep 1	68.8825
2020_06_10_0119.abf	sweep 2	756.497		2020_06_17_0019.abf	sweep 2	74.986			sweep 1	71.3138
								2020_06_10_0050.abf	sweep 2	69.9053
	sweep 1	1212.25			sweep 1	56.805
2020_06_10_0123.abf	sweep 2	1059.19		2020_06_17_0024.abf	sweep 2	53.7834			sweep 1	99.6907
								2020_06_17_0085.abf	sweep 2	92.3157
	sweep 1	567.118			sweep 1	45.0134
2020_06_10_0131.abf	sweep 2	517.782		2020_06_17_0031.abf	sweep 2	45.3949			sweep 1	315.762
								2020_06_17_0091Leak.abf	sweep 2	323.458
2020_03_11_0016.abf	sweep 1	172.933		2020_03_20_0002.abf	sweep 1	130.953			sweep 1	174.654
	sweep 2	181.853			sweep 2	123.261		2020_06_17_0095.abf	sweep 2	161.743
2020_03_11_0021.abf	sweep 1	136.781		2020_03_20_0007Leak.abf	sweep 1	300.289		2020_03_19_0081Leak.abf	sweep 1	51.7992
	sweep 2	121.288			sweep 2	279.077			sweep 2	50.3728
2020_03_11_0024Leak.abf	sweep 1	160.169		2020_03_20_0015Leak.abf	sweep 1	22.8748		2020_03_19_0072Leak.abf	sweep 1	133.135
	sweep 2	165.265			sweep 2	25.7032			sweep 2	139.658
2020_03_11_0028Leak.abf	sweep 1	78.8095		2020_03_20_0017.abf	sweep 1	118.325		2020_03_19_0068.abf	sweep 1	91.1148
	sweep 2	88.4007			sweep 2	122.209			sweep 2	94.0286
2020_03_13_0033Leak.abf	sweep 1	199.089		2020_03_20_0022Leak.abf	sweep 1	22.6556		2020_03_19_0037.abf	sweep 1	33.6963
	sweep 2	190.821			sweep 2	21.679			sweep 2	40.5883
2020_03_13_0040Leak.abf	sweep 1	588.053		2020_03_20_0025Leak.abf	sweep 1	32.0355
	sweep 2	525.553			sweep 2	23.4906
2020_03_13_0047Leak.abf	sweep 1	261.63		2020_03_20_0030Leak.abf	sweep 1	114.229
	sweep 2	254.622			sweep 2	106.476
				2020_03_21_0000Leak.abf	sweep 1	52.4704
					sweep 2	48.2576
Figure 6 D
WT Kv1.1 disinhibition					WT Kv1.1 + Slc7a5 disinhibition					WT Kv1.1 + Slc7a5 (F252A) disinhibition					Kv1.1 Y379T disinhibition					Kv1.1 Y379T + Slc7a5 disinhibition					Kv1.1 Y379T + Slc7a5(F252A) disinhibition
	30s at -80 mV	30s disin. at -120	% Peak current at -80 mV			30s at -80 mV	30s disin. at -120	% Peak current at -80 mV			30s at -80 mV	30s disin. at -120	% Peak current at -80 mV			30s at -80 mV	30s disin. at -120	% Peak current at -80 mV			30s at -80 mV	30s disin. at -120	% Peak current at -80 mV			30s at -80 mV	30s disin. at -120	% Peak current at -80 mV
2020_06_10_0088.abf	49.1186	79.6362	61.6787		2020_06_10_0051Leak.abf	8.90682	60.4718	14.7289		2020_06_10_0000.abf	104.439	191.845	54.4389		2020_06_08_0041.abf	321.651	383.436	83.8867		2020_06_08_0004Leak.abf	2.86658	14.595	19.6409		2020_06_08_0083Leak	52.6681	153.608	34.2874
2020_06_10_0098.abf	84.0129	116.685	72		2020_06_10_0053Leak.abf	12.9082	119.33	10.8172		2020_06_10_0003leak.abf	17.5998	64.855	27.1372		2020_06_08_0049.abf	72.0213	112.711	63.8989		2020_06_08_0009.abf	1.98412	15.8656	12.5058		2020_06_08_0088Leak.abf	89.0847	158.707	56.1314
2020_06_10_0107.abf	163.718	173.412	94.4098		2020_06_10_0057Leak.abf	22.8037	205.233	11.1111		2020_06_10_0008.abf	31.4941	84.3168	37.3521		2020_06_08_0051.abf	192.769	236.002	81.681		2020_06_08_0014Leak.abf	11.6515	28.0713	41.5068		2020_06_08_0096Leak.abf	65.657	163.882	40.0636
2020_06_10_0111.abf	64.8133	101.725	63.7141		2020_06_10_0064.abf	3.72613	42.3492	8.79859		2020_06_10_0014.abf	41.3161	251.862	16.4042		2020_06_08_0057.abf	160.871	170.184	94.5278		2020_06_08_0018Leak.abf	27.1572	113.408	23.9465		2020_06_08_0102Leak.abf	16.4862	51.8097	31.8206
2020_06_10_0116.abf	345.527	403.687	85.5928		2020_06_10_0069Leak.abf	6.25065	40.2771	15.5191		2020_06_10_0019Leak.abf	118.291	358.873	32.9618		2020_06_08_0060.abf	112.305	172.73	65.0176		2020_06_08_0023Leak.abf	3.30218	12.9985	25.4042		2020_06_08_0109Leak.abf	71.7922	202.368	35.476
2020_06_10_0121.abf	745.568	813.646	91.6329		2020_06_10_0072.abf	6.10351	41.1775	14.8225		2020_06_10_0027.abf	64.85	120.22	53.943		2020_06_08_0065.abf	341.034	429.863	79.3355		2020_06_08_0030Leak.abf	9.653	41.0549	23.5124		2020_06_08_0115Leak.abf	116.097	226.38	51.284
2020_06_10_0126.abf	146.331	234.046	91.6329		2020_06_10_0078Leak.abf	6.70854	53.645	12.5054		2020_06_10_0036.abf	22.2519	80.23	27.7351		2020_06_08_0067.abf	16.5303	31.7891	52		2020_06_08_0037Leak.abf	3.95638	17.1619	23.0533		2020_06_08_0121Leak.abf	13.8877	38.9074	35.6943
2020_06_10_0129.abf	256.857	382.996	67.0651		2020_06_10_0084.abf	10.9007	74.9682	14.5404		2020_06_10_0042.abf	42.4782	136.004	31.2331		2020_06_08_0073.abf	116.288	159.013	73.1312		2020_06_17_0000.abf	6.79604	26.838	25.3225		2020_06_17_0033.abf	14.748	55.8523	26.4054
2020_06_16_0020.abf	114.136	148.315	76.9551		2020_06_17_0016.abf	9.59124	41.3764	23.1805		2020_06_10_0047Leak.abf	23.1753	73.6389	31.4716		2020_06_08_0081.abf	99.8231	137.853	72.4127		2020_06_17_0004Leak.abf	25.8008	73.6664	35.0238		2020_06_17_0035.abf	43.1812	120.982	35.6923
2020_06_16_0023.abf	56.623	104.422	54.2254		2020_06_17_0021.abf	7.85601	34.4455	22.807		2020_06_17_0064Leak.abf	16.3592	42.2481	38.7217		2020_06_16_0000Leak.abf	53.212	65.7133	80.9761		2020_06_17_0009Leak.abf	2.81527	8.73359	32.235		2020_06_17_0048.abf	26.9334	89.2776	30.1681
2020_06_16_0026Leak.abf	139.117	192.679	72.2015		2020_06_17_0027.abf	6.61214	26.9572	24.5283		2020_06_17_0067.abf	8.3501	27.6572	30.1914		2020_06_16_0004Leak.abf	91.4218	66.4218	137.638							2020_06_17_0055.abf	29.3438	122.07	24.0384
										2020_06_17_0072Leak.abf	17.5785	103.305	17.0162		2020_06_16_0006.abf	273.496	267.101	102.394							2020_06_17_0060Leak.abf	17.5241	53.8675	32.5319
										2020_06_17_0075Leak.abf	11.8642	78.1694	15.1775		2020_06_16_0009Leak.abf	109.464	98.5466	111.079
										2020_06_17_0078Leak.abf	11.0208	43.9017	25.1034		2020_06_16_0014.abf	203.451	255.534	79.6179
										2020_06_17_0081Leak.abf	25.4069	56.8254	44.7105
										2020_06_17_0086.abf	14.378	125.181	11.4857
										2020_06_17_0092.abf	38.4992	119.019	32.3473
WT Kv1.1 recovery from inact at -80 mV					WT Kv1.1 + Slc7a5 recovery from inact at -80 mV	% Peak current at -80 mV				WT Kv1.1 + Slc7a5(F252A) recovery from inact at -80 mV	% Peak current at -80 mV				Kv1.1 Y379T recovery from inact at -80 mV	% Peak current at -80 mV				Kv1.1 Y379T + Slc7a5 recovery from inact at -80 mV	% Peak current at -80 mV				Kv1.1 Y379T + Slc7a5 (F252A) recovery from inact at -80 mV	% Peak current at -80 mV
	% Peak current at -80 mV				2020_06_10_0055Leak.abf	94.9874				2020_06_10_0005.abf	95.863				2020_06_08_0043.abf	95.6085				2020_06_08_0006Leak.abf	46.4784				2020_06_08_0099Leak.abf	97.363
2020_06_10_0093.abf	101.406				2020_06_10_0062Leak.abf	101.758				2020_06_10_0010.abf	93.1373				2020_06_08_0053.abf	92.0114				2020_06_08_0011Leak.abf	46.5756				2020_06_08_0106Leak.abf	96.2347
2020_06_10_0100.abf	89.0985				2020_06_10_0074.abf	104.403				2020_06_10_0017.abf	94.1011				2020_06_08_0062.abf	93.1871				2020_06_08_0016Leak.abf	93.0827				2020_06_08_0112Leak.abf	99.3588
2020_06_10_0109.abf	90.9091				2020_06_10_0080Leak.abf	97.9692				2020_06_10_0029.abf	85.4983				2020_06_08_0069.abf	87.7005				2020_06_08_0021.abf	95.0026				2020_06_08_0117Leak.abf	109.528
2020_06_10_0114.abf	96.9886				2020_06_17_0019.abf	108.861				2020_06_10_0050.abf	98.0249				2020_06_08_0076.abf	93.3635				2020_06_08_0033Leak.abf	100					92.019
2020_06_10_0119.abf	102.433				2020_06_17_0024.abf	94.6809				2020_06_17_0085.abf	92.602				2020_06_08_0080Leak.abf	95.5103				2020_06_08_0039Leak.abf	66.2606				2020_06_17_0039.abf	128.921
2020_06_10_0123.abf	87.3741				2020_06_17_0031.abf	100.847				2020_06_17_0091Leak.abf	102.437				2020_06_16_0002Leak.abf	100.761				2020_06_17_0015.abf	56.3216				2020_06_17_0063.abf	92.7907
2020_06_10_0131.abf	91.3004				2020_03_20_0002.abf	94.1266				2020_06_17_0095.abf	92.6075				2020_06_16_0012Leak.abf	93.1178				2020_03_12_0034Leak.abf	84.262				2020_03_13_0053.abf	83.0782
2020_03_11_0016.abf	105.158				2020_03_20_0007Leak.abf	92.9361				2020_03_19_0081Leak.abf	97.2464				2020_06_16_0019.abf	96.9697				2020_03_12_0053.abf	83.7884				2020_03_15_0006.abf	92.1008
2020_03_11_0021.abf	88.6728				2020_03_20_0015Leak.abf	112.365				2020_03_19_0072Leak.abf	106.203				2020_03_11_0012.abf	87.8375				2020_03_16_0003Leak.abf	79.1442				2020_03_15_0011Leak.abf	91.9327
2020_03_11_0024Leak.abf	103.182				2020_03_20_0017.abf	103.283				2020_03_19_0068.abf	103.238				2020_03_13_0011Leak.abf	82.305				2020_03_18_0032.abf	85.8995				2020_03_15_0015Leak.abf	108.675
2020_03_11_0028Leak.abf	112.17				2020_03_20_0022Leak.abf	95.6895				2020_03_19_0037.abf	120.453				2020_03_13_0019Leak.abf	82.4515				2020_03_18_0043.abf	88.9952				2020_03_15_0021Leak.abf	81.6571
2020_03_13_0033Leak.abf	95.8471				2020_03_20_0025Leak.abf	73.3267									2020_03_13_0024Leak.abf	89.701				2020_03_21_0002Leak.abf	88.2345				2020_03_19_0091.abf	85.3278
2020_03_13_0038.abf	89.3717				2020_03_20_0030Leak.abf	93.2126									2020_03_13_0029Leak2.abf	85.0993				2020_03_21_0003Leak.abf	85.6928				2020_03_19_0096.abf	80.019
2020_03_13_0047Leak.abf	97.3215				2020_03_21_0000Leak.abf	91.971									2020_03_19_0085.abf	92.0528				2020_03_21_0014.abf	98.6326				2020_03_19_0103Leak.abf	109.217
															2020_03_11_0009Leak.abf	91.2535									2020_03_19_0109lEAK.abf	93.8531
																									2020_03_19_0115Leak.abf	88.1872

## Sheet: supplement 1
Figure 6 - supplement 1 B
Kv1.1 (Y379T)						Kv1.1 (Y379T) + Slc7a5						Kv1.1 (Y379T) + Slc7a5 ( F252A)
30s	initial	post -80mV for 30s	post -120mV for 30s				initial	post -80mV for 30s	post -120mV for 30s				initial	post -80mV for 30s	post -120mV for 30s
2020_06_08_0041.abf	263.612	321.651	383.436	2020_06_08_0042.abf		2020_06_08_0004Leak.abf	2.69703	2.86658	14.595	2020_06_08_0005.abf		2020_06_08_0083Leak	23.0224	52.6681	153.608	2020_06_08_0084Leak
2020_06_08_0049.abf	37.028	72.0213	112.711	2020_06_08_0050.abf		2020_06_08_0009.abf	3.39262	1.98412	15.8656	2020_06_08_0010Leak.abf		2020_06_08_0088Leak.abf	51.6499	89.0847	158.707	2020_06_08_0089Leak.abf
2020_06_08_0051.abf	153.605	192.769	236.002	2020_06_08_0052.abf		2020_06_08_0014Leak.abf	11.9906	11.6515	28.0713	2020_06_08_0015Leak.abf		2020_06_08_0096Leak.abf	42.7255	65.657	163.882	2020_06_08_0097Leak.abf
2020_06_08_0057.abf	164.795	160.871	170.184	2020_06_08_0058Leak.abf		2020_06_08_0018Leak.abf	31.4297	27.1572	113.408	2020_06_08_0019Leak.abf		2020_06_08_0102Leak.abf	5.6355	16.4862	51.8097	2020_06_08_0103.abf
2020_06_08_0060.abf	66.5285	112.305	172.73	2020_06_08_0061.abf		2020_06_08_0023Leak.abf	3.88346	3.30218	12.9985	2020_06_08_0024Leak.abf		2020_06_08_0109Leak.abf	45.0043	71.7922	202.368	2020_06_08_0110.abf
2020_06_08_0065.abf	389.353	341.034	429.863	2020_06_08_0066.abf		2020_06_08_0030Leak.abf	10.0599	9.653	41.0549	2020_06_08_0031Leak.abf		2020_06_08_0115Leak.abf	52.7362	116.097	226.38	2020_06_08_0116Leak.abf
2020_06_08_0067.abf	7.62937	16.5303	31.7891	2020_06_08_0068.abf		2020_06_08_0037Leak.abf	5.17708	3.95638	17.1619	2020_06_08_0038Leak.abf		2020_06_08_0121Leak.abf	8.74795	13.8877	38.9074	2020_06_08_0122Leak.abf
2020_06_08_0073.abf	81.9158	116.288	159.013	2020_06_08_0074.abf		2020_06_17_0000.abf	4.41529	6.79604	26.838	2020_06_17_0001.abf		2020_06_17_0033.abf	7.60321	14.748	55.8523	2020_06_17_0034Leak.abf
2020_06_08_0081.abf	132.689	99.8231	137.853	2020_06_08_0079Leak.abf		2020_06_17_0004Leak.abf	18.3894	25.8008	73.6664	2020_06_17_0005.abf		2020_06_17_0035.abf	18.6086	43.1812	120.982	2020_06_17_0036.abf
2020_06_16_0000Leak.abf	42.917	53.212	65.7133	2020_06_16_0001Leak.abf		2020_06_17_0009Leak.abf	2.58921	2.81527	8.73359	2020_06_17_0010Leak.abf		2020_06_17_0048.abf	13.6492	26.9334	89.2776	2020_06_17_0049.abf
2020_06_16_0004Leak.abf	79.6654	91.4218	66.4218	2020_06_16_0005Leak.abf								2020_06_17_0055.abf	15.4935	29.3438	122.07	2020_06_17_0056.abf
2020_06_16_0006.abf	274.949	273.496	267.101	2020_06_16_0007.abf								2020_06_17_0060Leak.abf	7.86025	17.5241	53.8675	2020_06_17_0061Leak.abf
2020_06_16_0009Leak.abf	99.0011	109.464	98.5466	2020_06_16_0010.abf
2020_06_16_0014.abf	159.098	203.451	255.534	2020_06_16_0015.abf
Figure 6 - supplement 1 C
Kv1.1 (Y379T)				Kv1.1 (Y379T) + Slc7a5				Kv1.1 (Y379T) + Slc7a5 (F252A)
	sweep 1	596.871			sweep 1	41.1805			sweep 1	176.202
2020_06_08_0043.abf	sweep 2	570.66		2020_06_08_0006Leak.abf	sweep 2	19.1401		2020_06_08_0090Leak.abf	sweep 2	368.71
	sweep 1	334.263			sweep 1	117.102
2020_06_08_0053.abf	sweep 2	307.56		2020_06_08_0011Leak.abf	sweep 2	54.541			sweep 1	287.569
								2020_06_08_0099Leak.abf	sweep 2	279.986
	sweep 1	264.282			sweep 1	70.144
2020_06_08_0062.abf	sweep 2	246.277		2020_06_08_0016Leak.abf	sweep 2	65.2919
									sweep 1	72.0432
	sweep 1	47.5566			sweep 1	134.348		2020_06_08_0106Leak.abf	sweep 2	69.3305
2020_06_08_0069.abf	sweep 2	41.7073		2020_06_08_0021.abf	sweep 2	127.634
									sweep 1	317.31
	sweep 1	212.981						2020_06_08_0112Leak.abf	sweep 2	315.276
2020_06_08_0076.abf	sweep 2	198.846			sweep 1	25.998
				2020_06_08_0033Leak.abf	sweep 2	25.998			sweep 1	332.483
	sweep 1	209.146						2020_06_08_0117Leak.abf	sweep 2	364.163
2020_06_08_0080Leak.abf	sweep 2	199.756			sweep 1	27.7383
				2020_06_08_0039Leak.abf	sweep 2	18.3796			sweep 1	68.4253
	sweep 1	96.6608							sweep 2	62.9643
2020_06_16_0002Leak.abf	sweep 2	97.3962			sweep 1	13.9738
				2020_06_17_0015.abf	sweep 2	7.87025			sweep 1	164.131
	sweep 1	164.701						2020_06_17_0039.abf	sweep 2	211.599
2020_06_16_0012Leak.abf	sweep 2	153.366		2020_03_12_0034Leak.abf	sweep 1	43.9302
					sweep 2	37.0165			sweep 1	72.9031
	sweep 1	241.699						2020_06_17_0063.abf	sweep 2	67.6473
2020_06_16_0019.abf	sweep 2	234.375		2020_03_12_0053.abf	sweep 1	24.8379
					sweep 2	20.8113		2020_03_13_0053.abf	sweep 1	98.3251
2020_03_11_0012.abf	sweep 1	187.506							sweep 2	81.6868
	sweep 2	164.7		2020_03_16_0003Leak.abf	sweep 1	56.4234
					sweep 2	44.6559		2020_03_15_0006.abf	sweep 1	106.524
2020_03_13_0011Leak.abf	sweep 1	232.292							sweep 2	98.109
	sweep 2	191.188		2020_03_18_0032.abf	sweep 1	65.4934
					sweep 2	56.2585		2020_03_15_0011Leak.abf	sweep 1	51.3617
2020_03_13_0019Leak.abf	sweep 1	70.9755							sweep 2	47.2182
	sweep 2	58.5203		2020_03_18_0043.abf	sweep 1	17.4744
					sweep 2	15.5514		2020_03_15_0015Leak.abf	sweep 1	69.8949
2020_03_13_0024Leak.abf	sweep 1	135.459							sweep 2	75.9583
	sweep 2	121.508		2020_03_21_0002Leak.abf	sweep 1	59.0319
					sweep 2	52.0866		2020_03_15_0021Leak.abf	sweep 1	80.0604
2020_03_13_0029Leak2.abf	sweep 1	140.597							sweep 2	65.3749
	sweep 2	119.647		2020_03_21_0014.abf	sweep 1	29.477
					sweep 2	29.0739		2020_03_19_0091.abf	sweep 1	108.226
2020_03_19_0085.abf	sweep 1	376.002							sweep 2	92.3467
	sweep 2	346.12
								2020_03_19_0096.abf	sweep 1	242.068
2020_03_11_0009Leak.abf	sweep 1	240.58							sweep 2	193.7
	sweep 2	219.537
								2020_03_19_0103Leak.abf	sweep 1	124.619
									sweep 2	136.104
								2020_03_19_0109lEAK.abf	sweep 1	385.125
									sweep 2	361.451
								2020_03_19_0115Leak.abf	sweep 1	45.2985
									sweep 2	39.9474
