# Supplementary material for: Control of Slc7a5 sensitivity by the voltage-sensing domain of Kv1 channels
Source: eLife. 2020 Nov 9;9:e54916. doi: 10.7554/eLife.54916 (PMC7690953; doi:10.7554/eLife.54916)
Supplement: Figure 7—source data 1. [file elife-54916-fig7-data1.xlsx]

## Sheet: Main Figure GVs
Chimera_N1				Chimera_N1				Chimera_N1																							Chimera_N1+Slc7a5 mcherry (1:1)				Chimera_N1+Slc7a5 mcherry (1:1)				Chimera_N1+Slc7a5 mcherry (1:1)				Chimera_N1+Slc7a5 mcherry (1:1)				Chimera_N1+Slc7a5 mcherry (1:1)
2018_06_20_0014				2018_06_20_0032				2018_06_20_0026															AVERAGES								2018_06_27_051				2018_07_04_0016				2018_07_04_0030				2018_07_04_0035				2018_07_04_0040
Voltage	Current 1-2 (tail current)	Normalized tail current		Voltage	Current 1-2 (tail current)	Normalized tail current		Voltage	Current 1-2 (tail current)	Normalized tail current													Mean voltage	Mean normalized tail current	st. error						Voltage	Current 1-2 (tail current)	Normalized tail current		Voltage	Current 1-2 (tail current)	Normalized tail current		Voltage	Current 1-2 (tail current)	Normalized tail current		Voltage	Current 1-2 (tail current)	Normalized tail current		Voltage	Current 1-2 (tail current)	Normalized tail current
-100	0.015767	0.194885		-100	0.017995	0.045721		-100	0.007405	0.016505													-100	0.085704	0.045102						-100	0.019008	0		-100	0.047679	0.000799		-100	0.298031	0		-100	0.158352	0		-100	0.404395	0
-90	0.01475	0.186067		-90	0.011455	0.031346		-90	0.006139	0.013273													-90	0.076895	0.044772						-90	0.024573	0.016858		-90	0.047069	0		-90	0.331749	0.039524		-90	0.197093	0.040891		-90	0.439346	0.040571
-80	0.012919	0.170194		-80	0.012224	0.033036		-80	0.004856	0.009995													-80	0.071075	0.040828						-80	0.037193	0.055086		-80	0.079938	0.043055		-80	0.460935	0.190954		-80	0.277507	0.12577		-80	0.518104	0.131993
-70	0.011902	0.161376		-70	0.009386	0.026798		-70	0.004452	0.008963													-70	0.065712	0.03928						-70	0.060916	0.126948		-70	0.110195	0.082689		-70	0.597252	0.350743		-70	0.385217	0.23946		-70	0.677152	0.316615
-60	0.008647	0.133157		-60	0.006374	0.020177		-60	0.001984	0.002659													-60	0.051998	0.033389						-60	0.10891	0.272329		-60	0.212465	0.216651		-60	0.766334	0.548939		-60	0.682492	0.553239		-60	0.928099	0.607911
-50	0.000916	0.066138		-50	0.005146	0.017476		-50	0.000942	0													-50	0.027871	0.016156						-50	0.190023	0.51804		-50	0.378454	0.434077		-50	0.893005	0.697419		-50	0.930278	0.814782		-50	1.11221	0.821621
-40	0.001119	0.067901		-40	-0.0028	0		-40	0.00131	0.00094													-40	0.022947	0.018354						-40	0.270069	0.760515		-40	0.595012	0.717744		-40	1.02511	0.85227		-40	1.03166	0.921797		-40	1.21955	0.946221
-30	-0.00671	0		-30	0.015125	0.039413		-30	0.005655	0.012035													-30	0.017149	0.009522						-30	0.318296	0.906604		-30	0.720367	0.881946		-30	1.10405	0.944806		-30	1.07807	0.970777		-30	1.26588	1
-20	-0.00214	0.039683		-20	0.125012	0.280963		-20	0.055174	0.138505													-20	0.15305	0.057179						-20	0.338527	0.967889		-20	0.795396	0.980224		-20	1.15114	1		-20	1.10501	0.999213		-20	1.25901	0.992033
-10	0.045776	0.455026		-10	0.254232	0.565009		-10	0.159715	0.405497													-10	0.475178	0.038487						-10	0.349128	1		-10	0.809497	0.998695		-10	1.13799	0.984592		-10	1.10172	0.995741		-10	1.23795	0.967583
0	0.087585	0.81746		0	0.34867	0.772599		0	0.243853	0.620384													0	0.736814	0.048694						0	0.343114	0.981783		0	0.803914	0.991382		0	1.07831	0.914635		0	1.10045	0.994399		0	1.20629	0.930835
10	0.108643	1		10	0.410387	0.908262		10	0.318774	0.811728													10	0.906663	0.044381						10	0.333851	0.953724		10	0.810493	1		10	1.0174	0.84323		10	1.10575	1		10	1.15447	0.87068
20	0.10732	0.988536		20	0.438955	0.971059		20	0.352792	0.898608													20	0.952734	0.022478						20	0.319472	0.910166		20	0.79185	0.97558		20	0.972648	0.790776		20	1.09063	0.984037		20	1.11954	0.830136
30	0.104472	0.963845		30	0.452121	1		30	0.384791	0.980331													30	0.981392	0.008533						30	0.302732	0.859458		30	0.773719	0.951831		30	0.907519	0.714433		30	1.08163	0.974535		30	1.10177	0.80951
40	0.088603	0.826279		40	0.452113	0.999983		40	0.392492	1													40	0.942087	0.047279						40	0.267736	0.753446		40	0.748515	0.918816		40	0.799264	0.587538		40	1.08348	0.976485		40	1.07758	0.781424
	V1/2	-9.44277			V1/2	-11.532			V1/2	-5.02983												V1/2	-8.66822	1.56487								V1/2	-52.8923			V1/2	-48.6522			V1/2	-66.6032			V1/2	-61.8294			V1/2	-65.7986
	k	4.10857			k	8.08624			k	9.02427												k	7.07303	1.23027								k	8.1153			k	8.50003			k	8.80616			k	8.08145			k	6.99306
Chimera S1				Chimera S1				Chimera S1				Chimera S1				Chimera S1															ChimeraS1+Slc7a5_mcharry (1:1)				ChimeraS1+Slc7a5_mcharry (1:1)				ChimeraS1+Slc7a5_mcharry (1:1)				ChimeraS1+Slc7a5_mcharry (1:1)				ChimeraS1+Slc7a5_mcharry (1:1)
2018_06_06_0000				2018_06_06_0005				2018_06_06_0007				2018_06_06_0009				2018_06_06_0014							AVERAGES								2018_06_27_0026				2018_06_27_035				2018_07_25_0003				2018_07_05_0008				2018_07_05_0013
Voltage	Current 1-2 (tail current)	Normalized tail current		Voltage	Current 1-2 (tail current)	Normalized tail current		Voltage	Current 1-2 (tail current)	Normalized tail current		Voltage	Current 1-2 (tail current)	Normalized tail current		Voltage	Current 1-2 (tail current)	Normalized tail current					Mean voltage	Mean normalized tail current	st. error						Voltage	Current 1-2 (tail current)	Normalized tail current		Voltage	Current 1-2 (tail current)	Normalized tail current		Voltage	Current 1-2 (tail current)	Normalized tail current		Voltage	Current 1-2 (tail current)	Normalized tail current		Voltage	Current 1-2 (tail current)	Normalized tail current
-100	0.005247	0.015018		-100	-0.03685	0.027233		-100	0.054734	0.036914		-100	0.049385	0.036425		-100	0.020863	0					-100	0.023118	0.006275						-100	0.05717	0		-100	0.036108	0		-100	0.019067	0.044157		-100	0.026602	0		-100	0.028409	0.11337
-90	0.005423	0.015649		-90	-0.03428	0.030897		-90	0.036872	0.018883		-90	0.039242	0.023729		-90	0.026884	0.014607					-90	0.020753	0.002676						-90	0.060832	0.0316		-90	0.038016	0.00802		-90	0.014571	0		-90	0.040936	0.052905		-90	0.005017	0.017554
-80	0.004167	0.011148		-80	-0.04915	0.009684		-80	0.030356	0.012305		-80	0.032564	0.01537		-80	0.029725	0.021497					-80	0.014001	0.001873						-80	0.0619	0.040816		-80	0.049904	0.057973		-80	0.021866	0.07166		-80	0.059236	0.120453		-80	0.014968	0.058315
-70	0.003204	0.007698		-70	-0.04694	0.012835		-70	0.022368	0.00424		-70	0.027609	0.009168		-70	0.022905	0.004954					-70	0.007779	0.001386						-70	0.071577	0.124314		-70	0.053159	0.071652		-70	0.015695	0.011039		-70	0.097245	0.260746		-70	0.012421	0.04788
-60	0.001056	0		-60	-0.0441	0.016883		-60	0.020052	0.001903		-60	0.021057	0.000966		-60	0.030629	0.023689					-60	0.008688	0.004351						-60	0.097758	0.35023		-60	0.088404	0.219761		-60	0.027621	0.128188		-60	0.127153	0.371134		-60	0.000731	0
-50	0.002101	0.003744		-50	-0.05593	0		-50	0.018167	0		-50	0.020285	0		-50	0.02807	0.017482					-50	0.004245	0.00303						-50	0.131684	0.642967		-50	0.158033	0.512356		-50	0.030508	0.156547		-50	0.177527	0.557065		-50	0.021563	0.085326
-40	0.015752	0.052667		-40	-0.03805	0.025517		-40	0.060102	0.042332		-40	0.056422	0.045234		-40	0.048704	0.067538					-40	0.046658	0.006131						-40	0.150744	0.807439		-40	0.216588	0.758417		-40	0.061917	0.465074		-40	0.227822	0.742705		-40	0.03986	0.160272
-30	0.080907	0.286177		-30	0.058796	0.163733		-30	0.298875	0.283366		-30	0.217806	0.247247		-30	0.159342	0.335924					-30	0.26329	0.02559						-30	0.145709	0.763989		-30	0.247008	0.886252		-30	0.068021	0.525029		-30	0.255435	0.844628		-30	0.112903	0.459456
-20	0.166415	0.59263		-20	0.271216	0.466887		-20	0.618358	0.605875		-20	0.466739	0.558851		-20	0.277246	0.621936					-20	0.569236	0.024698						-20	0.17306	1		-20	0.260107	0.941294		-20	0.087891	0.720213		-20	0.273765	0.912285		-20	0.185336	0.756141
-10	0.243108	0.867491		-10	0.464123	0.742193		-10	0.836002	0.82558		-10	0.645788	0.782976		-10	0.372883	0.853934					-10	0.814435	0.020696						-10	0.170327	0.97641		-10	0.274077	1		-10	0.104903	0.887324		-10	0.282074	0.942953		-10	0.20094	0.820054
0	0.267815	0.956041		0	0.583087	0.911972		0	0.952723	0.943406		0	0.751504	0.915307		0	0.419857	0.967883					0	0.938922	0.009871						0	0.161972	0.904323		0	0.268167	0.975166		0	0.108885	0.926437		0	0.29753	1		0	0.223098	0.910815
10	0.279858	0.999201		10	0.640371	0.993723		10	1.00047	0.99161		10	0.802882	0.979619		10	0.433097	1					10	0.992831	0.003279						10	0.155475	0.848255		10	0.256096	0.924439		10	0.115589	0.992292		10	0.285401	0.955234		10	0.244872	1
20	0.280081	1		20	0.644769	1		20	1.00879	1		20	0.810673	0.989371		20	0.432228	0.997893					20	0.997453	0.001844						20	0.145836	0.765087		20	0.250002	0.898832		20	0.115725	0.993624		20	0.280469	0.93703		20	0.232838	0.950707
30	0.272675	0.973456		30	0.641825	0.995798		30	0.989147	0.980175		30	0.81595	0.995978		30	0.427839	0.987244					30	0.98653	0.003934						30	0.136236	0.682247		30	0.245904	0.881611		30	0.110997	0.947183		30	0.242559	0.7971		30	0.238861	0.97538
40	0.267451	0.954737		40	0.581418	0.909589		40	0.94802	0.938659		40	0.819164	1		40	0.430679	0.994135					40	0.959424	0.015216						40	0.109813	0.454246		40	0.231885	0.822701		40	0.116374	1		40	0.243504	0.800589		40	0.231338	0.944565
	V1/2	-23.2126			V1/2	-18.8936			V1/2	-23.1772			V1/2	-21.2384			V1/2	-21				V1/2	-21.5044	0.717149								V1/2	-58.7869			V1/2	-51.6484			V1/2	-33.6397			V1/2	-56.7752			V1/2	-28.9899
	k	6.6926			k	6.97357			k	6.85019			k	7.65877			k	7.41643				k	7.11831	0.16187								k	6.10952			k	7.31177			k	12.7133			k	11.4938			k	8.05505
Chimera_S2				Chimera_S2				Chimera_S2																							Chimera_S2+Slc7a5 (1:1)				Chimera_S2+Slc7a5 (1:1)				Chimera_S2+Slc7a5 (1:1)				Chimera_S2+Slc7a5 (1:1)
2018_06_06_0017				2018_06_06_0019				2018_06_06_0026															AVERAGES								2018_06_14_0043				2018_06_14_0048				2018_06_14_0053				2018_06_14_0058
Voltage	Current 1-2 (tail current)	Normalized tail current		Voltage	Current 1-2 (tail current)	Normalized tail current		Voltage	Current 1-2 (tail current)	Normalized tail current													Voltage	Mean normalized tail current	st. error						Voltage	Current 1-2 (tail current)	Normalized tail current		Voltage	Current 1-2 (tail current)	Normalized tail current		Voltage	Current 1-2 (tail current)	Normalized tail current		Voltage	Current 1-2 (tail current)	Normalized tail current
-100	-0.02695	0.014363		-100	0.070155	0.111114		-100	0.033306	0.012104													-100	0.045861	0.026645						-100	0.015082	0.010721		-100	0.08502	0.002007		-100	0.139362	0		-100	0.233396	0
-90	-0.03774	0		-90	0.054239	0.07026		-90	0.034108	0.013254													-90	0.027838	0.017598						-90	0.009999	0		-90	0.084104	0		-90	0.158294	0.030364		-90	0.303373	0.0633
-80	-0.02707	0.014207		-80	0.026867	0		-80	0.035041	0.014594													-80	0.0096	0.00392						-80	0.010802	0.001694		-80	0.091588	0.016404		-80	0.219732	0.128905		-80	0.445784	0.192122
-70	-0.03083	0.00919		-70	0.028088	0.003133		-70	0.02603	0.001665													-70	0.004663	0.00188						-70	0.013564	0.00752		-70	0.123711	0.086819		-70	0.385323	0.394493		-70	0.746545	0.464183
-60	-0.0277	0.013363		-60	0.028956	0.005363		-60	0.024869	0													-60	0.006242	0.00317						-60	0.01701	0.014786		-60	0.211681	0.279652		-60	0.566553	0.685167		-60	1.01666	0.708524
-50	0.002406	0.053452		-50	0.035494	0.022145		-50	0.042258	0.024946													-50	0.033514	0.008166						-50	0.022302	0.025947		-50	0.316104	0.508551		-50	0.667654	0.847321		-50	1.18503	0.86083
-40	0.129888	0.2232		-40	0.103079	0.195625		-40	0.154503	0.185973													-40	0.201599	0.009107						-40	0.06966	0.125824		-40	0.39602	0.68373		-40	0.72567	0.940372		-40	1.26987	0.937573
-30	0.367596	0.539721		-30	0.215337	0.483776		-30	0.375797	0.503442													-30	0.50898	0.013379						-30	0.202026	0.404976		-30	0.460001	0.823978		-30	0.762847	1		-30	1.31732	0.980496
-20	0.542121	0.772111		-20	0.315704	0.741406		-20	0.551602	0.755653													-20	0.75639	0.007244						-20	0.331871	0.67881		-20	0.503747	0.919871		-20	0.759751	0.995035		-20	1.33031	0.992245
-10	0.627054	0.885204		-10	0.363582	0.8643		-10	0.645776	0.890755													-10	0.880086	0.006576						-10	0.410317	0.844249		-10	0.53059	0.97871		-10	0.759795	0.995105		-10	1.33888	1
0	0.693629	0.973852		0	0.407586	0.977253		0	0.696615	0.963688													0	0.971598	0.003327						0	0.458992	0.946903		0	0.540302	1		0	0.753267	0.984634		0	1.31795	0.981061
10	0.710132	0.995827		10	0.401294	0.961104		10	0.721926	1													10	0.985644	0.010066						10	0.477038	0.98496		10	0.52576	0.968123		10	0.733354	0.952696		10	1.29772	0.962765
20	0.713266	1		20	0.400062	0.95794		20	0.70364	0.973766													20	0.977235	0.010014						20	0.484169	1		20	0.514933	0.944389		20	0.714586	0.922594		20	1.26891	0.9367
30	0.684145	0.961224		30	0.398055	0.952788		30	0.691337	0.956116													30	0.95671	0.002003						30	0.480491	0.992243		30	0.504424	0.921354		30	0.704406	0.906267		30	1.23087	0.902289
40	0.664016	0.93442		40	0.416448	1		40	0.664206	0.917195													40	0.950538	0.020597						40	0.479014	0.989127		40	0.491686	0.893433		40	0.685191	0.875448		40	1.19725	0.871885
	V1/2	-30.9858			V1/2	-29.3406			V1/2	-30.0382												V1/2	-30.1215	0.389269								V1/2	-26.1321			V1/2	-50.4358			V1/2	-66.9961			V1/2	-69.0795
	k	7.59953			k	7.62909			k	7.02431												k	7.41764	0.16073								k	8.05003			k	9.64585			k	7.28872			k	8.02299
Chimera_S6				Chimera_S6				Chimera_S6																							Chimera_S6+Slc7a5 (1:1)				Chimera_S6+Slc7a5 (1:1)				Chimera_S6+Slc7a5 (1:1)				Chimera_S6+Slc7a5 (1:1)				Chimera_S6+Slc7a5 (1:1)
2018_06_13_0008				2018_06_13_0013				2018_06_13_0018															AVERAGES								2018_06_19_0012				2018_06_19_0021				2018_06_19_0026				2018_06_19_0031				2018_06_19_0036
Voltage	Current 1-2 (tail current)	Normalized tail current		Voltage	Current 1-2 (tail current)	Normalized tail current		Voltage	Current 1-2 (tail current)	Normalized tail current													Mean voltage	Mean normalized tail current	st. error						Voltage	Current 1-2 (tail current)	Normalized tail current		Voltage	Current 1-2 (tail current)	Normalized tail current		Voltage	Current 1-2 (tail current)	Normalized tail current		Voltage	Current 1-2 (tail current)	Normalized tail current		Voltage	Current 1-2 (tail current)	Normalized tail current
-100	0.002462	0.270505		-100	0.017875	0.078215		-100	0.012363	0.007506													-100	0.118742	0.06416						-100	0.055023	0.086498		-100	0.02738	0.025443		-100	0.041458	0.017021		-100	0.045584	0.031945		-100	0.01329	0.005402
-90	-0.0185	0		-90	0.011525	0.039915		-90	0.011471	0													-90	0.013305	0.010863						-90	0.05487	0.085758		-90	0.015002	0.000994		-90	0.039169	0.010809		-90	0.040661	0.023237		-90	0.011795	0.002996
-80	0.014375	0.424226		-80	0.009651	0.028612		-80	0.015696	0.035571													-80	0.162803	0.106738						-80	0.058157	0.101703		-80	0.016811	0.004568		-80	0.035645	0.001242		-80	0.032528	0.008849		-80	0.010849	0.001473
-70	-0.00815	0.133623		-70	0.004908	0		-70	0.015608	0.034837													-70	0.056153	0.032675						-70	0.056255	0.092478		-70	0.014499	0		-70	0.035187	0		-70	0.027525	0		-70	0.009995	9.82e-05
-60	-0.01118	0.094514		-60	0.014406	0.057289		-60	0.01772	0.052623													-60	0.068142	0.010822						-60	0.044248	0.034224		-60	0.025314	0.021361		-60	0.039444	0.011554		-60	0.035871	0.014764		-60	0.009933	0
-50	-0.01054	0.102662		-50	0.015198	0.062068		-50	0.016848	0.04528													-50	0.070003	0.013907						-50	0.037194	0		-50	0.048689	0.067531		-50	0.05542	0.054914		-50	0.057406	0.052859		-50	0.023315	0.021535
-40	-0.00825	0.132265		-40	0.041315	0.219596		-40	0.022855	0.095864													-40	0.149241	0.029976						-40	0.11384	0.371847		-40	0.140445	0.248763		-40	0.117172	0.222512		-40	0.152475	0.221035		-40	0.086121	0.122606
-30	-0.00019	0.236285		-30	0.076126	0.429568		-30	0.045215	0.284164													-30	0.316672	0.047451						-30	0.184136	0.712887		-30	0.298847	0.56163		-30	0.220505	0.502961		-30	0.321211	0.519529		-30	0.265671	0.411551
-20	0.025551	0.568441		-20	0.129976	0.754376		-20	0.082485	0.598026													-20	0.640281	0.047098						-20	0.229818	0.934514		-20	0.412619	0.786346		-20	0.313751	0.756036		-20	0.463171	0.770655		-20	0.45137	0.710392
-10	0.038599	0.736828		-10	0.164702	0.963831		-10	0.114563	0.868157													-10	0.856272	0.053725						-10	0.229313	0.932065		-10	0.501345	0.961592		-10	0.363724	0.891664		-10	0.540407	0.907286		-10	0.578247	0.914571
0	0.054363	0.94025		0	0.165216	0.966932		0	0.128291	0.983764													0	0.963649	0.010344						0	0.231849	0.944365		0	0.517396	0.993296		0	0.398697	0.986582		0	0.578036	0.973852		0	0.614288	0.972571
10	0.058994	1		10	0.170699	1		10	0.125937	0.963939													10	0.98798	0.009815						10	0.243316	1		10	0.520791	1		10	0.40062	0.9918		10	0.589819	0.994695		10	0.628159	0.994892
20	0.051501	0.903313		20	0.161083	0.942001		20	0.125811	0.962879													20	0.936064	0.014247						20	0.232976	0.949832		20	0.518231	0.994945		20	0.403641	1		20	0.592817	1		20	0.631332	1
30	0.045903	0.83107		30	0.149936	0.874766		30	0.130219	1													30								30	0.228351	0.927396		30	0.503636	0.966118		30	0.3918	0.967864		30	0.579323	0.976129		30	0.618118	0.978735
40	0.040851	0.765888		40	0.151713	0.885488		40	0.123951	0.947214													40								40	0.215404	0.864586		40	0.492864	0.944842		40	0.386856	0.954446		40	0.557351	0.937259		40	0.614517	0.97294
	V1/2	-24.089			V1/2	-29.9126			V1/2	-23.6566												V1/2	-25.8861	1.64699								V1/2	-35.6			V1/2	-31.7748			V1/2	-30.0253			V1/2	-30.5591			V1/2	-27.1027
	k	8.03885			k	7.0715			k	7.13138												k	7.41391	0.25552								k	5.7			k	7.41294			k	7.89747			k	7.57626			k	6.92414

## Sheet: Main Figure Disinhibition
Chimera_N1						with Slc7a5
	pre-train	post-train	fold disinhibition				pre-train	post-train	fold disinhibition
2018_08_01_0000	257.99	297.025	1.1513			2018_08_01_0027	58.0069	98.2594	1.69392
2018_08_01_0009	200.161	180.808	0.903311			2018_08_01_0033	50.8878	103.272	2.0294
2018_08_01_0015	149.706	148.331	0.990813			2018_08_01_0039	25.4768	47.9751	1.88309
2018_08_01_0021	407.671	247.387	0.606831			2018_08_01_0045	293.808	250.423	0.852335
Chimera S1						with Slc7a5
	pre-train	post-train	fold disinhibition				pre-train	post-train	fold disinhibition
2018_08_03_0001	5.75039	5.63049	0.979149			2018_08_09_0045	39.6489	104.23	2.62882
2018_08_03_0007	25.5308	27.4162	1.07385			2018_08_09_0051	17.6564	59.5795	3.37438
2018_08_03_0013	23.378	24.6495	1.05439			2018_08_09_0057	33.0127	60.8015	1.84176
2018_08_03_0019	9.73722	10.0579	1.03293			2018_08_09_0063	11.2283	82.7963	7.3739
2018_08_09_0000	7.28799	8.65453	1.18751			2018_08_03_0031	9.85846	76.792	7.78945
2018_08_09_0012	70.5812	78.1039	1.10658
2018_08_09_0018	45.2221	46.7113	1.03293
Chimera_S2						with Slc7a5
	pre-train	post-train	fold disinhibition				pre-train	post-train	fold disinhibition
2018_08_16_0005	97.1109	86.8829	0.894677			2018_08_09_0036	6.71975	25.6331	3.81459
2018_08_16_0013	77.2914	62.7452	0.8118			2018_08_16_0044	5.10488	27.5656	5.39986
2018_08_16_0019	151.897	169.109	1.11331			2018_08_16_0049	8.46523	56.3001	6.65075
2018_08_16_0026	184.894	284.344	1.53788			2018_08_16_0055	13.4615	89.5288	6.65075
2018_08_16_0032	150.041	181.884	1.21223
2018_08_16_0038	248.484	343.173	1.38107
Chimera_S6						with Slc7a5
	pre-train	post-train	fold disinhibition				pre-train	post-train	fold disinhibition
2018_08_01_0052	132.329	199.191	1.50527			2018_08_01_0073	23.2744	56.6682	2.43478
2018_08_01_0058	601.334	533.64	0.887427			2018_08_01_0085	37.5547	283.402	7.54637
2018_08_01_0064	34.7638	78.4451	2.25652			2018_08_01_0079	4.8526	52.0408	10.7243
2018_08_01_0021	407.671	247.387	0.606831			2018_06_19_0023	21.1022	162.61	7.70581
2018_09_26_0000	14.1076	29.8823	2.11817
2018_09_26_0006	31.1007	60.5183	1.94588
2018_09_26_0022	26.8748	28.0802	1.04485
2018_09_26_0027	7.7162	36.4148	4.71926
2018_06_13_0005	22.7729	44.7705	1.96595

## Sheet: Supplement 1
WT Kv1.2
		2019_03_03_0019.abf					2019_03_03_0012.abf					2019_03_03_0000.abf					2019_02_19_0101.abf					2019_02_19_0096Leak2000.abf
	Voltage (mV)	Tail Current Magnitude (pA)	Normalized Tail Current			Voltage (mV)	Tail Current Magnitude (pA)	Normalized Tail Current			Voltage (mV)	Tail Current Magnitude (pA)	Normalized Tail Current			Voltage (mV)	Tail Current Magnitude (pA)	Normalized Tail Current			Voltage (mV)	Tail Current Magnitude (pA)	Normalized Tail Current			Voltage (mV)	AVERAGE
	-130	4.88281	0.0085513			-130	20.752	0.0086284			-130	41.5039	0.0258144			-130	14.6484	0.0348584			-130	16.8311	0.0279441			-130	0.0211593
	-120	-14.6484	0.000503			-120	17.7002	0.0077296			-120	37.8418	0.0239705			-120	2.44141	0.0130719			-120	21.7139	0.0359281			-120	0.0162406
	-110	-0.610352	0.0062877			-110	-8.54492	0			-110	25.0244	0.0175169			-110	12.207	0.0305011			-110	12.5586	0.0209581			-110	0.0150528
	-100	-6.71387	0.0037726			-100	-1.83105	0.0019774			-100	22.583	0.0162876			-100	6.10352	0.0196078			-100	18.6621	0.0309381			-100	0.0145167
	-90	-15.8691	0			-90	-3.05176	0.0016178			-90	12.8174	0.0113706			-90	3.66211	0.0152505			-90	16.2207	0.0269461			-90	0.011037
	-80	-12.8174	0.0012575			-80	3.66211	0.0035952			-80	14.0381	0.0119852			-80	4.27246	0.0163399			-80	11.9482	0.0199601			-80	0.0106276
	-70	13.4277	0.0120724			-70	4.88281	0.0039547			-70	1.2207	0.0055317			-70	-0.610352	0.0076253			-70	8.89648	0.0149701			-70	0.00883082
	-60	1.2207	0.0070423			-60	3.66211	0.0035952			-60	-9.15527	0.0003073			-60	1.2207	0.0108932			-60	4.01367	0.006986			-60	0.0057648
	-50	9.76562	0.0105634			-50	12.207	0.0061118			-50	-7.32422	0.0012293			-50	0.610352	0.0098039			-50	7.06543	0.011976			-50	0.00793688
	-40	34.79	0.0208753			-40	39.0625	0.0140212			-40	-9.76562	0			-40	-4.88281	0			-40	-0.25879	0			-40	0.00697929
	-30	234.985	0.10337			-30	240.479	0.0733417			-30	135.498	0.0731407			-30	7.32422	0.0217865			-30	30.2588	0.0499002			-30	0.0643079
	-20	830.688	0.348843			-20	916.748	0.272515			-20	620.728	0.317455			-20	84.2285	0.159041			-20	140.732	0.230539			-20	0.265679
	-10	1448.36	0.60337			-10	1654.66	0.489844			-10	1127.93	0.572833			-10	255.127	0.464052			-10	341.538	0.558882			-10	0.537796
	0	1864.01	0.774648			0	2191.16	0.647852			0	1486.21	0.753227			0	392.456	0.70915			0	489.243	0.800399			0	0.737055
	10	2106.93	0.874749			10	2525.63	0.74636			10	1741.33	0.881684			10	507.812	0.915033			10	576.523	0.943114			10	0.872188
	20	2267.46	0.940895			20	2827.15	0.835161			20	1864.01	0.943454			20	534.058	0.961874			20	602.769	0.986028			20	0.933482
	30	2354.13	0.97661			30	3093.87	0.913716			30	1928.1	0.975722			30	555.42	1			30	611.313	1			30	0.973209
	40	2379.15	0.986922			40	3273.32	0.966565			40	1976.32	1			40	544.434	0.980392			40	597.886	0.978044			40	0.982384
	50	2374.27	0.984909			50	3341.67	0.986698			50	1967.16	0.99539			50	549.316	0.989107			50	609.482	0.997006			50	0.990622
	60	2410.89	1			60	3375.85	0.996764			60	1932.37	0.977873			60	523.682	0.943355			60	580.186	0.949102			60	0.973419
	70	2406.62	0.998239			70	3386.84	1			70	1892.09	0.957591			70	518.799	0.93464			70	569.81	0.932136			70	0.964521
	80	2406.62	0.998239			80	3385.62	0.999641			80	1842.04				80	526.123	0.947712			80	575.303	0.941118			80	0.967847
	90	2385.86	0.989688			90	3334.96	0.98472			90	1811.52				90	479.126	0.863834			90	550.278	0.9002			90	0.947908
	100	2355.35	0.977113			100	3298.95				100	1755.98				100	490.112				100	554.551				100	0.975614
	110	2346.8				110	3255				110	1698.61				110	481.567				110	560.654				110	0.973592
																											Average	SD	SEM
		z->	2.62746				z->	1.98211				z->	2.73635				z->	3.32698				z->	3.49382			z->	2.83408	0.603215	0.269766
		V1/2->	-12.7779				V1/2->	-6.29562				V1/2->	-11.5143				V1/2->	-7.8367				V1/2->	-11.1547			V1/2->	-9.91671	2.72702	1.21956
WT Kv1.2 + Slc7a5
		2019_04_24_0090.abf					2019_04_24_0080.abf					2019_03_02_0108.abf					2019_02_24_0010Leak.abf					2019_02_24_0001.abf
	Voltage (mV)	Tail Current Magnitude (pA)	Normalized Tail Current			Voltage (mV)	Tail Current Magnitude (pA)	Normalized Tail Current			Voltage (mV)	Tail Current Magnitude (pA)	Normalized Tail Current			Voltage (mV)	Tail Current Magnitude (pA)	Normalized Tail Current			Voltage (mV)	Tail Current Magnitude (pA)	Normalized Tail Current			Voltage (mV)	AVERAGE
	-130	37.2314	0.0235955			-130	27.4658	0.0096692			-130	53.1006	0			-130	102.891	0			-130	20.752	0.0319489			-130	0.0130427
	-120	24.4141	0			-120	18.9209	0.0025445			-120	64.6973	0.0056989			-120	110.825	0.0108514			-120	14.6484	0			-120	0.00381896
	-110	28.0762	0.0067416			-110	15.8691	0			-110	75.6836	0.0110978			-110	124.863	0.0300501			-110	28.0762	0.0702875			-110	0.0236354
	-100	32.3486	0.0146067			-100	19.5312	0.0030534			-100	89.1113	0.0176965			-100	114.487	0.0158598			-100	26.2451	0.0607029			-100	0.0223839
	-90	26.8555	0.0044944			-90	20.1416	0.0035623			-90	132.446	0.0389922			-90	116.929	0.0191987			-90	21.3623	0.0351438			-90	0.0202783
	-80	40.8936	0.0303371			-80	37.2314	0.0178117			-80	191.04	0.0677864			-80	129.136	0.0358932			-80	27.4658	0.0670927			-80	0.0437842
	-70	71.4111	0.0865169			-70	126.953	0.0926209			-70	332.642	0.137373			-70	148.057	0.0617696			-70	29.9072	0.0798722			-70	0.0916304
	-60	134.888	0.203371			-60	515.747	0.416794			-60	753.784	0.344331			-60	262.192	0.217863			-60	62.8662	0.252396			-60	0.286951
	-50	266.724	0.446067			-50	892.334	0.730789			-50	1172.49	0.55009			-50	465.439	0.495826			-50	100.098	0.447284			-50	0.534011
	-40	377.197	0.649438			-40	1087.04	0.89313			-40	1535.03	0.728254			-40	637.559	0.731219			-40	149.536	0.70607			-40	0.741622
	-30	479.736	0.838202			-30	1159.06	0.953181			-30	1784.67	0.85093			-30	771.836	0.914858			-30	175.171	0.840256			-30	0.879485
	-20	536.499	0.942697			-20	1196.29	0.984224			-20	1948.85	0.931614			-20	811.509	0.969115			-20	193.481	0.936102			-20	0.95275
	-10	546.265	0.960674			-10	1190.19	0.979135			-10	2014.77	0.964007			-10	834.092	1			-10	199.585	0.968051			-10	0.974373
	0	560.303	0.986517			0	1215.21	1			0	2072.14	0.992202			0	825.547	0.988314			0	198.364	0.961661			0	0.985739
	10	567.627	1			10	1207.28	0.993384			10	2088.01	1			10	834.092	1			10	199.585	0.968051			10	0.992287
	20	567.017	0.998876			20	1204.83	0.991349			20	2071.53	0.991902			20	827.988	0.991653			20	203.857	0.990415			20	0.992839
	30	537.109	0.94382			30	1195.07	0.983206			30	2045.9	0.979304			30	818.833	0.979132			30	205.688	1			30	0.977092
	40	548.706	0.965168			40	1184.69	0.974555			40	2039.18	0.976005			40	812.729	0.970785			40	196.533	0.952077			40	0.967718
	50	541.992	0.952809			50	1181.03	0.971501			50	2052	0.982303			50	795.64	0.947412			50	202.026	0.980831			50	0.966971
	60	545.654	0.959551			60	1192.63	0.98117			60	2039.79				60	778.55	0.92404			60	203.857				60	0.97686
	70	523.071	0.917978			70	1172.49	0.964377			70	2026.98				70	777.939	0.923205			70	195.923				70	0.95031
	80	532.837	0.935955			80	1169.43	0.961832			80	2001.34				80	740.708	0.872287			80	198.975				80	0.955013
	90	510.254	0.894382			90	1151.73	0.947074			90	1982.42				90	716.904				90	197.144				90	0.929855
	100	512.695	0.898876			100	1157.23	0.951654			100	1970.21				100	719.956				100	200.806				100	0.930881
	110	502.93	0.880899			110	1155.4	0.950127			110	1960.45				110	704.697				110	183.716				110	0.92278
		z->	2.52384				z->	3.69685				z->	2.21176				z->	3.01362				z->	2.39972			z->	2.76908	0.597546	0.267231
		V1/2->	-46.838				V1/2->	-56.8373				V1/2->	-51.5844				V1/2->	-49.2964				V1/2->	-48.2037			V1/2->	-50.5519	3.91966	1.75292
Loop Replacement
		2018_10_31_0040					2020_06_15_0001.abf					2020_06_15_0007.abf					2020_06_15_0010.abf					2020_06_15_0013.abf					2020_06_15_0004.abf
	Voltage (mV)	Tail Current Magnitude (pA)	Normalized Tail Current			Voltage (mV)	Tail Current Magnitude (pA)	Normalized Tail Current			Voltage (mV)	Tail Current Magnitude (pA)	Normalized Tail Current			Voltage (mV)	Tail Current Magnitude (pA)	Normalized Tail Current			Voltage (mV)	Tail Current Magnitude (pA)	Normalized Tail Current			Voltage (mV)	Tail Current Magnitude (pA)	Normalized Tail Current			Voltage (mV)	AVERAGE
	-130					-130	67.1387	0.027668			-130	-91.5527	0.0087464			-130	103.76	0.0635593			-130	128.174	0.0188679			-130	12.207	0.0100334			-130	0.025775
	-120					-120	48.8281	0.0158103			-120	-91.5527	0.0087464			-120	85.4492	0.0508475			-120	128.174	0.0188679			-120	-12.207	0.0033445			-120	0.0195233
	-110					-110	48.8281	0.0158103			-110	-85.4492	0.0116618			-110	79.3457	0.0466102			-110	97.6562	0.0110063			-110	-18.3105	0.0016722			-110	0.0173522
	-100	0.171968	0.171968			-100	54.9316	0.0197628			-100	-103.76	0.0029155			-100	73.2422	0.0423729			-100	79.3457	0.0062893			-100	0	0.006689			-100	0.0416663
	-90	0.135712	0.135712			-90	30.5176	0.0039526			-90	-103.76	0.0029155			-90	42.7246	0.0211864			-90	73.2422	0.004717			-90	0	0.006689			-90	0.0291954
	-80	0.116825	0.116825			-80	36.6211	0.0079051			-80	-91.5527	0.0087464			-80	42.7246	0.0211864			-80	85.4492	0.0078616			-80	-18.3105	0.0016722			-80	0.0273662
	-70	0.0998744	0.0998744			-70	36.6211	0.0079051			-70	-103.76	0.0029155			-70	24.4141	0.0084746			-70	61.0352	0.0015723			-70	-24.4141	0			-70	0.0201236
	-60	0.052213	0.052213			-60	24.4141	0			-60	-103.76	0.0029155			-60	24.4141	0.0084746			-60	79.3457	0.0062893			-60	-6.10352	0.0050167			-60	0.0124848
	-50	0.0385581	0.0385581			-50	30.5176	0.0039526			-50	-109.863	0			-50	12.207	0			-50	54.9316	0			-50	-12.207	0.0033445			-50	0.0076425
	-40	0	0			-40	36.6211	0.0079051			-40	-85.4492	0.0116618			-40	18.3105	0.0042373			-40	91.5527	0.009434			-40	6.10352	0.0083612			-40	0.0069332
	-30	0.0082139	0.0082139			-30	122.07	0.0632411			-30	79.3457	0.090379			-30	79.3457	0.0466102			-30	482.178	0.110063			-30	152.588	0.048495			-30	0.061167
	-20	0.199958	0.199958			-20	512.695	0.316205			-20	573.73	0.326531			-20	402.832	0.271186			-20	1312.26	0.323899			-20	787.353	0.222408			-20	0.276698
	-10	0.477085	0.477085			-10	1049.8	0.664032			-10	1177.98	0.61516			-10	915.527	0.627119			-10	2044.68	0.512579			-10	1696.78	0.471572			-10	0.561258
	0	0.767866	0.767866			0	1312.26	0.833992			0	1611.33	0.822157			0	1257.32	0.864407			0	2667.24	0.672956			0	2435.3	0.673913			0	0.772549
	10	0.986188	0.986188			10	1483.15	0.944664			10	1849.37	0.93586			10	1416.02	0.974576			10	3063.96	0.775157			10	2984.62	0.824415			10	0.90681
	20	0.996599	0.996599			20	1525.88	0.972332			20	1928.71	0.973761			20	1422.12	0.978814			20	3393.55	0.860063			20	3277.59	0.904682			20	0.947708
	30	1	1			30	1568.6	1			30	1965.33	0.991254			30	1452.64	1			30	3588.87	0.910377			30	3472.9	0.958194			30	0.976638
	40	0.994716	0.994716			40	1531.98	0.976285			40	1983.64	1			40	1428.22	0.983051			40	3741.45	0.949685			40	3570.56	0.98495			40	0.981448
	50					50	1519.78	0.968379			50	1965.33	0.991254			50	1391.6	0.957627			50	3845.21	0.976415			50	3625.49	1			50	0.978735
	60					60	1519.78	0.968379			60	1922.61	0.970846			60	1391.6	0.957627			60	3912.35	0.993711			60	3576.66	0.986622			60	0.975437
	70					70	1495.36	0.952569			70	1898.19	0.959184			70	1391.6	0.957627			70	3936.77	1			70	3564.45	0.983278			70	0.970531
	80					80	1440.43	0.916996			80	1892.09	0.956268			80	1348.88				80	3918.46	0.995283			80	3436.28	0.94816			80	0.954177
	90					90	1470.95	0.936759			90	1873.78	0.947522			90	1306.15				90	3887.94	0.987421			90	3326.42	0.91806			90	0.947441
	100					100	1458.74	0.928854			100	1855.47				100	1312.26				100	3833.01				100	3271.48	0.90301			100	0.915932
	110					110	1416.02	0.901186			110	1812.74				110	1287.84				110	3765.87				110	3167.72				110
		z->	3.72583				z->	3.51144				z->	3.15282				z->	3.90343				z->	1.97705				z->	2.51354			z->	3.13068	0.749473	0.305971
		V1/2->	-9.34425				V1/2->	-14.0236				V1/2->	-13.4312				V1/2->	-13.1915				V1/2->	-8.22779				V1/2->	-7.23019			V1/2->	-10.9081	2.98138	1.21715
Loop Replacement + Slc7a5
		2018_10_31_0009					2018_10_31_0051					2018_10_31_0058					2020_06_15_0016.abf					2020_06_15_0020.abf
	Voltage (mV)	Tail Current Magnitude (pA)	Normalized Tail Current			Voltage (mV)	Tail Current Magnitude (pA)	Normalized Tail Current			Voltage (mV)	Tail Current Magnitude (pA)	Normalized Tail Current			Voltage (mV)	Tail Current Magnitude (pA)	Normalized Tail Current			Voltage (mV)	Tail Current Magnitude (pA)	Normalized Tail Current				Voltage (mV)	AVERAGE
	-130					-130					-130					-130	73.2422	0.0086207			-130	122.07	0.0013038				-130	0.004962
	-120					-120					-120					-120	79.3457	0.0172414			-120	134.277	0.0039113				-120	0.010576
	-110					-110					-110					-110	67.1387	0			-110	115.967	0				-110	0
	-100	0.020684	0.154192			-100	0.0345974	0			-100	0.015233	0.0259			-100	91.5527	0.0344828			-100	128.174	0.0026076				-100	0.043436
	-90	0.018175	0.098802			-90	0.042571	0.017144			-90	0.016454	0.056222			-90	85.4492	0.0258621			-90	152.588	0.0078227				-90	0.041171
	-80	0.013699	0			-80	0.050103	0.033339			-80	0.015233	0.0259			-80	103.76	0.0517241			-80	183.105	0.0143416				-80	0.025061
	-70	0.015225	0.033683			-70	0.0662708	0.068102			-70	0.014191	0			-70	109.863	0.0603448			-70	311.279	0.041721				-70	0.04077
	-60	0.022278	0.189371			-60	0.104762	0.150863			-60	0.016429	0.055591			-60	183.105	0.163793			-60	799.56	0.146024				-60	0.141128
	-50	0.041741	0.619012			-50	0.219443	0.397442			-50	0.032349	0.451042			-50	335.693	0.37931			-50	2038.57	0.410691				-50	0.4515
	-40	0.052016	0.845808			-40	0.350305	0.678813			-40	0.045522	0.778269			-40	543.213	0.672414			-40	3283.69	0.676662				-40	0.730393
	-30	0.059001	1			-30	0.444247	0.880801			-30	0.054448	1			-30	689.697	0.87931			-30	4052.73	0.840939				-30	0.92021
	-20	0.058831	0.996257			-20	0.481388	0.960658			-20	0.053304	0.971573			-20	750.732	0.965517			-20	4467.77	0.929596				-20	0.96472
	-10	0.055881	0.931138			-10	0.499685	1			-10	0.051956	0.938092			-10	775.146	1			-10	4687.5	0.976532				-10	0.969152
	0	0.05344	0.877245			0	0.490257	0.979729			0	0.050456	0.900821			0	775.146	1			0	4797.36	1				0	0.951559
	10	0.049744	0.795659			10	0.487647	0.974116			10	0.049057	0.866077			10	762.939	0.982759			10	4791.26	0.998696				10	0.923461
	20	0.047574	0.747754			20	0.478829	0.955157			20	0.047607	0.83007			20	738.525	0.948276			20	4742.43	0.988266				20	0.893905
	30	0.045302	0.697605			30	0.475427	0.947842			30	0.046056	0.791535			30	750.732	0.965517			30	4669.19	0.972621				30	0.875024
	40	0.042352	0.632485			40	0.463311	0.92179			40	0.044098	0.742893			40	750.732	0.965517			40	4553.22	0.947849				40	0.842107
	50					50					50					50	708.008	0.905172			50	4425.05	0.920469				50	0.912821
	60					60					60					60	689.697	0.87931			60	4272.46	0.887875				60	0.883593
	70					70					70					70	695.801	0.887931			70	4125.98	0.856584				70	0.872258
	80					80					80					80	683.594	0.87069			80	3942.87	0.817471				80	0.84408
	90					90					90					90	634.766	0.801724			90	3814.7	0.790091				90	0.795908
	100					100					100					100	646.973	0.818966			100	3674.32	0.760104				100	0.789535
	110					110					110					110	610.351	0.767241			110	3552.25	0.734029				110	0.750635
		z->	4.34953				z->	3.05692				z->	4.72793				z->	3.02408				z->	2.91699				z->	3.61509	0.855283	0.382494
		V1/2->	-52.1285				V1/2->	-46.3812				V1/2->	-48.1085				V1/2->	-46.1564				V1/2->	-46.0133				V1/2->	-47.7576	2.58499	1.15604
I257F
		2018_09_26_0035					2018_09_26_0041					2018_09_26_0052					2018_09_26_0058					2020_06_19_0058.abf					2020_06_19_0061Leak.abf					2020_06_19_0062.abf
	Voltage (mV)	Tail Current Magnitude (pA)	Normalized Tail Current			Voltage (mV)	Tail Current Magnitude (pA)	Normalized Tail Current			Voltage (mV)	Tail Current Magnitude (pA)	Normalized Tail Current			Voltage (mV)	Tail Current Magnitude (pA)	Normalized Tail Current			Voltage (mV)	Tail Current Magnitude (pA)	Normalized Tail Current			Voltage (mV)	Tail Current Magnitude (pA)	Normalized Tail Current			Voltage (mV)	Tail Current Magnitude (pA)	Normalized Tail Current			Voltage (mV)	AVERAGE
	-130					-130					-130					-130					-130	36.6211	0.0114943			-130	-2.07031	0.0088235			-130	52.8613	0.0122324			-130	0.01085
	-120					-120					-120					-120					-120	30.5176	0.0098522			-120	10.1367	0.0147059			-120	34.5508	0.0030581			-120	0.009205
	-110					-110					-110					-110					-110	30.5176	0.0098522			-110	4.0332	0.0117647			-110	40.6543	0.0061162			-110	0.009244
	-100	-0.0439	0			-100	0.0129046	0.092058			-100	0.043476	0.272036			-100	0.060289	0.020821			-100	18.3105	0.0065681			-100	4.0332	0.0117647			-100	34.5508	0.0030581			-100	0.058044
	-90	-0.01725	0.041804			-90	0.0117188	0.080368			-90	0.033249	0.224355			-90	0.065426	0.028395			-90	6.10352	0.0032841			-90	-2.07031	0.0088235			-90	40.6543	0.0061162			-90	0.056164
	-80	-0.01723	0.041847			-80	0.0107247	0.070569			-80	0.027585	0.197946			-80	0.060086	0.020521			-80	12.207	0.0049261			-80	-2.07031	0.0088235			-80	40.6543	0.0061162			-80	0.050107
	-70	-0.04121	0.004222			-70	0.00850133	0.048651			-70	0.012505	0.127637			-70	0.046166	0			-70	0	0.001642			-70	-14.2773	0.0029412			-70	34.5508	0.0030581			-70	0.026879
	-60	-0.03552	0.013144			-60	0.00633894	0.027334			-60	0.003878	0.087417			-60	0.047116	0.0014			-60	18.3105	0.0065681			-60	-20.3808	0			-60	28.4473	0			-60	0.019409
	-50	-0.03641	0.011751			-50	0.00423758	0.006619			-50	-0.01116	0.017282			-50	0.047133	0.001425			-50	-6.10352	0			-50	-14.2773	0.0029412			-50	40.6543	0.0061162			-50	0.006591
	-40	-0.04125	0.004156			-40	0.00508336	0.014956			-40	-0.01487	0			-40	0.052626	0.009523			-40	6.10352	0.0032841			-40	-2.07031	0.0088235			-40	65.0684	0.0183486			-40	0.008442
	-30	-0.01767	0.041151			-30	0.0035662	0			-30	0.012929	0.129615			-30	0.092841	0.068813			-30	103.76	0.0295567			-30	126.104	0.0705882			-30	174.932	0.0733945			-30	0.059017
	-20	0.122807	0.261528			-20	0.0123989	0.087072			-20	0.065836	0.376284			-20	0.249125	0.299223			-20	701.904	0.190476			-20	528.935	0.264706			-20	589.971	0.281346			-20	0.251519
	-10	0.327289	0.582312			-10	0.0524728	0.482121			-10	0.162294	0.825999			-10	0.413937	0.542205			-10	1721.19	0.464696			-10	1066.04	0.523529			-10	1053.84	0.513761			-10	0.562089
	0	0.439524	0.758384			0	0.0864607	0.817174			0	0.196935	0.987507			0	0.561184	0.759292			0	2648.93	0.714286			0	1474.98	0.720588			0	1426.15	0.700306			0	0.779648
	10	0.531257	0.902291			10	0.104832	0.998281			10	0.19133	0.961376			10	0.655568	0.898443			10	3265.38	0.880131			10	1719.12	0.838235			10	1700.81	0.83792			10	0.902383
	20	0.58322	0.98381			20	0.104771	0.997679			20	0.199615	1			20	0.701531	0.966206			20	3607.18	0.972085			20	1896.12	0.92353			20	1865.61	0.920489			20	0.966257
	30	0.579114	0.977368			30	0.100307	0.95367			30	0.1943	0.975222			30	0.724453	1			30	3680.42	0.99179			30	2012.09	0.979412			30	1987.68	0.981651			30	0.979873
	40	0.593541	1			40	0.105007	1			40	0.189708	0.95381			40	0.715247	0.986427			40	3710.94	1			40	2054.81	1			40	2024.3	1			40	0.991463
	50					50					50					50					50	3619.38	0.97537			50	2054.81	1			50	2024.3	1			50	0.99179
	60					60					60					60					60	3570.56	0.962233			60	2042.61	0.994118			60	2018.19	0.996942			60	0.984431
	70					70					70					70					70	3485.11				70	2005.99	0.976471			70	1987.68	0.981651			70	0.965789
	80					80					80					80					80	3411.86				80	1938.85	0.944118			80	1938.85	0.957187			80
	90					90					90					90					90	3356.93				90	1926.64	0.938235			90	1890.02	0.932722			90
	100					100					100					100					100	3302				100	1871.71	0.911765			100	1816.78	0.896025			100
	110					110					110					110					110	3173.83				110	1853.4	0.902941			110	1798.47	0.88685			110
		z->	3.09929				z->	4.86437				z->	4.79621				z->	2.85969				z->	3.10193				z->	2.57394				z->	2.46648			z->	3.39483	1.00946	0.381539
		V1/2->	-11.1826				V1/2->	-9.09167				V1/2->	-17.8233				V1/2->	-11.0753				V1/2->	-8.00818				V1/2->	-9.41124				V1/2->	-9.19585			V1/2->	-10.8272	3.28513	1.24166
I257F + Slc7a5
		2018_09_05_117					2018_09_05_123					2018_09_05_108					2020_06_19_0053.abf					2020_06_19_0055.abf					2020_06_19_0056Leak.abf					2020_06_19_0051.abf
	Voltage (mV)	Tail Current Magnitude (pA)	Normalized Tail Current			Voltage (mV)	Tail Current Magnitude (pA)	Normalized Tail Current			Voltage (mV)	Tail Current Magnitude (pA)	Normalized Tail Current			Voltage (mV)	Tail Current Magnitude (pA)	Normalized Tail Current			Voltage (mV)	Tail Current Magnitude (pA)	Normalized Tail Current			Voltage (mV)	Tail Current Magnitude (pA)	Normalized Tail Current			Voltage (mV)	Tail Current Magnitude (pA)	Normalized Tail Current			Voltage (mV)	AVERAGE
	-130					-130					-130					-130	-24.4141	0.0145773			-130	-36.6211	0			-130	181.035	0			-130	-97.6562	0.0327381			-130	0.011829
	-120					-120					-120					-120	-54.9316	0			-120	-12.207	0.0047847			-120	199.346	0.00369			-120	-103.76	0.0297619			-120	0.009559
	-110					-110					-110					-110	-42.7246	0.0058309			-110	0	0.007177			-110	235.967	0.0110701			-110	-103.76	0.0297619			-110	0.01346
	-100	0.127355	0			-100	0.149627	0			-100	0.029609	0.077585			-100	-24.4141	0.0145773			-100	54.9316	0.0179426			-100	248.174	0.0135301			-100	-164.795	0			-100	0.017662
	-90	0.152397	0.041085			-90	0.169937	0.027152			-90	0.023167	0			-90	-6.10352	0.0233236			-90	109.863	0.0287081			-90	333.623	0.0307503			-90	-103.76	0.0297619			-90	0.025826
	-80	0.186001	0.096218			-80	0.230947	0.108713			-80	0.028024	0.058501			-80	54.9316	0.0524781			-80	305.176	0.0669856			-80	516.728	0.0676507			-80	-79.3457	0.0416667			-80	0.070316
	-70	0.326992	0.327535			-70	0.359679	0.280811			-70	0.032323	0.110277			-70	396.728	0.215743			-70	1013.18	0.205742			-70	1206.43	0.206642			-70	250.244	0.202381			-70	0.221304
	-60	0.557688	0.706025			-60	0.655946	0.676881			-60	0.060659	0.451588			-60	1153.56	0.577259			-60	2575.68	0.511962			-60	2738.41	0.515375			-60	909.424	0.52381			-60	0.566128
	-50	0.68635	0.917115			-50	0.845843	0.930748			-50	0.08193	0.707805			-50	1739.5	0.857143			-50	3814.7	0.754785			-50	3940.8	0.757688			-50	1348.88	0.738095			-50	0.809054
	-40	0.708392	0.953279			-40	0.897645	1			-40	0.098864	0.911779			-40	1989.75	0.976676			-40	4492.19	0.88756			-40	4630.5	0.896679			-40	1666.26	0.892857			-40	0.931261
	-30	0.736869	1			-30	0.882854	0.980226			-30	0.106188	1			-30	2032.47	0.997085			-30	4864.5	0.960526			-30	4966.19	0.96433			-30	1733.4	0.925595			-30	0.975395
	-20	0.735422	0.997625			-20	0.861232	0.95132			-20	0.101552	0.944158			-20	2026.37	0.994169			-20	5004.88	0.988038			-20	5124.88	0.99631			-20	1776.12	0.946429			-20	0.974007
	-10	0.734689	0.996424			-10	0.843402	0.927484			-10	0.094241	0.856093			-10	2038.57	1			-10	5065.92	1			-10	5143.19	1			-10	1806.64	0.96131			-10	0.963044
	0	0.73666	0.999657			0	0.802638	0.872988			0	0.085488	0.750665			0	2008.06	0.985423			0	5059.81	0.998804			0	5130.99	0.99754			0	1812.74	0.964286			0	0.93848
	10	0.704922	0.947585			10	0.78699	0.852069			10	0.078891	0.671203			10	1977.54	0.970846			10	5023.19	0.991627			10	5057.74	0.98278			10	1837.16	0.97619			10	0.913186
	20	0.695034	0.931363			20	0.748771	0.800976			20	0.067372	0.532457			20	1971.44	0.96793			20	4937.74	0.97488			20	4984.5	0.96802			20	1818.85	0.967262			20	0.877555
	30	0.677665	0.902867			30	0.718669	0.760733			30	0.074749	0.621305			30	1916.5	0.941691			30	4858.4	0.95933			30	4899.05	0.9508			30	1879.88	0.997024			30	0.87625
	40	0.656059	0.867418			40	0.690827	0.723512			40	0.072099	0.589395			40	1904.3	0.93586			40	4827.88	0.953349			40	4819.71	0.934809			40	1867.68	0.991071			40	0.856488
	50					50					50					50	1879.88	0.924198			50	4748.53	0.937799			50	4746.46	0.920049			50	1885.99	1			50	0.945512
	60					60					60					60	1837.16	0.90379			60	4687.5	0.925837			60	4636.6	0.897909			60	1855.47	0.985119			60	0.928164
	70					70					70					70	1776.12				70	4589.84				70	4520.63	0.874539			70	1855.47	0.985119			70	0.910248
	80					80					80					80	1776.12				80	4522.7				80	4453.5	0.861009			80	1837.16	0.97619			80	0.901344
	90					90					90					90	1770.02				90	4455.57				90	4368.05	0.843788			90	1824.95	0.970238			90	0.891532
	100					100					100					100	1739.5				100	4351.81				100	4307.01				100	1794.43	0.955357			100	0.882298
	110					110					110					110	1727.29				110	4272.46				110	4221.56				110	1818.85				110
		z->	3.90886				z->	4.12745				z->	3.3792				z->	3.99997				z->	3.03076				z->	3.07858				z->	2.95988			z->	3.49782	0.50248	0.18992
		V1/2->	-65.4943				V1/2->	-64.6565				V1/2->	-57.3572				V1/2->	-61.8681				V1/2->	-59.5299				V1/2->	-59.6877				V1/2->	-59.281			V1/2->	-61.125	3.00891	1.13726

## Sheet: Supplement 2
Kv1.1[1.2VSD] Disinhibition							Kv1.1[1.2VSD] + Slc7a5
		Pre-train (pA/pF)	Post-train (pA/pF)	Fold disinhibition				Pre-train (pA/pF)	Post-train (pA/pF)	Fold disinhibition
	2019_02_20_0006	353.179	354.646	1.00415			2019_03_06_0027	5.40887	29.8683	5.52209
	2019_02_20_0011	181.391	169.15	0.932515			2019_03_06_0034	7.10213	156.865	22.087
	2019_02_27_0026	302.989	257.693	0.850503			2019_03_06_0041	20.2741	265.882	13.1143
	2019_02_28_0000	33.1	26.477	0.799909			2019_03_06_0051	6.62158	13.7371	2.0746
	2019_02_28_0056	701.72	545.426	0.77727			2019_02_28_0030	7.32829	54.0426	7.37451
	2019_02_28_0068	218.636	193.459	0.884845			2019_02_28_0037	26.1916	163.52	6.24322
	2019_02_28_0075	150.85	202.647	1.34337			2019_02_28_0050	17.888	47.1008	2.6331
	2019_02_28_0082	219.854	185.054	0.841714
	2019_03_06_0070	77.9459	107.439	1.37838
Kv1.2[1.1VSD] Disinhibition							Kv1.2[1.1VSD]+Slc7a5
		Pre-train (pA/pF)	Post-train (pA/pF)	Fold disinhibition				Pre-train (pA/pF)	Post-train (pA/pF)	Fold disinhibition
	2019_03_22_0013	9.18159	50.2026	5.46775			2019_03_22_0000	4.68221	8.86401	1.89313
	2019_03_27_0000	14.8638	52.5154	3.5331			2019_03_22_0020	5.52433	17.9393	3.24733
	2019_04_04_0007	17.1813	38.4603	2.2385			2019_03_22_0027	5.49781	19.9418	3.62722
	2019_04_04_0014	19.2395	132.195	6.871			2019_03_28_0026	8.6787	19.5917	2.25745
	2019_04_04_0021	4.12161	12.402	3.00902			2019_04_04_0031	4.02228	6.67351	1.65914
	2019_04_05_0015	4.84435	17.0408	3.51767			2019_04_10_0015	5.82702	30.1219	5.16935
							2019_04_10_0025	13.1786	174.954	13.2756
							2019_04_10_0042	8.25629	26.511	3.21101
							2019_04_10_0054	12.7105	62.58	4.92347
Kv1.1[1.2VSD]																																				Kv1.1[1.2VSD] + Slc7a5
2019_03_06_062				2019_03_06_075				2019_03_06_078				2019_02_28_060				2019_02_28_072				2019_02_28_079				2019_02_27_030					AVERAGES							2019_02_20_024				2019_02_20_027				2019_02_20_039				2019_02_28_042
Voltage	Current 1-2 (tail current)	Normalized tail current		Voltage	Current 1-2 (tail current)	Normalized tail current		Voltage	Current 1-2 (tail current)	Normalized tail current		Voltage	Current 1-2 (tail current)	Normalized tail current		Voltage	Current 1-2 (tail current)	Normalized tail current		Voltage	Current 1-2 (tail current)	Normalized tail current		Voltage	Current 1-2 (tail current)	Normalized tail current			Mean voltage	Mean normalized tail current	st. error					Voltage	Current 1-2 (tail current)	Normalized tail current		Voltage	Current 1-2 (tail current)	Normalized tail current		Voltage	Current 1-2 (tail current)	Normalized tail current		Voltage	Current 1-2 (tail current)
-100	0.021782	0.060976		-100	0.020091	0.052074		-100	0.020947	0.027455		-100	0.029248	0.045378		-100	0.001196	0.057663		-100	0.064673	0.019969		-100	0.057373	0.011057			-100	0.039225	0.006879					-100	0.152187	0.067227		-100	0.089526	0		-100	0.33019	0.173241		-100	0.027676
-90	0.008354	0.007317		-90	0.006053	0.031774		-90	0.013013	0.013728		-90	0.03291	0.055462		-90	0.001807	0.059181		-90	0.064673	0.019969		-90	0.058594	0.012285			-90	0.028531	0.007398					-90	0.166836	0.10084		-90	0.093799	0.0112		-90	0.356436	0.206497		-90	0.021572
-80	0.008965	0.009756		-80	0.003001	0.027361		-80	0.005078	0		-80	0.031079	0.05042		-80	-0.0104	0.028832		-80	0.056738	0		-80	0.046387	0			-80	0.016624	0.006825					-80	0.194912	0.165266		-80	0.106616	0.0448		-80	0.457144	0.334107		-80	0.028896
-70	0.010796	0.017073		-70	-0.00554	0.015004		-70	0.009961	0.008448		-70	0.026807	0.038655		-70	-0.00247	0.048558		-70	0.05918	0.006144		-70	0.055542	0.009214			-70	0.020442	0.005781					-70	0.292568	0.389356		-70	0.171313	0.2144		-70	0.563345	0.468678		-70	0.018521
-60	0.006523	0		-60	-0.01592	0		-60	0.00813	0.00528		-60	0.012769	0		-60	-0.01528	0.016692		-60	0.05979	0.00768		-60	0.068359	0.022113			-60	0.007395	0.003103					-60	0.440273	0.728291		-60	0.320239	0.6048		-60	0.717764	0.664347		-60	0.074063
-50	0.010796	0.017073		-50	-0.01409	0.002648		-50	0.006299	0.002112		-50	0.01521	0.006723		-50	-0.02078	0.003035		-50	0.061621	0.012289		-50	0.07019	0.023956			-50	0.009691	0.002945					-50	0.510464	0.889356		-50	0.403247	0.8224		-50	0.853872	0.836814		-50	0.267544
-40	0.049248	0.170732		-40	-0.00615	0.014122		-40	0.022168	0.029567		-40	0.0146	0.005042		-40	-0.022	0		-40	0.11228	0.139785		-40	0.103149	0.057125			-40	0.059482	0.024026					-40	0.535488	0.946779		-40	0.439868	0.9184		-40	0.914907	0.914153		-40	0.371914
-30	0.114556	0.431707		-30	0.071971	0.127096		-30	0.110669	0.182682		-30	0.020093	0.020168		-30	-0.00979	0.030349		-30	0.229468	0.434716		-30	0.272827	0.227887			-30	0.207801	0.059909					-30	0.540371	0.957983		-30	0.457568	0.9648		-30	0.97167	0.986079		-30	0.409756
-20	0.184746	0.712195		-20	0.289256	0.441306		-20	0.278516	0.473073		-20	0.133008	0.331092		-20	0.084204	0.264036		-20	0.325903	0.677419		-20	0.526733	0.483415			-20	0.48322	0.057709					-20	0.540371	0.957983		-20	0.465503	0.9856		-20	0.97228	0.986852		-20	0.423184
-10	0.220757	0.856098		-10	0.505321	0.753751		-10	0.434155	0.742344		-10	0.262402	0.687395		-10	0.200171	0.552352		-10	0.373511	0.797235		-10	0.724487	0.682432			-10	0.724515	0.033976					-10	0.553799	0.988796		-10	0.467334	0.9904		-10	0.982656	1		-10	0.426846
0	0.24334	0.946342		0	0.621898	0.92233		0	0.514722	0.881732		0	0.346631	0.919328		0	0.297217	0.793627		0	0.412573	0.895545		0	0.870361	0.829238			0	0.88402	0.019117					0	0.536099	0.948179		0	0.463672	0.9808		0	0.95519	0.965197		0	0.426846
10	0.248833	0.968293		10	0.667674	0.988526		10	0.570264	0.977825		10	0.375928	1		10	0.352759	0.931715		10	0.427222	0.932412		10	0.961304	0.920762			10	0.959933	0.010974					10	0.545864	0.970588		10	0.469775	0.9968		10	0.946035	0.953596		10	0.415859
20	0.256768	1		20	0.675609	1		20	0.583081	1		20	0.360059	0.956303		20	0.366797	0.966616		20	0.447974	0.984639		20	1.0144	0.974201			20	0.983108	0.006273					20	0.558682	1		20	0.470996	1		20	0.930166	0.933488		20	0.409146
	V1/2	-27.7867			V1/2	-18.3092			V1/2	-18.8261			V1/2	-16.3995			V1/2	-11.7517			V1/2	-26.6439			V1/2	-18.1079		V1/2	-19.6893	1.9842							V1/2	-67.7492			V1/2	-62.2566			V1/2	-72.3685			V1/2
	k	7.79123			k	6.3797			k	7.58831			k	5.01096			k	7.29206			k	8.65824			k	9.89235		k	7.51612	0.546777							k	8.12084			k	6.55966			k	13.0027			k
Kv1.2[1.1VSD]																																				Kv1.2[1.1VSD] + Slc7a5
2019_03_22_017				2019_04_04_0018				2019_04_04_0020				2019_04_04_0026				2019_04_04_0029				2019_04_05_0019				2019_04_05_0021					AVERAGES							2019_03_22_035				2019_03_22_038				2019_03_22_026				2019_03_28_030
Voltage	Current 1-2 (tail current)	Normalized tail current		Voltage	Current 1-2 (tail current)	Normalized tail current		Voltage	Current 1-2 (tail current)	Normalized tail current		Voltage	Current 1-2 (tail current)	Normalized tail current		Voltage	Current 1-2 (tail current)	Normalized tail current		Voltage	Current 1-2 (tail current)	Normalized tail current		Voltage	Current 1-2 (tail current)	Normalized tail current			Mean voltage	Mean normalized tail current	st. error					Voltage	Current 1-2 (tail current)	Normalized tail current		Voltage	Current 1-2 (tail current)	Normalized tail current		Voltage	Current 1-2 (tail current)	Normalized tail current		Voltage	Current 1-2 (tail current)
-100	0.010352	0.109375		-100	0.021973	0.042202		-100	-0.00345	0.0325		-100	0.003402	0.188406		-100	0.008955	0.134615		-100	0.005293	0.128205		-100	0.013027	0.158537			-100	0.113406	0.020184					-100	0.018921	0.080645		-100	0.014648	0.072727		-100	0.005469	0.176471		-100	0.03439
-90	0.005469	0.046875		-90	0.012817	0.014679		-90	0.00021	0.0475		-90	0.00096	0.130435		-90	0.008955	0.134615		-90	0.013838	0.307692		-90	0.010586	0.109756			-90	0.113079	0.034112					-90	0.015869	0		-90	0.01709	0.145455		-90	0.002417	0.102941		-90	0.03561
-80	0.001807	0		-80	0.015869	0.023853		-80	-0.01139	0		-80	-0.00392	0.014493		-80	0.008345	0.125		-80	0.012007	0.269231		-80	0.009365	0.085366			-80	0.073992	0.034361					-80	0.018311	0.064516		-80	0.014038	0.054545		-80	0.010962	0.308824		-80	0.042324
-70	0.003027	0.015625		-70	0.009766	0.005505		-70	-0.00467	0.0275		-70	-0.00087	0.086957		-70	0.00041	0		-70	-0.00081	0		-70	0.008755	0.073171			-70	0.029822	0.012552					-70	0.016479	0.016129		-70	0.012207	0		-70	0.0073	0.220588		-70	0.039272
-60	0.003027	0.015625		-60	0.007935	0		-60	0.007534	0.0775		-60	-0.00453	0		-60	0.001631	0.019231		-60	0.004683	0.115385		-60	0.009976	0.097561			-60	0.046472	0.017104					-60	0.021973	0.16129		-60	0.012817	0.018182		-60	-0.00186	0		-60	0.044155
-50	0.0073	0.070313		-50	0.016479	0.025688		-50	0.038662	0.205		-50	-0.00331	0.028986		-50	0.007124	0.105769		-50	0.002852	0.076923		-50	0.005093	0			-50	0.07324	0.023915					-50	0.025635	0.258065		-50	0.01709	0.145455		-50	0.023779	0.617647		-50	0.066128
-40	0.038428	0.46875		-40	0.071411	0.190826		-40	0.110073	0.4975		-40	0.013778	0.434783		-40	0.027876	0.432692		-40	0.016279	0.358974		-40	0.013638	0.170732			-40	0.364894	0.046486					-40	0.03479	0.5		-40	0.022583	0.309091		-40	0.032324	0.823529		-40	0.075283
-30	0.064673	0.804687		-30	0.181274	0.521101		-30	0.175991	0.7675		-30	0.026595	0.73913		-30	0.049238	0.769231		-30	0.029707	0.641026		-30	0.024624	0.390244			-30	0.661846	0.054037					-30	0.045776	0.790323		-30	0.039063	0.8		-30	0.028662	0.735294		-30	0.088101
-20	0.078711	0.984375		-20	0.293579	0.858716		-20	0.214443	0.925		-20	0.03575	0.956522		-20	0.063887	1		-20	0.042524	0.910256		-20	0.042324	0.743902			-20	0.911253	0.030715					-20	0.05188	0.951613		-20	0.045776	1		-20	0.039038	0.985294		-20	0.082607
-10	0.079932	1		-10	0.331421	0.972477		-10	0.232754	1		-10	0.037581	1		-10	0.057783	0.903846		-10	0.042524	0.910256		-10	0.055142	1			-10	0.969511	0.015353					-10	0.053711	1		-10	0.043945	0.945455		-10	0.035376	0.897059		-10	0.080166
0	0.071387	0.890625		0	0.340576	1		0	0.210781	0.91		0	0.032088	0.869565		0	0.05168	0.807692		0	0.046797	1		0	0.050869	0.914634			0	0.913217	0.02417					0	0.048218	0.854839		0	0.040894	0.854545		0	0.039648	1		0	0.078945
10	0.07688	0.960937		10	0.307007	0.899083		10	0.20834	0.9		10	0.025985	0.724638		10	0.051069	0.798077		10	0.042524	0.910256		10	0.049648	0.890244			10	0.869034	0.027973					10	0.05249	0.967742		10	0.041504	0.872727		10	0.034766	0.882353		10	0.074063
20	0.066504	0.828125		20	0.290527	0.849541		20	0.215664	0.93		20	0.024764			20	0.039473			20	0.041914	0.897436		20	0.046597	0.829268			20	0.866874	0.018039					20	0.041504			20	0.041504	0.872727		20	0.031714	0.808824		20	0.0704
	V1/2	-41.0201			V1/2	-30.5782			V1/2	-41.8069			V1/2	-38.3269			V1/2	-38.7104			V1/2	-37.5696			V1/2	-28.5546				V1/2	-36.6524						V1/2	-41.1077			V1/2	-36.7319			V1/2	-50.4832			V1/2
	k	3.41245			k	6.14298			k	6.48292			k	5.03437			k	5.51377			k	6.03367			k	6.15516				k	5.53933						k	9.39007			k	5.32066			k	12.9847			k
[truncated: 22 more columns]
