# Supplementary material for: Control of Slc7a5 sensitivity by the voltage-sensing domain of Kv1 channels
Source: eLife. 2020 Nov 9;9:e54916. doi: 10.7554/eLife.54916 (PMC7690953; doi:10.7554/eLife.54916)
Supplement: Figure 8—source data 1. [file elife-54916-fig8-data1.xlsx]

## Sheet: Main Figure
Kv1.2	V1/2		Kv1.2 + Slc7a5	V1/2
2017_03_24_0079_leak80.abf	-8.72874		2017_03_24_0052_leak400.abf	-56.7028
2017_03_24_0084_leak150.abf	-11.3949		2017_03_24_0067_leak500.abf	-57.4866
2017_03_28_0063_leak120.abf	-11.6711		2017_03_24_0072_leak200.abf	-58.6176
2017_03_28_0068_leak60.abf	-10.0914		2017_03_28_0078_leak250.abf	-63.5409
2017_03_28_0074_leak180.abf	-9.64864		2017_03_28_0083.abf	-52.4946
2017_03_30_0040.abf	-11.7892		2017_03_30_0002_leak150.abf	-54.5727
2017_03_30_0047_leak220.abf	-14.79		2017_03_30_0006_leak400.abf	-60.0123
2017_03_31_0068_leak300.abf	-13.1215		2017_03_30_0012_leak150.abf	-60.8465
2017_03_31_0073.abf	-10.2269		2017_03_30_0022_leak400.abf	-60.4829
2017_04_07_0021.abf	-3.14427		2017_03_30_0025_leak50.abf	-56.3647
			2017_03_31_0005_leak200.abf	-55.0314
			2017_03_31_0015_leak300.abf	-62.1151
			2017_03_31_0026_leak500.abf	-58.2949
			2017_03_31_0034_leak300.abf	-60.0456
			2017_03_31_0044_leak400.abf	-60.5372
			2017_04_14_0013_leak500.abf	-56.2632
Kv1.5	V1/2		Kv1.5 + Slc7a5	V1/2
2017_04_26_0006_leak50.abf	1.91233		2017_04_26_0143_leak120.abf	0.251841
2017_04_26_0012_leak110.abf	-6.79951		2017_04_26_0150_leak470.abf	-4.02668
2017_04_26_0018_leak160.abf	-1.36958		2017_04_26_0157_leak180.abf	-13.379
2017_04_26_0024_leak300.abf	-3.79985		2017_04_26_0166_leak70.abf	-4.28117
2017_04_26_0031_leak330.abf	-3.24918		2017_04_26_0173_leak250.abf	3.83821
2017_04_26_0037_leak330.abf	-3.63765		2017_04_26_0179_leak360.abf	-4.67847
2017_04_26_0294_leak350.abf	-4.39456		2017_04_26_0186_leak100.abf	-8.196
2017_04_26_0300_leak100.abf	-4.41171		2017_04_26_0255_leak80.abf	-6.67054
2017_04_26_0312_leak300.abf	-3.63728		2017_04_26_0263_leak40.abf	-2.0332
2017_04_26_0318_leak330.abf	-2.65838		2017_04_26_0274_leak330.abf	-10.4641
			2017_04_26_0280_leak320.abf	-7.19313
			2017_04_26_0286_leak200.abf	-4.02858
Kv1.5-Kv1.2 S1 chimera	V1/2		Kv1.5-Kv1.2 S1 chimera + Slc7a5	V1/2
2018_08_29_0010	-17.9966		2018_09_06_0092	-16.5843
2018_08_29_0017	-13.7078		2018_09_06_0077	-15.6876
2018_08_29_0025	-18.5656		2018_09_06_0086	-12.7555
2018_08_29_0004	-20.7291		2018_09_06_0098	-11.597
			2018_09_06_0104	-13.0353
Kv1.5-Kv1.2 S3 chimera	V1/2		Kv1.5-Kv1.2 S3 chimera + Slc7a5	V1/2
2018_09_05_019	-10.0746		2018_10_04_0084	-35.279
2018_09_05_027	-10.1115		2018_11_21_0048	-31.6095
2018_09_05_039	-16.7068		2018_11_21_0049	-34.1128
2018_09_05_045	-15.564		2018_11_21_0041	-64.4907
			2018_11_29_0022	-59.2829
			2018_11_29_0023	-63.8683
Kv1.5-Kv1.2 Pore chimera	V1/2		Kv1.5-Kv1.2 Pore chimera + Slc7a5	V1/2
2018_08_29_0068	-20.725		2018_09_20_0054	-58.4255
2018_08_29_0074	-18.2389		2018_11_21_0065	-50.9197
2018_08_29_0081	-25.469		2018_11_21_0077	-71.8725
2018_08_29_0087	-14.1541		2018_11_21_0083	-73.8088
			2018_11_29_0031	-29.3377
C-term chimera	V1/2		C-term chimera + Slc7a5	V1/2
2018_08_29_0039	-19.9748		2018_09_20_0031	-53.2544
2018_08_29_0045	-17.3979		2018_09_27_0048	-46.5122
2018_08_29_0056	-23.1794		2018_09_27_0058	-57.186
2018_08_29_0062	-17.7199

## Sheet: Supplement 1
Kv1.2[Kv1.5 S1]																																					Kv1.2[Kv1.5 S1] + Slc7a5
		2017_04_05_0003_leak80.abf				2017_04_05_0007_leak100.abf				2017_04_05_0013_leak190.abf				2017_04_05_0017.abf																									2017_04_05_0053_leak200.abf				2017_04_05_0057_leak120.abf				2017_04_05_0061_leak500.abf
	Voltage (mV)	Tail Current Magnitude (pA)	Normalized Tail Current		Voltage (mV)	Tail Current Magnitude (pA)	Normalized Tail Current		Voltage (mV)	Tail Current Magnitude (pA)	Normalized Tail Current		Voltage (mV)	Tail Current Magnitude (pA)	Normalized Tail Current															Voltage (mV)	AVG	SD						Voltage (mV)	Tail Current Magnitude (pA)	Normalized Tail Current		Voltage (mV)	Tail Current Magnitude (pA)	Normalized Tail Current		Voltage (mV)	Tail Current Magnitude (pA)	Normalized Tail Current
	-130	14.624	0.00156		-130	7.41699	0.003449		-130	109.477	0.10846		-130	23.8037	0.008546															-130	0.030504	0.052055						-130	14.2236	0.00141		-130	35.0586	0.001046		-130	67.6025	0.000978
	-120	20.7275	0.003509		-120	8.63769	0.003725		-120	97.2701	0.093999		-120	-10.9863	0															-120	0.025308	0.045825						-120	14.834	0.001587		-120	33.2275	0.000418		-120	65.7715	0
	-110	23.7793	0.004484		-110	14.7412	0.005104		-110	94.8287	0.091106		-110	7.93457	0.004648															-110	0.026336	0.043181						-110	9.34082	0		-110	38.7207	0.002302		-110	71.2647	0.002935
	-100	21.3379	0.003704		-100	11.6895	0.004414		-100	97.8804	0.094722		-100	4.27246	0.003748															-100	0.026647	0.045384						-100	19.7168	0.002997		-100	43.6035	0.003976		-100	80.4199	0.007828
	-90	19.5068	0.00312		-90	21.4551	0.006622		-90	72.2456	0.064353		-90	4.88281	0.003898															-90	0.019498	0.029941						-90	20.3271	0.003173		-90	32.0068	0		-90	75.5371	0.005219
	-80	11.5723	0.000585		-80	0.703123	0.001931		-80	53.9351	0.042661		-80	7.93457	0.004648															-80	0.012456	0.020207						-80	15.4443	0.001763		-80	32.0068	0		-80	80.4199	0.007828
	-70	9.74121	0		-70	0.703123	0.001931		-70	49.6626	0.037599		-70	20.1416	0.007646															-70	0.011794	0.017507						-70	25.21	0.004584		-70	33.8379	0.000628		-70	79.8096	0.007502
	-60	25	0.004874		-60	-7.8418	0		-60	39.897	0.02603		-60	-8.54492	0.0006															-60	0.007876	0.012296						-60	33.1445	0.006876		-60	61.9141	0.010253		-60	116.431	0.027071
	-50	17.0654	0.00234		-50	-6.01074	0.000414		-50	29.521	0.013738		-50	-4.27246	0.001649															-50	0.004535	0.006187						-50	70.9863	0.017807		-50	91.2109	0.020297		-50	211.035	0.077626
	-40	21.9482	0.003899		-40	0.703123	0.001931		-40	17.9244	0		-40	-3.66211	0.001799															-40	0.001907	0.001594						-40	153.384	0.041608		-40	166.894	0.046244		-40	336.157	0.144488
	-30	62.8418	0.016962		-30	133.76	0.032004		-30	49.6626	0.037599		-30	56.7627	0.016642															-30	0.025802	0.010641						-30	388.369	0.109485		-30	477.563	0.152752		-30	591.284	0.280822
	-20	546.851	0.171573		-20	1092.01	0.248586		-20	304.79	0.339841		-20	738.525	0.184108															-20	0.236027	0.076995						-20	1156.19	0.331276		-20	1196.56	0.399247		-20	1066.75	0.534899
	-10	1515.48	0.48099		-10	2505.59	0.568078		-10	656.352	0.756327		-10	1934.81	0.477961															-10	0.570839	0.130528						-10	2310.37	0.664669		-10	2030.91	0.68529		-10	1513.53	0.773646
	0	2218.6	0.705596		0	3396.09	0.769347		0	783.305	0.906725		0	2873.53	0.708546															0	0.772553	0.09415						0	2978.09	0.857546		0	2475.24	0.837623		0	1679.54	0.862361
	10	2586.65	0.823162		10	3838.59	0.869361		10	794.902	0.920463		10	3344.12	0.824138															10	0.859281	0.046132						10	3208.19	0.924013		10	2625.39	0.889098		10	1728.37	0.888454
	20	2794.78	0.889647		20	4036.96	0.914195		20	826.03	0.957339		20	3676.15	0.905697															20	0.91672	0.028929						20	3296.69	0.949577		20	2709.01	0.917765		20	1722.88	0.885519
	30	2909.52	0.926301		30	4110.2	0.930749		30	835.185	0.968185		30	3807.98	0.938081															30	0.940829	0.018873						30	3329.04	0.958921		30	2729.76	0.92488		30	1769.26	0.910307
	40	3004.13	0.956522		40	4208.47	0.952959		40	859.599	0.997108		40	3907.47	0.962519															40	0.967277	0.020275						40	3402.9	0.980254		40	2804.83	0.950617		40	1768.04	0.909654
	50	3035.86	0.96666		50	4276.22	0.968271		50	842.509	0.976862		50	3925.78	0.967016															50	0.969703	0.004823						50	3435.85	0.989774		50	2810.94	0.95271		50	1797.95	0.925636
	60	3100.56	0.987327		60	4364.72	0.988274		60	839.458	0.973247		60	3984.99	0.981559															60	0.982602	0.006907						60	3471.26	1		60	2887.23	0.978866		60	1827.25	0.941292
	70	3140.23	1		70	4378.15	0.991309		70	862.041	1		70	4060.06	1															70	0.997827	0.004345						70	3437.07	0.990127		70	2901.27	0.983679		70	1847.39	0.952055
	80				80	4404.39	0.997241		80	858.379	0.995662		80	4035.64	0.994003															80								80				80	2948.88	1		80	1872.41	0.965427
	90				90	4416.6	1		90	849.223	0.984816		90	3997.8	0.984708															90								90				90				90	1906.59	0.983692
	100				100	4354.95	0.986067		100				100	3988.65	0.982459															100								100				100				100	1937.11	1
	110				110				110				110	3930.66	0.968216															110								110				110				110	1924.9	0.993477
									120				120																	120																120
									130				130																	130																130
		z->	2.70425			z->	2.94348			z->	4.50059			z->	2.7396															z->	3.22198	0.858902							z->	3.18683			z->	2.67715			z->	2.17288
		V1/2->	-7.11054			V1/2->	-10.5245			V1/2->	-15.9322			V1/2->	-7.31442															V1/2->	-10.2204	4.11637							V1/2->	-14.603			V1/2->	-15.7102			V1/2->	-20.8299
Kv1.2[Kv1.5 S1-2 L]																																					Kv1.2[Kv1.5 S1-2 L] + Slc7a5
		2017_03_24_0089.abf				2017_03_24_0093_leak160.abf				2017_03_24_0096_leak120.abf				2017_03_24_0116_leak120.abf				2017_03_24_0122_leak500.abf						2017_03_24_0126_leak90.abf															2017_03_24_0099_leak50.abf				2017_03_24_0104_leak200.abf				2017_03_24_0135_leak300.abf
	Voltage (mV)	Tail Current Magnitude (pA)	Normalized Tail Current		Voltage (mV)	Tail Current Magnitude (pA)	Normalized Tail Current		Voltage (mV)	Tail Current Magnitude (pA)	Normalized Tail Current		Voltage (mV)	Tail Current Magnitude (pA)	Normalized Tail Current		Voltage (mV)	Tail Current Magnitude (pA)	Normalized Tail Current	Boltzmann Model Fit	Squared Difference		Voltage (mV)	Tail Current Magnitude (pA)	Normalized Tail Current	Boltzmann Model Fit	Squared Difference			Voltage (mV)	AVG	SD						Voltage (mV)	Tail Current Magnitude (pA)	Normalized Tail Current		Voltage (mV)	Tail Current Magnitude (pA)	Normalized Tail Current		Voltage (mV)	Tail Current Magnitude (pA)	Normalized Tail Current
	-130	15.2588	0.001452		-130	52.4414	0.00948		-130	30.7861	0.004017		-130	18.5791	0.002841		-130	18.1641	0	5.29e-06	2.79e-11		-130	18.1175	0.008708	0.000149	7.33e-05			-130	0.004416	0.003873						-130	19.2725	0		-130	227.847	0		-130	75.1004	0.002751
	-120	22.583	0.002904		-120	48.169	0.008005		-120	27.7344	0.003408		-120	29.5654	0.00749		-120	39.5264	0.00443	1.43e-05	1.95e-05		-120	16.8968	0.007983	0.000282	5.93e-05			-120	0.005703	0.002384						-120	19.2725	0		-120	310.244	0.01226		-120	72.659	0
	-110	7.93457	0		-110	48.169	0.008005		-110	24.0723	0.002678		-110	22.2412	0.00439		-110	48.6816	0.006329	3.85e-05	3.96e-05		-110	23.0003	0.011611	0.000534	0.000123			-110	0.005502	0.004093						-110	30.8691	0.023691		-110	394.473	0.024793		-110	83.6453	0.01238
	-100	18.9209	0.002178		-100	41.4551	0.005688		-100	25.293	0.002921		-100	22.8516	0.004649		-100	41.3574	0.00481	0.000104	2.21e-05		-100	8.96218	0.003266	0.001012	5.08e-06			-100	0.003919	0.001335						-100	41.2451	0.044888		-100	493.96	0.039597		-100	97.073	0.02751
	-90	13.4277	0.001089		-90	36.5723	0.004003		-90	10.6445	0		-90	27.124	0.006457		-90	32.2022	0.002911	0.00028	6.92e-06		-90	20.5589	0.01016	0.001915	6.8e-05			-90	0.004103	0.00373						-90	47.3486	0.057357		-90	606.875	0.056398		-90	81.2039	0.009629
	-80	14.0381	0.00121		-80	24.9756	0		-80	17.3584	0.001339		-80	14.917	0.001291		-80	52.9541	0.007215	0.000755	4.17e-05		-80	11.4036	0.004717	0.003622	1.2e-06			-80	0.002629	0.002748						-80	67.4902	0.098504		-80	788.76	0.083462		-80	106.839	0.038514
	-70	15.2588	0.001452		-70	35.9619	0.003792		-70	21.6309	0.002191		-70	14.3066	0.001033		-70	45.0195	0.00557	0.002034	1.25e-05		-70	14.4553	0.006531	0.006839	9.48e-08			-70	0.003428	0.002259						-70	88.8525	0.142145		-70	1053.65	0.122877		-70	208.157	0.152682
	-60	18.3105	0.002057		-60	29.8584	0.001685		-60	18.5791	0.001582		-60	18.5791	0.002841		-60	47.4609	0.006076	0.005468	3.69e-07		-60	10.7932	0.004354	0.012877	7.26e-05			-60	0.003099	0.001783						-60	177.353	0.322943		-60	1761.66	0.228226		-60	398.587	0.367263
	-50	12.207	0.000847		-50	26.1963	0.000421		-50	28.3447	0.00353		-50	11.8652	0		-50	37.085	0.003924	0.014616	0.000114		-50	14.4553	0.006531	0.024117	0.000309			-50	0.002542	0.002555						-50	319.565	0.613466		-50	3360.78	0.46617		-50	673.245	0.676754
	-40	17.0898	0.001815		-40	29.248	0.001475		-40	27.124	0.003287		-40	27.7344	0.006715		-40	70.0439	0.010759	0.038477	0.000768		-40	3.46902	0	0.044722	0.002			-40	0.004008	0.004018						-40	424.546	0.82793		-40	4904.97	0.69594		-40	844.754	0.870014
	-30	164.185	0.030978		-30	74.4141	0.017063		-30	104.639	0.018746		-30	86.9385	0.031767		-30	222.632	0.042405	0.097439	0.003029		-30	36.428	0.019594	0.081463	0.003828			-30	0.026759	0.009972						-30	489.243	0.9601		-30	5960.88	0.853056		-30	913.723	0.94773
	-20	1166.99	0.229792		-20	367.383	0.11818		-20	688.745	0.13524		-20	401.88	0.165031		-20	1147.92	0.234304	0.225557	7.65e-05		-20	188.405	0.109942	0.143844	0.001149			-20	0.165415	0.054971						-20	481.309	0.94389		-20	6577.33	0.944782		-20	929.592	0.965612
	-10	2570.8	0.508107		-10	1052.81	0.35475		-10	1936.3	0.384054		-10	944.482	0.394628		-10	2317.36	0.476835	0.440009	0.001356		-10	455.129	0.268505	0.241435	0.000733			-10	0.397813	0.086237						-10	497.178	0.976309		-10	6892.27	0.991645		-10	960.11	1
	0	3643.19	0.720716		0	1775.46	0.604171		0	3100.24	0.61619		0	1443.14	0.60563		0	3309.79	0.682658	0.679466	1.02e-05		0	707.815	0.418723	0.376149	0.001813			0	0.608015	0.104108						0	508.774	1		0	6948.43	1		0	944.851	0.982806
	10	4381.1	0.867014		10	2261.91	0.772067		10	3906.52	0.776993		10	1839.26	0.773244		10	3975.68	0.820759	0.851164	0.000924		10	956.838	0.566763	0.533194	0.001127			10	0.762807	0.103001						10	494.736	0.971322		10	6888	0.991009		10	924.71	0.96011
	20	4797.36	0.94954		20	2559.16	0.874658		20	4435.69	0.882532		20	2087.06	0.878099		20	4439.55	0.916962	0.939129	0.000491		20	1128.96	0.669086	0.683926	0.00022			20	0.861813	0.098733						20	508.164	0.998753		20	6742.74	0.969394		20	936.917	0.973865
	30	5038.45	0.997338		30	2673.9	0.914262		30	4766.5	0.948509		30	2206.08	0.928461		30	4692.24	0.969367	0.976538	5.14e-05		30	1283.38	0.760885	0.803888	0.001849			30	0.919804	0.08325						30	495.957	0.973815		30	6566.96	0.943239		30	933.865	0.970426
	40	5051.88	1		40	2792.31	0.95513		40	4902.61	0.975654		40	2331.2	0.981405		40	4821.63	0.996203	0.991173	2.53e-05		40	1479.3	0.877358	0.885915	7.32e-05			40	0.964292	0.045512						40	486.191	0.953865		40				40	909.451	0.942916
	50	4970.09	0.983785		50	2851.51	0.975564		50	5024.68	1		50	2375.15	1		50	4839.94	1	0.99671	1.08e-05		50	1525.69	0.904935	0.936349	0.000987			50	0.977381	0.036953						50	483.14	0.947631		50				50	910.061	0.943604
	60	4788.21	0.947725		60	2869.21	0.981673		60	5006.98	0.99647		60	2365.99	0.996126		60	4749.61	0.981266	0.998778	0.000307		60	1659.35	0.984398	0.965359	0.000362			60	0.981276	0.017815						60	456.284	0.892768		60				60	868.557	0.896836
	70	4589.23	0.908277		70	2900.34	0.992416		70	4928.25	0.980767		70	2322.05	0.977531		70	4643.41	0.959241	0.999547	0.001625		70	1644.7	0.975689	0.98141	3.27e-05			70	0.965653	0.030065						70	471.543	0.92394		70				70	880.154	0.909904
	80	4396.36	0.870039		80	2908.28	0.995155		80	4817.16	0.958612		80	2267.72	0.954545		80	4440.77	0.917215	0.999832	0.006826		80	1685.6	1	0.9901	9.8e-05			80								80	475.205	0.931421		80				80	868.557	0.896836
	90	4240.72	0.839182		90	2922.31	1		90	4709.13	0.937066		90	2204.25	0.927686		90	4263.77	0.880506	0.999938	0.014264		90							90								90	467.271	0.915212		90				90	875.882	0.905089
	100	4042.36	0.799855		100				100				100				100	4078.22	0.842025	0.999977	0.024949		100							100								100	481.919	0.945137		100				100	859.402	0.88652
	110	3875.12	0.766699		110				110				110				110	3924.41	0.810127	0.999991	0.036049		110							110								110	476.426	0.933915		110				110	860.623	0.887895
																							120							120
																							130							130
		z->	2.90311			z->	2.53498			z->	2.56516			z->	2.40284			z->	2.53911					z->	1.63459					z->	2.42996	0.423897							z->	2.73346			z->	2.39456			z->	3.10747
		V1/2->	-8.95767			V1/2->	-2.79769			V1/2->	-3.71175			V1/2->	-3.83531			V1/2->	-7.57038					V1/2->	7.91872					V1/2->	-3.15901	5.94465							V1/2->	-54.0967			V1/2->	-48.5907			V1/2->	-55.7127
Kv1.2[Kv1.5 S2]																																					Kv1.2[Kv1.5 S2] + Slc7a5
		2017_04_05_0021.abf				2017_04_05_0025_leak80.abf				2017_04_05_0032_leak100.abf				2017_04_05_0036.abf																									2017_04_05_0085_leak380.abf				2017_04_05_0112_leak150.abf				2017_04_05_0116_leak400.abf
	Voltage (mV)	Tail Current Magnitude (pA)	Normalized Tail Current		Voltage (mV)	Tail Current Magnitude (pA)	Normalized Tail Current		Voltage (mV)	Tail Current Magnitude (pA)	Normalized Tail Current		Voltage (mV)	Tail Current Magnitude (pA)	Normalized Tail Current															Voltage (mV)	AVG	SD						Voltage (mV)	Tail Current Magnitude (pA)	Normalized Tail Current		Voltage (mV)	Tail Current Magnitude (pA)	Normalized Tail Current		Voltage (mV)	Tail Current Magnitude (pA)	Normalized Tail Current
	-130	37.2315	0.028752		-130	18.8965	0.004495		-130	23.8965	0.008308		-130	8.54492	0.00988															-130	0.012859	0.010834						-130	18.3387	0.007782		-130	85.3282	0.007567		-130	169.439	0
	-120	41.5039	0.031206		-120	16.4551	0.003713		-120	11.6895	0.001662		-120	2.44141	0.00798															-120	0.01114	0.013634						-120	25.6629	0.017121		-120	83.4972	0.005821		-120	224.37	0.0322
	-110	25.6348	0.02209		-110	17.0654	0.003909		-110	13.5205	0.002659		-110	1.2207	0.0076															-110	0.009064	0.008933						-110	25.6629	0.017121		-110	77.3937	0		-110	243.901	0.043649
	-100	29.2969	0.024194		-100	13.4033	0.002736		-100	22.6758	0.007644		-100	1.2207	0.0076															-100	0.010543	0.009387						-100	24.4422	0.015564		-100	96.9249	0.018626		-100	251.836	0.048301
	-90	25.0244	0.021739		-90	7.2998	0.000782		-90	11.6895	0.001662		-90	1.2207	0.0076															-90	0.007946	0.009681						-90	12.2352	0		-90	106.691	0.027939		-90	272.588	0.060465
	-80	15.8691	0.01648		-80	5.46875	0.000195		-80	19.0137	0.00565		-80	-5.49316	0.00551															-80	0.006959	0.006836						-80	35.4286	0.029572		-80	142.091	0.0617		-80	364.141	0.114132
	-70	15.2588	0.016129		-70	12.1826	0.002345		-70	17.1826	0.004653		-70	-9.15527	0.00437															-70	0.006874	0.006255						-70	12.2352	0		-70	241.578	0.156577		-70	546.636	0.221109
	-60	0	0.007363		-60	9.74121	0.001563		-60	20.8447	0.006647		-60	-23.1934	0															-60	0.003893	0.003661						-60	47.6356	0.045136		-60	383.18	0.291618		-60	831.67	0.388193
	-50	-12.8174	0		-50	4.8584	0		-50	8.63769	0		-50	-20.1416	0.00095															-50	0.000238	0.000475						-50	50.6874	0.049027		-50	583.375	0.482538		-50	1156.38	0.578533
	-40	-12.207	0.000351		-40	8.52051	0.001173		-40	25.7275	0.009305		-40	-20.752	0.00076															-40	0.002897	0.004285						-40	96.4637	0.107393		-40	749.391	0.640861		-40	1351.08	0.692665
	-30	25.6348	0.02209		-30	92.749	0.028141		-30	85.542	0.041874		-30	108.643	0.041041															-30	0.033287	0.009759						-30	144.681	0.168872		-30	884.278	0.769499		-30	1489.63	0.773882
	-20	283.203	0.170056		-20	680.518	0.216338		-20	479.829	0.256564		-20	631.714	0.203876															-20	0.211708	0.035729						-20	316.19	0.387549		-20	984.986	0.865541		-20	1583.01	0.828623
	-10	838.013	0.48878		-10	1577.12	0.50342		-10	1023.04	0.552343		-10	1390.99	0.440243															-10	0.496196	0.046153						-10	532.255	0.663035		-10	1058.23	0.93539		-10	1650.76	0.868336
	0	1229.25	0.713534		0	2280.25	0.728552		0	1457	0.788634		0	2044.07	0.643549															0	0.718567	0.059616						0	679.96	0.851362		0	1095.46	0.970896		0	1684.33	0.888014
	10	1439.82	0.834502		10	2658.67	0.849717		10	1610.81	0.872383		10	2426.15	0.762493															10	0.829774	0.047477						10	744.047	0.933074		10	1116.21	0.990687		10	1702.64	0.898748
	20	1533.81	0.888499		20	2868.63	0.916944		20	1743.26	0.9445		20	2672.12	0.839065															20	0.897252	0.045028						20	782.499	0.982101		20	1125.98	1		20	1740.48	0.92093
	30	1583.25	0.9169		30	2973	0.950362		30	1787.2	0.968428		30	2824.1	0.886377															30	0.930517	0.036354						30	784.33	0.984436		30	1120.48	0.994761		30	1722.78	0.910555
	40	1638.79	0.948808		40	3031.59	0.969123		40	1826.88	0.99003		40	2942.51	0.923238															40	0.957799	0.028533						40	771.513	0.968093		40	1119.26	0.993597		40	1768.56	0.937388
	50	1670.53	0.967041		50	3107.28	0.993355		50	1825.04	0.989033		50	3032.23	0.951169															50	0.975149	0.019707						50	792.875	0.995331		50	1118.04	0.992433		50	1779.55	0.943828
	60	1681.52	0.973352		60	3108.5	0.993746		60	1840.91	0.997674		60	3092.04	0.969789															60	0.98364	0.014104						60	762.357	0.95642		60	1097.9	0.973225		60	1828.37	0.972451
	70	1682.74	0.974053		70	3128.03	1		70	1845.19	1		70	3189.09	1															70	0.993513	0.012973						70	775.785	0.973541		70	1099.12	0.974389		70	1835.7	0.976744
	80	1727.9	1		80	3091.41	0.988274		80	1840.3	0.997341		80	3166.5	0.99297															80								80	796.537	1		80	1077.15	0.953434		80	1838.75	0.978533
	90	1717.53	0.994039		90	3045.63	0.973617		90	1803.07	0.977069		90	3141.48	0.98518															90								90	784.94	0.985214		90	1057.01	0.934226		90	1871.71	0.997853
	100				100				100	1826.88	0.99003		100	3121.34	0.978909															100								100	768.461	0.964202		100	1068.61	0.945285		100	1857.06	0.989267
	110				110				110	1816.5	0.98438		110	3094.48	0.970549															110								110	779.447	0.97821		110	1053.35	0.930733		110	1875.37	1
	120				170																									120								120				170
	130				180																									130								130				180
		z->	2.74465			z->	2.816			z->	3.04497			z->	2.10582															z->	2.67786	0.402301							z->	2.64603			z->	1.87161			z->	1.40911
		V1/2->	-7.42149			V1/2->	-8.57305			V1/2->	-10.781			V1/2->	-4.64697															V1/2->	-7.85564	2.55322							V1/2->	-16.0911			V1/2->	-47.6477			V1/2->	-50.892
Kv1.2[Kv1.5 S2-3 L]																																					Kv1.2[Kv1.5 S2-3 L] + Slc7a5
		2017_04_05_0039_leak100.abf				2017_04_05_0041.abf				2017_04_05_0045_leak80.abf				2017_04_05_0047_leak180.abf				2017_04_05_0049_leak150.abf																					2017_04_05_0090_leak180.abf				2017_04_05_0094_leak500.abf				2017_04_05_0098_leak400.abf
	Voltage (mV)	Tail Current Magnitude (pA)	Normalized Tail Current		Voltage (mV)	Tail Current Magnitude (pA)	Normalized Tail Current		Voltage (mV)	Tail Current Magnitude (pA)	Normalized Tail Current		Voltage (mV)	Tail Current Magnitude (pA)	Normalized Tail Current		Voltage (mV)	Tail Current Magnitude (pA)	Normalized Tail Current	Boltzmann Model Fit	Squared Difference									Voltage (mV)	AVG	SD						Voltage (mV)	Tail Current Magnitude (pA)	Normalized Tail Current		Voltage (mV)	Tail Current Magnitude (pA)	Normalized Tail Current		Voltage (mV)	Tail Current Magnitude (pA)	Normalized Tail Current
	-130	32.4414	0.025015		-130	2.44141	0.003081		-130	19.5068	0.008978		-130	33.787	0.005273		-130	29.7862	0.012048	1.22e-07	0.000145									-130	0.010879	0.008618						-130	31.0791	0.00949		-130	109.717	0		-130	78.4961	0
	-120	25.7275	0.018304		-120	10.376	0.007532		-120	16.4551	0.006484		-120	36.2285	0.006232		-120	37.7208	0.019507	4.62e-07	0.00038									-120	0.011612	0.006689						-120	26.1963	0		-120	150.61	0.008906		-120	82.7686	0.003477
	-110	27.5586	0.020134		-110	6.10352	0.005135		-110	15.8447	0.005985		-110	25.8525	0.002157		-110	34.6691	0.016638	1.75e-06	0.000277									-110	0.01001	0.007875						-110	29.248	0.005931		-110	194.556	0.018477		-110	98.6377	0.016393
	-100	24.5068	0.017084		-100	3.05176	0.003423		-100	17.6758	0.007481		-100	31.3456	0.004314		-100	33.4484	0.015491	6.63e-06	0.00024									-100	0.009559	0.00635						-100	33.5205	0.014235		-100	266.577	0.034162		-100	102.91	0.019871
	-90	28.7793	0.021354		-90	5.49316	0.004793		-90	21.3379	0.010474		-90	22.8007	0.000959		-90	30.3966	0.012622	2.51e-05	0.000159									-90	0.01004	0.007824						-90	35.9619	0.01898		-90	301.367	0.041739		-90	107.183	0.023348
	-80	31.8311	0.024405		-80	-3.05176	0		-80	12.1826	0.002993		-80	20.3593	0		-80	27.3449	0.009753	9.5e-05	9.33e-05									-80	0.00743	0.010291						-80	54.8828	0.055753		-80	441.138	0.072179		-80	124.272	0.037258
	-70	36.7139	0.029286		-70	3.66211	0.003766		-70	14.624	0.004988		-70	27.0732	0.002637		-70	24.2931	0.006885	0.00036	4.26e-05									-70	0.009512	0.011166						-70	78.0762	0.10083		-70	731.665	0.135451		-70	171.88	0.076006
	-60	15.9619	0.008542		-60	7.32422	0.00582		-60	8.52051	0		-60	28.2939	0.003116		-60	26.7345	0.00918	0.00136	6.11e-05									-60	0.005331	0.00383						-60	153.76	0.247924		-60	1677.1	0.341353		-60	359.868	0.229011
	-50	21.4551	0.014033		-50	4.27246	0.004108		-50	13.4033	0.00399		-50	28.2939	0.003116		-50	16.9689	0	0.005131	2.63e-05									-50	0.005049	0.00529						-50	320.386	0.571767		-50	3169.41	0.666357		-50	738.896	0.537506
	-40	7.41699	0		-40	4.88281	0.004451		-40	18.2861	0.00798		-40	24.0214	0.001438		-40	18.1896	0.001147	0.019152	0.000324									-40	0.003003	0.003232						-40	438.184	0.800712		-40	4242.41	0.90004		-40	1044.07	0.785892
	-30	58.0762	0.050641		-30	61.6455	0.036289		-30	48.8037	0.032918		-30	107.64	0.034276		-30	50.5382	0.031555	0.068839	0.00139									-30	0.037136	0.007749						-30	513.257	0.946619		-30	4601.9	0.978333		-30	1185.67	0.901143
	-20	238.13	0.230628		-20	380.249	0.214995		-20	269.751	0.213466		-20	552.586	0.209012		-20	259.278	0.227768	0.218694	8.23e-05									-20	0.219174	0.009465						-20	530.957	0.98102		-20	4701.39	1		-20	1260.75	0.962245
	-10	591.523	0.583893		-10	903.931	0.50873		-10	690.283	0.557107		-10	1093.97	0.42162		-10	582.765	0.531842	0.514513	0.0003									-10	0.520638	0.062054						-10	535.23	0.989324		-10	4629.37	0.984315		-10	1296.76	0.991555
	0	866.792	0.85906		0	1373.29	0.771996		0	980.2	0.794015		0	1596.29	0.618888		0	853.761	0.786575	0.800502	0.000194									0	0.766107	0.088806						0	521.802	0.963227		0	4537.21	0.964243		0	1307.13	1
	10	994.356	0.986577		10	1605.84	0.902431		10	1154.15	0.93616		10	2033.3	0.790508		10	999.635	0.923695	0.938243	0.000212									10	0.907874	0.072541						10	534.619	0.988138		10	4353.49	0.924232		10	1286.38	0.98311
	20	1002.29	0.994509		20	1693.73	0.951729		20	1204.2	0.977057		20	2280.49	0.887584		20	1066.77	0.986804	0.982912	1.51e-05									20	0.959537	0.043335						20	540.723	1		20	4205.79	0.892064		20	1257.69	0.959762
	30	983.98	0.976205		30	1724.85	0.969189		30	1232.28	1		30	2402.56	0.935523		30	1044.19	0.965577	0.995429	0.000891									30	0.969299	0.023157						30	537.671	0.994069		30	4087.38	0.866277		30	1280.89	0.978639
	40	1004.12	0.996339		40	1758.42	0.988018		40	1204.81	0.977556		40	2561.86	0.998082		40	1080.81	1	0.998789	1.47e-06									40	0.991999	0.009278						40	535.23	0.989324		40				40	1247.93	0.951813
	50	1007.78	1		50	1779.79	1		50	1221.29	0.991022		50	2564.3	0.999041		50	1077.76	0.997131	0.99968	6.49e-06									50	0.997439	0.003773						50	529.126	0.977461		50				50	1229.01	0.936413
	60	986.421	0.978646		60	1740.72	0.97809		60	1218.24	0.988529		60	2566.75	1		60	1064.33	0.984509	0.999915	0.000237									60	0.985955	0.008962						60				60				60	1216.19	0.925981
	70	978.486	0.970714		70	1740.11	0.977747		70	1218.85	0.989027		70	2524.63	0.983461		70	1052.73	0.973609	0.999978	0.000695									70	0.978912	0.007411						70				70				70	1223.52	0.931942
	80	986.421	0.978646		80	1719.36	0.966107		80	1218.85	0.989027		80	2530.12	0.985618		80	1041.14	0.962708	0.999994	0.00139									80								80				80				80	1185.06	0.900646
	90	959.565	0.9518		90	1668.7	0.937693		90	1206.03	0.978554		90	2476.41	0.964525		90	1041.14	0.962708	0.999998	0.001391									90								90				90				90	1184.45	0.900149
	100	950.41	0.942648		100	1682.74	0.945567		100	1196.27	0.970574		100	2477.64	0.965005		100	1029.54	0.951807	1	0.002323									100								100				100				100	1180.18	0.896672
	110	959.565	0.9518		110	1693.73	0.951729		110	1204.81	0.977556		110	2459.32	0.957814		110	1060.67	0.981067	1	0.000358									110								110				110				110	1187.51	0.902633
	120				120				120				120				120													120								120				120				120
	130				130				130				130				130													130								130				130				130
		z->	3.99881			z->	3.23025			z->	3.55602			z->	2.38365			z->	3.40621											z->	3.31499	0.593422							z->	3.14089			z->	3.31631			z->	3.07354
		V1/2->	-12.1256			V1/2->	-9.67718			V1/2->	-10.8157			V1/2->	-5.05851			V1/2->	-10.4362											V1/2->	-9.62262	2.70112							V1/2->	-51.8412			V1/2->	-55.4713			V1/2->	-50.6225
																				Sum of squares	0.011235
[truncated: 10 more columns]
