# Supplementary material for: Control of Slc7a5 sensitivity by the voltage-sensing domain of Kv1 channels
Source: eLife. 2020 Nov 9;9:e54916. doi: 10.7554/eLife.54916 (PMC7690953; doi:10.7554/eLife.54916)
Supplement: Figure 9—source data 1. [file elife-54916-fig9-data1.xlsx]

## Sheet: Sheet1
Kv1.1 (V168A) LM cells				pre train (pA/pF)	post-train (pA/pF)	Fold disinhibition
2020_03_10_0061Leak.abf				152.304	147.31	0.967211
2020_03_10_0060.abf				68.8051	102.674	1.49224
2020_03_10_0058.abf				429.461	584.317	1.36058
2020_03_10_0056Leak.abf				60.9102	89.8906	1.47579
2020_03_10_0055.abf				343.941	363.035	1.05551
2020_03_10_0053.abf				357.782	476.413	1.33157
2020_03_09_0077.abf				743.064	748.308	1.00706
2020_03_09_0076Leak.abf				341.093	342.206	1.00326
2020_03_09_0080Leak2tr.abf				299.152	304.108	1.01657
2017_10_20_0033.abf				188.524	374.995	1.98911
2017_10_20_0037_leak400.abf				257.291	725.962	2.82156
2017_10_20_0042.abf				172.375	206.323	1.19694
2017_10_20_0046.abf				385.93	583.329	1.51149
2017_10_20_0050_leak200.abf				462.602	523.631	1.13193
2017_10_20_0057.abf				35.2363	200.236	5.68267
2017_10_20_0061_leak100.abf				189.659	222.211	1.17164
			average	310.724	350.918	1.63844
			STD	209.589	224.102	1.13914
			SEM	69.8629	74.7006	0.284786
Kv1.1 (V168A) ShR 4-1 cells				pre train (pA/pF)	post-train (pA/pF)	Fold disinhibition
2020_03_10_0051Leak.abf				259.871	319.09	1.22788
2020_03_10_0050Leak.abf				873.873	809.431	0.926257
2020_03_10_0049.abf				498.785	658.895	1.321
2020_03_10_0047.abf				270.517	330.898	1.22321
2020_03_10_0044.abf				311.452	315.742	1.01378
2020_03_10_0042.abf				357.88	384.076	1.0732
2020_03_10_0039Leak.abf				249.268	269.431	1.08089
2020_03_09_0071.abf				289.515	258.636	0.89334
2020_03_09_0068.abf				133.293	148.256	1.11226
2020_03_09_0067Leak.abf				537.072	469.551	0.874281
2020_03_09_0066.abf				177.472	226.998	1.27907
2020_03_09_0063.abf				363.483	392.227	1.07908
			average	360.207	381.936	1.09202
			STD	199.324	186.999	0.149126
			SEM	57.5398	53.9819	0.043049
Kv1.1 (V168I) LM cells				pre train (pA/pF)	post-train (pA/pF)	Fold disinhibition
2020_03_19_0035Leak.abf				4.70202	17.0062	3.61678
2020_03_19_0034Leak.abf				2.57161	13.3452	5.18944
2020_03_19_0030Leak.abf				12.7827	79.9994	6.25842
2020_03_19_0026.abf				5.26067	58.9875	11.2129
2020_03_10_0035.abf				20.7247	84.248	4.06511
2020_03_10_0033.abf				80.7171	231.271	2.8652
2020_03_10_0027.abf				31.0604	116.144	3.7393
2020_03_10_0026.abf				26.9131	89.0074	3.30721
2020_03_10_0023.abf				3.26121	38.0256	11.66
2020_03_10_0020.abf				3.87362	52.0996	13.4498
2020_03_09_0037Leak.abf				12.3827	53.0887	4.28732
2017_10_20_0006_leak160.abf				52.0366	324.704	6.23991
2017_10_20_0011_leak300.abf				21.6066	127.573	5.90438
2017_10_20_0017_leak50.abf				14.5631	174.225	11.9635
2017_10_20_0021_leak120.abf				5.06312	40.143	7.92852
2017_10_20_0025_leak150.abf				29.5888	178.381	6.02868
2017_10_20_0029_leak250.abf				10.9649	66.0494	6.02372
			average	18.5682	75.7476	6.6906
			STD	22.8912	60.172	3.36547
			SEM	6.90195	18.1425	0.816247
Kv1.1 (V168I) ShR 4-1 cells				pre train (pA/pF)	post-train (pA/pF)	Fold disinhibition
2020_03_19_0024Leak.abf				108.037	172.124	1.5932
2020_03_19_0017Leak.abf				220.923	252.162	1.14141
2020_03_19_0016.abf				22.5988	57.0624	2.52502
2020_03_19_0008.abf				95.2155	104.58	1.09835
2020_03_19_0003Leak.abf				55.5311	103.941	1.87177
2020_03_10_0013Leak.abf				107.601	231.725	2.15356
2020_03_10_0007Leak.abf				147.835	333.453	2.25558
2020_03_10_0001.abf				206.525	370.506	1.794
2020_03_09_0027.abf				25.8226	42.3073	1.63838
2020_03_09_0026.abf				156.454	160.151	1.02363
2020_03_09_0022Leak.abf				64.2321	88.6461	1.38009
2020_03_09_0017Leak.abf				21.8668	32.8986	1.5045
2020_03_09_0010.abf				80.4965	112.331	1.39547
2020_03_09_0008.abf				109.573	185.285	1.69098
2020_03_09_0030.abf				76.6973	118.274	1.54209
			average	99.9605	157.696	1.64054
			STD	61.7947	101.652	0.42973
			SEM	15.9553	26.2465	0.110956
WT Kv1.1 LM cells				pre train (pA/pF)	post-train (pA/pF)	Fold disinhibition
2020_03_10_0066.abf				115.918	320.592	2.76567
2020_03_10_0064.abf				84.4796	134.285	1.58955
2020_03_10_0063.abf				27.3701	61.6313	2.25178
2020_03_09_0058.abf				33.2883	86.1262	2.58728
2018_09_24_0004.abf				18.0171	69.721	3.86971
2018_09_11_0010.abf				13.5257	32.6226	2.4119
2019_05_01_0030.abf				6.80527	26.2846	3.86239
2019_05_01_0023.abf				15.1838	34.6294	2.28068
2019_05_01_0011.abf				11.863	44.5935	3.75904
2019_05_01_0006.abf				4.16688	23.2741	5.5855
2019_05_01_0001.abf				6.01261	32.5979	5.42159
2017_04_11_0188_leak180.abf				24.5742	129.049	5.25141
2017_04_11_0194_leak160.abf				13.4491	68.775	5.11372
2017_04_14_0125_leak180.abf				80.4087	173.359	2.15598
2017_04_14_0131.abf				26.9209	105.939	3.93521
2017_04_14_0142_leak420.abf				91.5629	173.327	1.89298
2017_04_14_0155_leak220.abf				79.2782	229.273	2.89201
2017_04_20_0264.abf				97.7593	291.314	2.97991
2017_04_20_0271.abf				34.4188	68.1768	1.9808
2017_04_20_0279.abf				29.639	95.8992	3.23557
2017_04_20_0285.abf				73.4374	158.301	2.15559
2017_04_20_0291.abf				117.961	410.531	3.48022
			average	30.6028	78.7597	3.24811
			STD	36.2048	86.7189	1.221
			SEM	10.9162	26.1467	0.260318
WT Kv1.1 ShR4-1 cells				pre train (pA/pF)	post-train (pA/pF)	Fold disinhibition
2020_03_13_0044.abf				184.114	226.217	1.22868
2020_03_11_0030.abf				116.681	141.301	1.211
2020_03_11_0015.abf				67.837	113.17	1.66827
2020_03_10_0068.abf				418.091	555.753	1.32926
2020_03_11_0027Leak.abf				21.1529	50.7611	2.39973
2020_03_09_0055.abf				31.1307	67.3616	2.16383
2020_03_09_0050.abf				232.766	231.268	0.993564
2020_03_09_0048.abf				156.947	136.674	0.870825
2020_03_09_0051Leak.abf				83.8775	112.204	1.33771
2020_03_09_0057Leak.abf				351.073	358.801	1.02201
			average	166.367	199.351	1.42249
			STD	133.604	154.922	0.506825
			SEM	42.2494	48.9906	0.160272
